# Supplementary material for: Organocatalyzed diastereoselective cyclization of β-alkyl nitroolefins with alkylidene malononitriles: new approach to azetidine nitrones and isoxazoles
Source: Royal Society of Chemistry journal article supplement (doi:10.1039/d3qo01979a), 2024-01-01

## Electronic Supporting Information

# Organocatalyzed diastereoselective cyclization of $\beta$ -alkyl nitroolefins with alkylidene malononitriles: new approach to azetidine nitrones and isoxazoles

Shikha S. Rathor,<sup>a</sup> Ashvani K. Patel<sup>a</sup> and Sampak Samanta<sup>\*,a</sup>

<sup>a</sup>Department of Chemistry, Indian Institute of Technology Indore, Simrol, 453552, India

### Table of contents:

|                                                                                                          |         |
|----------------------------------------------------------------------------------------------------------|---------|
| General information.....                                                                                 | S2      |
| General procedure for the synthesis of azetidine nitrones.....                                           | S2      |
| <sup>1</sup> H, <sup>13</sup> C and <sup>19</sup> F NMR data of <b>3aa-3cf</b> .....                     | S2-S16  |
| Single-crystal X-ray diffraction data of <b>3aa</b> .....                                                | S3-S5   |
| Single-crystal X-ray diffraction data of <b>3af</b> .....                                                | S7-S8   |
| General procedure for the synthesis of isoxazoles <b>4a-4x</b> .....                                     | S16     |
| <sup>1</sup> H, <sup>13</sup> C and <sup>19</sup> F NMR data of <b>4a-4x</b> .....                       | S16-S22 |
| <sup>1</sup> H and <sup>13</sup> C NMR data of <b>5aa</b> .....                                          | S23     |
| Control experiment data.....                                                                             | S24     |
| References.....                                                                                          | S26     |
| Copies of <sup>1</sup> H, <sup>13</sup> C and <sup>19</sup> F NMR spectra of <b>3aa-compound 6</b> ..... | S27-S97 |

**General information:** All the reactions were carried out either under an inert atmosphere or air and monitored by TLC using Merck 60 F<sub>254</sub> pre-coated silica-gel plates and the products were visualized by UV detection. Flash chromatography was carried out using silica-gel (200-300 mesh). <sup>1</sup>H and <sup>13</sup>C NMR spectra were recorded on 500 MHz and 400 MHz spectrometers. Data for <sup>1</sup>H NMR are reported as a chemical shift (δ ppm), multiplicity (s = singlet, d = doublet, t = triplet, q = quartet, m = multiplet), coupling constant *J* (Hz), integration, and assignment, data for <sup>13</sup>C are reported as a chemical shift. High resolution mass spectrometry (HRMS) data analysis was carried out using ESI-TOF-MS. Melting points were recorded on an Electro thermal melting points apparatus and are uncorrected.

**Starting materials:** All the β-alkyl nitroalkenes (**1a-1d**),<sup>1</sup> and alkylidene malononitriles (**2a-z**)<sup>2</sup> were synthesized by literature known procedures. All the starting materials were known in the literatures. All the catalysts were purchased from commercial suppliers.

**General procedure for the synthesis of azetidine nitrone (3):**

To a stirred solution of 3-nitroallylarene **1** (0.2 mmol) and alkylidene malononitrile **2** (0.24 mmol) in dry DCM (1.0 mL) under an argon atmosphere was added DABCO (0.02 mmol, 10 mol%) at room temperature. The progress of the reaction was monitored by TLC. After completion of the reaction, the solvent was removed, followed by the extraction with ethyl acetate (3 × 10 mL). The extracted solvent was washed with brine and dried over anhydrous Na<sub>2</sub>SO<sub>4</sub>. The combined organic phases were concentrated under reduced pressure at room temperature to give the crude product. It was purified by silica gel column chromatography using ethyl acetate/hexane (1:5) as a mixture of solvent to provide a pure solid nitrone product **3**. The yield was calculated based on the pure product with a mixture of diastereomer. The above procedure was followed for synthesizing all the products in Scheme 2. Finally, the purified product with a mixture of diastereomer was partially crystallized by using ethyl acetate/hexane as a mixture of solvent to obtain major isomer which was characterized by its spectroscopic data (<sup>1</sup>H, <sup>13</sup>C NMR and HRMS data).

**(2*S*\*,3*R*\*)-2-Carbamoyl-2-cyano-3-phenyl-4-((*E*)-styryl)-2,3-dihydroazete 1-oxide (3aa):**

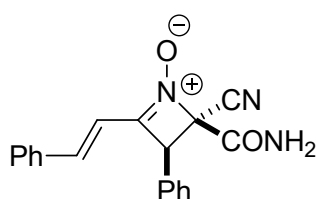

White solid; mp 141-143 °C; yield = 82%; dr = 84:16; *R<sub>f</sub>* = 0.30 (EtOAc/hexane = 30:70); <sup>1</sup>H NMR (500 MHz, CDCl<sub>3</sub>) δ 7.53-7.34 (m, 8H), 7.31-7.29 (m, 2H), 7.13 (s, 1H), 7.12 (d, *J* = 16.4 Hz, 1H), 7.02 (d, *J* = 16.5 Hz, 1H), 5.71 (s, 1H), 4.82 (s, 1H) ppm; <sup>13</sup>C NMR (125 MHz, CDCl<sub>3</sub>) δ 161.2, 154.9, 142.2, 135.7, 131.9, 131.1, 131.0, 130.4,

130.3, 129.9, 129.0, 114.0, 112.1, 77.1, 51.9 ppm; HRMS (ESI)  $m/z$  calcd for  $C_{19}H_{15}N_3O_2Na^+$   $[M+Na]^+$ : 340.1056, found 340.1063.

The relative stereochemistry of major isomer **3aa** was assigned by its single-crystal-X-ray diffraction data.

**Crystallographic data:** Single crystal X-ray structural of compound **3aa** was measured on the SuperNova, Dual, Mo at home/near, Eos-XRD at 150(2) K using graphite monochromated Mo  $K\alpha$  radiation ( $\lambda = 0.71073 \text{ \AA}$ ). The strategy for the Data collection was evaluated by using the CrysAlisPro CCD software. The data were collected by the standard 'phi-omega scan techniques, and were scaled and reduced using CrysAlisPro RED software. The structure was solved by direct methods using SHELXS-97, and refined by full matrix least-squares with SHELXL-97, refining on  $F^2$ . The positions of all the atoms were obtained by direct methods. All non-hydrogen atoms were refined anisotropically. The remaining hydrogen atoms were placed in geometrically constrained positions, and refined with isotropic temperature factors, generally  $1.2U_{eq}$  of their parent atoms. The crystal data are summarized in Table S1. The **CCDC** number(**2292044**) can be obtained free of charge via [www.ccdc.cam.ac.uk](http://www.ccdc.cam.ac.uk) (or from the Cambridge Crystallographic Data Centre, 12 union Road, Cambridge CB21 EZ, UK; Fax: (+44) 1223-336-033; or [deposit@ccdc.cam.ac.uk](mailto:deposit@ccdc.cam.ac.uk)).

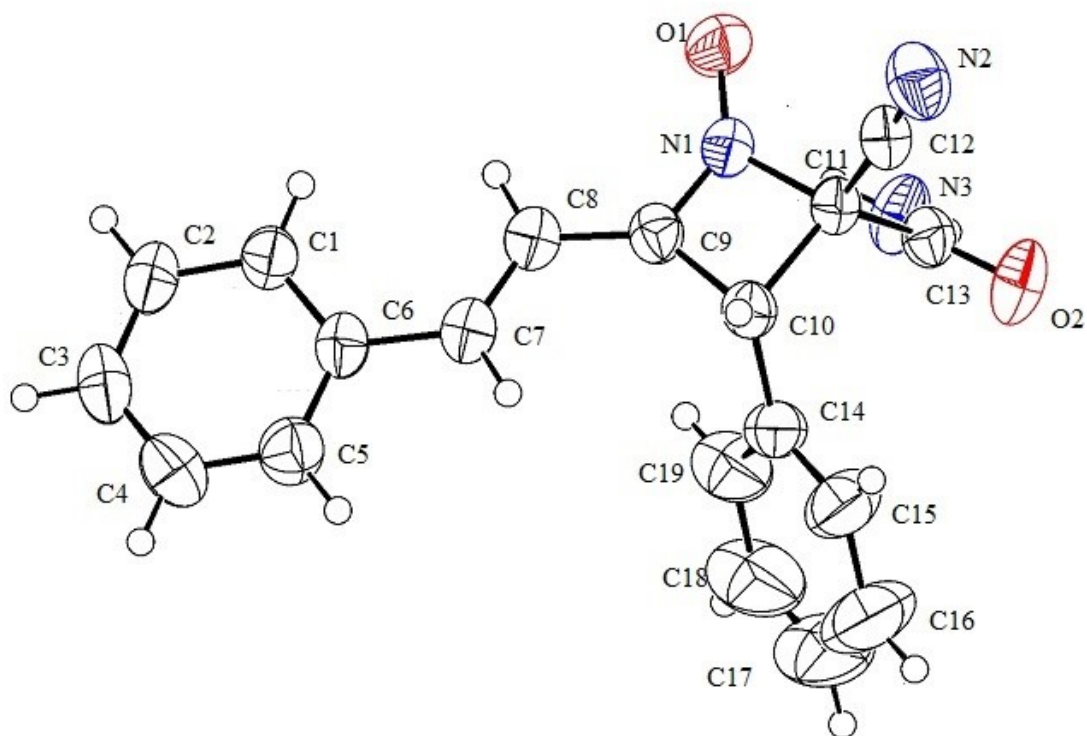

**Figure S1.** ORTEP diagram of compound **3aa** (CCDC 2292044), thermal ellipsoids drawn at the 50% probability level.

**Table S1: Crystal data and structure refinement for compound 3aa.**

|                                      |                                                               |
|--------------------------------------|---------------------------------------------------------------|
| Compound                             | <b>3aa</b>                                                    |
| Empirical formula                    | C <sub>19</sub> H <sub>15</sub> N <sub>3</sub> O <sub>2</sub> |
| Formula weight                       | 317.1164                                                      |
| Temperature/K                        | 298K                                                          |
| Wavelength (Å)                       | 0.71073 Å                                                     |
| Crystal system                       | Monoclinic                                                    |
| Space group                          | P2 <sub>1</sub> /c                                            |
| a/Å                                  | 11.8860(8)                                                    |
| b/Å                                  | 12.6490(6)                                                    |
| c/Å                                  | 12.3805(9)                                                    |
| α/°                                  | 90                                                            |
| β/°                                  | 114.440(9)                                                    |
| γ/°                                  | 90                                                            |
| Volume/Å <sup>3</sup>                | 1694.6(2)                                                     |
| Z                                    | 7                                                             |
| ρ <sub>calc</sub> /g/cm <sup>3</sup> | 1.244                                                         |
| μ/mm <sup>-1</sup>                   | 0.083                                                         |
| F (000)                              | 664.0                                                         |
| Radiation                            | Mo Kα (λ = 0.71073)                                           |
| 2θ range for data collection/°       | 6.442 to 58.686                                               |

|                                             |                                                               |
|---------------------------------------------|---------------------------------------------------------------|
| Index ranges                                | -15 ≤ h ≤ 15, -16 ≤ k ≤ 17, -16 ≤ l ≤ 16                      |
| Reflections collected                       | 20440                                                         |
| Independent reflections                     | 4226 [R <sub>int</sub> = 0.0512, R <sub>sigma</sub> = 0.0425] |
| Data/restraints/parameters                  | 4226/0/217                                                    |
| Goodness-of-fit on F <sup>2</sup>           | 1.047                                                         |
| Final R indexes [I >= 2σ (I)]               | R <sub>1</sub> = 0.0619, wR <sub>2</sub> = 0.1729             |
| Final R indexes [all data]                  | R <sub>1</sub> = 0.0888, wR <sub>2</sub> = 0.1901             |
| Largest diff. peak/hole / e Å <sup>-3</sup> | 0.42/-0.28                                                    |
| CCDC                                        | <b>2292044</b>                                                |

**(2*S*\*,3*R*\*)-2-Carbamoyl-2-cyano-4-((*E*)-styryl)-3-(4-methylphenyl)-2,3-dihydroazete 1-**

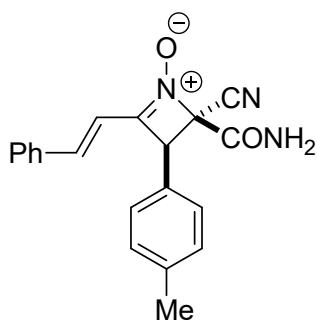

**oxide (3ab):** White solid; mp 152-154 °C; yield = 81%; dr = 84:16; R<sub>f</sub> = 0.28 (EtOAc/hexane = 30:70); <sup>1</sup>H NMR (500 MHz, CDCl<sub>3</sub>) δ 7.43-7.42 (m, 2H), 7.36-7.35 (m, 3H), 7.19 (br s, 4H), 7.12 (s, 1H), 7.11 (d, *J* = 16.5 Hz, 1H), 7.02 (d, *J* = 16.5 Hz, 1H), 5.73 (s, 1H), 4.79 (s, 1H), 2.35 (s, 3H) ppm; <sup>13</sup>C NMR (125 MHz, CDCl<sub>3</sub>) δ 160.3, 154.0, 141.0, 140.1, 134.7, 130.8, 130.1, 129.2, 128.7, 128.0, 126.9, 113.0, 111.1, 76.2, 50.7, 21.5 ppm;

HRMS (ESI) *m/z* calcd for C<sub>20</sub>H<sub>18</sub>N<sub>3</sub>O<sub>2</sub><sup>+</sup> [M+H]<sup>+</sup>: 332.1394 found 332.1375.

**(2*S*\*,3*R*\*)-2-Carbamoyl-2-cyano-3-(4-methoxyphenyl)-4-((*E*)-styryl)-2,3-dihydroazete 1-**

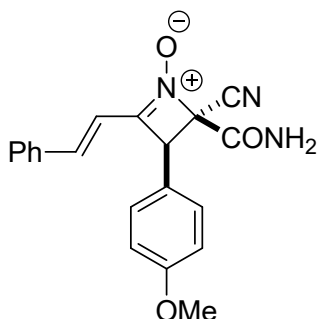

**oxide (3ac):** White solid; mp 158-160 °C; yield = 79%; dr = 81:19; R<sub>f</sub> = 0.27 (EtOAc/hexane = 30:70); <sup>1</sup>H NMR (500 MHz, CDCl<sub>3</sub>) δ 7.45-7.41 (m, 2H), 7.38-7.34 (m, 3H), 7.23 (d, *J* = 8.7 Hz, 2H), 7.12 (s, 1H), 7.11 (d, *J* = 16.4 Hz, 1H), 7.02 (d, *J* = 16.5 Hz, 1H), 6.90 (d, *J* = 8.7 Hz, 2H), 5.64 (s, 1H), 4.79 (s, 1H), 3.80 (s, 3H) ppm; <sup>13</sup>C NMR (125 MHz, CDCl<sub>3</sub>) δ 160.8, 160.2, 154.0, 141.0, 134.7, 130.9, 130.1, 129.2, 128.0, 121.7,

114.8, 113.0, 111.1, 76.2, 55.4, 50.6 ppm; HRMS (ESI) *m/z* calcd for C<sub>20</sub>H<sub>17</sub>N<sub>3</sub>O<sub>3</sub>Na<sup>+</sup> [M+Na]<sup>+</sup>: 370.1162, found 370.1188.

**(2*S*\*,3*R*\*)-2-Carbamoyl-2-cyano-3-(4-(methylthio)phenyl)-4-((*E*)-styryl)-2,3-**

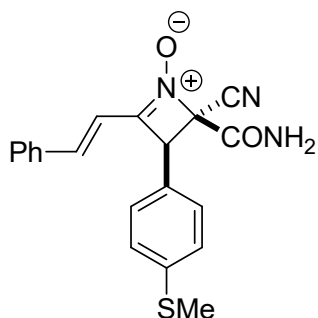

**dihydroazete 1-oxide (3ad):** White solid; mp 152-154 °C; yield = 77%; dr = 82:18; R<sub>f</sub> = 0.28 (EtOAc/hexane = 30:70); <sup>1</sup>H NMR (500 MHz, CDCl<sub>3</sub>) δ 7.46-7.41 (m, 2H), 7.38-7.35 (m, 3H), 7.22 (br s, 4H), 7.13 (s, 1H), 7.09 (d, *J* = 16.5 Hz, 1H), 7.02 (d, *J* = 16.5 Hz, 1H), 5.69 (s, 1H), 4.79 (s, 1H), 2.47 (s, 3H) ppm; <sup>13</sup>C NMR (125 MHz, CDCl<sub>3</sub>) δ 160.1, 153.8, 141.4, 141.1, 134.7, 130.9, 129.3,

129.1, 128.0, 126.5, 126.2, 112.9, 111.0, 76.1, 50.5, 15.2 ppm; HRMS (ESI)  $m/z$  calcd for  $C_{20}H_{17}N_3O_2SNa^+[M+Na]^+$ : 386.0934, found 386.0962.

**(2*S*\*,3*R*\*)-3-(4-(*tert*-Butyl)phenyl)-2-carbamoyl-2-cyano-4-((*E*)-styryl)-2,3-dihydroazete**

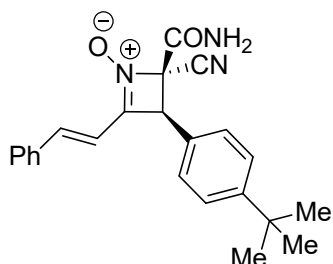

**1-oxide (3ae):** White solid; mp 167-169 °C; yield = 78%; dr = 86:14;  $R_f$  = 0.30 (EtOAc/hexane = 30:70);  $^1H$  NMR (500 MHz,  $CDCl_3$ )  $\delta$  7.44 (dd,  $J$  = 6.7, 2.7 Hz, 2H), 7.41-7.34 (m, 5H), 7.22 (d,  $J$  = 8.3 Hz, 2H), 7.17 (d,  $J$  = 16.5 Hz, 1H), 7.10 (s, 1H), 7.00 (d,  $J$  = 16.5 Hz, 1H), 5.79 (s, 1H), 4.80 (s, 1H), 1.30 (s, 9H);  $^{13}C$  NMR (125 MHz,  $CDCl_3$ )  $\delta$  160.3, 154.1, 153.1, 141.1, 134.8, 130.8, 129.2, 128.6, 128.0, 126.8, 126.3, 113.1, 111.2, 76.2, 50.6, 34.9, 31.3 ppm; HRMS (ESI)  $m/z$  calcd for  $C_{23}H_{23}N_3O_2^+[M+H]^+$ : 374.1863, found 374.1866.

**(2*S*\*,3*R*\*)-2-Carbamoyl-2-cyano-3-(2,5-dimethoxyphenyl)-4-((*E*)-styryl)-2,3-**

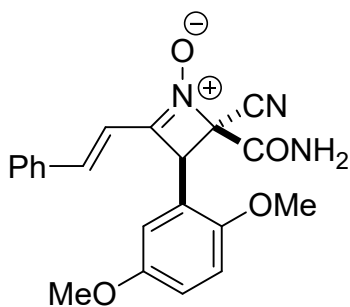

**dihydroazete 1-oxide (3af):** White solid; yield = 75%; mp 168-170 °C;  $R_f$  = 0.2 (EtOAc/ hexane = 30:70);  $^1H$  NMR (500 MHz,  $CDCl_3$ )  $\delta$  7.46-7.36 (m, 2H), 7.40-7.34 (m, 3H), 7.15 (d,  $J$  = 16.4 Hz, 1H), 7.05 (d,  $J$  = 16.5 Hz, 1H), 6.97 (s, 1H), 6.87 (br s, 2H), 6.70 (s, 1H), 5.64 (s, 1H), 5.11 (s, 1H), 3.87 (s, 3H), 3.69 (s, 3H) ppm;  $^{13}C$  NMR (125 MHz,  $CDCl_3$ )  $\delta$  160.2, 153.5, 152.7, 140.4, 134.8, 130.7 (2C), 129.2, 127.9, 119.7, 115.6, 114.9, 113.2, 112.0, 111.4, 75.9, 56.4, 55.9, 45.9 ppm; HRMS (ESI)  $m/z$  calcd for  $C_{21}H_{19}N_3O_4Na^+[M+Na]^+$ : 400.1268, found 400.1254.

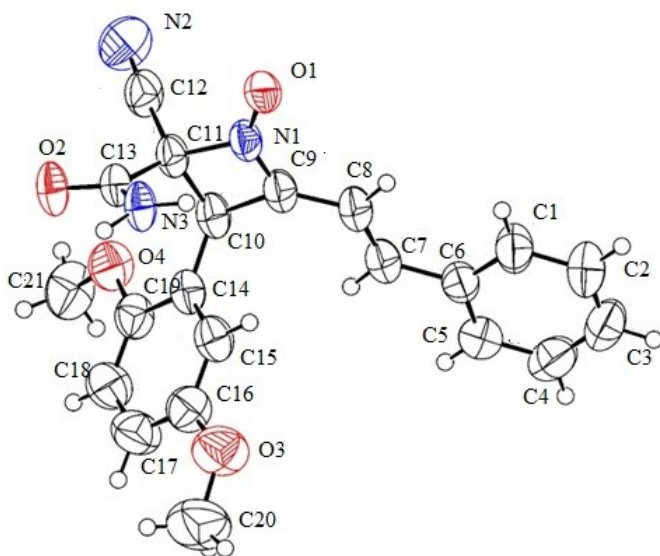

**Figure S1.** ORTEP diagram of compound **3af** (CCDC 2292045), thermal ellipsoids drawn at the 50% probability level.

**Table S2: Crystal data and structure refinement for compound 3af.**

|                                           |                                                                        |
|-------------------------------------------|------------------------------------------------------------------------|
| Compound                                  | <b>3af</b>                                                             |
| Empirical formula                         | C <sub>21</sub> H <sub>19</sub> N <sub>3</sub> O <sub>4</sub>          |
| Formula weight                            | 377.1376                                                               |
| Temperature/K                             | 293 K                                                                  |
| Wavelength (Å)                            | 0.71073 Å                                                              |
| Crystal system                            | Monoclinic                                                             |
| Space group                               | I2/a                                                                   |
| a/Å                                       | 16.4422(7)                                                             |
| b/Å                                       | 14.3442(5)                                                             |
| c/Å                                       | 17.1296(7)                                                             |
| $\alpha$ /°                               | 90                                                                     |
| $\beta$ /°                                | 99.822(4)                                                              |
| $\gamma$ /°                               | 90                                                                     |
| Volume/Å <sup>3</sup>                     | 3980.8(3)                                                              |
| Z                                         | 8                                                                      |
| $\rho_{\text{calc}}/\text{g}/\text{cm}^3$ | 1.259                                                                  |
| $\mu/\text{mm}^{-1}$                      | 0.089                                                                  |
| F (000)                                   | 1584.0                                                                 |
| Radiation                                 | Mo K $\alpha$ ( $\lambda$ = 0.71073)                                   |
| 2 $\theta$ range for data collection/°    | 6.35 to 58.162                                                         |
| Index ranges                              | -22 $\leq$ h $\leq$ 21, -19 $\leq$ k $\leq$ 19, -23 $\leq$ l $\leq$ 20 |
| Reflections collected                     | 25442                                                                  |
| Independent reflections                   | 4942 [Rint = 0.0565, Rsigma = 0.0298]                                  |
| Data/restraints/parameters                | 4942/0/260                                                             |
| Goodness-of-fit on F <sup>2</sup>         | 1.050                                                                  |

|                                                |                                  |
|------------------------------------------------|----------------------------------|
| Final R indexes [ $I \geq 2\sigma(I)$ ]        | $R_1 = 0.0640$ , $wR_2 = 0.1435$ |
| Final R indexes [all data]                     | $R_1 = 0.0911$ , $wR_2 = 0.1665$ |
| Largest diff. peak/hole / $e \text{ \AA}^{-3}$ | 0.15/-0.26                       |
| CCDC                                           | <b>2292045</b>                   |

**(2*S*\*,3*R*\*)-3-(4-(Benzyloxy)-3-methoxyphenyl)-2-carbamoyl-2-cyano-4-((*E*)-styryl)-2,3-**

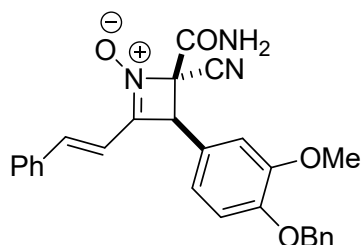

**dihydroazete 1-oxide (3ag):** White solid; mp 153-155 °C;

yield = 76%; dr = 80:20;  $R_f = 0.2$  (EtOAc/hexane = 30:70);  $^1\text{H}$

NMR (500 MHz,  $\text{CDCl}_3$ )  $\delta$  7.46-7.40 (m, 5H), 7.39-7.32 (m,

6H), 7.32 (d,  $J = 7.2$  Hz, 2H), 7.13 (d,  $J = 16.5$  Hz, 1H), 7.01

(d,  $J = 16.5$  Hz, 1H), 6.86 (d,  $J = 8.0$  Hz, 2H), 6.80 (s, 1H),

5.65 (s, 1H), 5.12 (s, 2H), 4.76 (s, 1H), 3.85 (s, 3H) ppm;  $^{13}\text{C}$  NMR (125 MHz,  $\text{CDCl}_3$ )  $\delta$

160.2, 154.0, 150.1, 149.6, 141.1, 136.7, 134.7, 130.9, 129.3, 128.8, 128.2, 128.0, 127.5,

122.5, 121.3, 113.8, 113.1, 112.3, 111.0, 76.3, 71.1, 56.3, 50.9 ppm; HRMS (ESI)  $m/z$  calcd

for  $\text{C}_{27}\text{H}_{24}\text{N}_3\text{O}_4^+[\text{M}+\text{H}]^+$ : 454.1761, found 454.1777.

**(2*S*\*,3*R*\*)-3-([1,1'-Biphenyl]-4-yl)-2-carbamoyl-2-cyano-4-((*E*)-styryl)-2,3-dihydroazete**

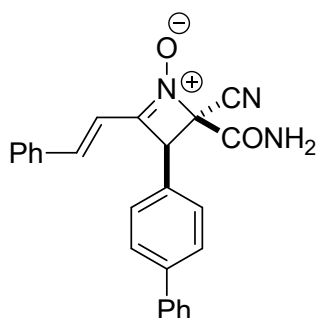

**1-oxide (3ah):** White solid; mp 160-162 °C; yield = 80%; dr =

83:17;  $R_f = 0.30$  (EtOAc/hexane = 30:70);  $^1\text{H}$  NMR (500 MHz,

$\text{CDCl}_3$ )  $\delta$  7.60 (d,  $J = 7.5$  Hz, 2H), 7.57 (d,  $J = 7.8$  Hz, 2H),

7.45-7.42 (m, 4H), 7.40-7.32 (m, 6H), 7.16 (s, 1H), 7.15 (d,  $J =$

17.2 Hz, 1H), 7.04 (d,  $J = 16.5$  Hz, 1H), 5.83 (s, 1H), 4.86 (s,

1H) ppm;  $^{13}\text{C}$  NMR (125 MHz,  $\text{CDCl}_3$ )  $\delta$  160.2, 153.9, 142.8,

141.1, 140.0, 134.7, 130.9, 129.3(2C), 129.2, 129.0, 128.9,

128.0, 127.9, 127.2, 113.0, 111.0, 76.2, 50.6 ppm; HRMS (ESI)  $m/z$  calcd for  $\text{C}_{25}\text{H}_{19}\text{N}_3\text{O}_2\text{Na}^+$

$[\text{M}+\text{Na}]^+$ : 416.1376, found 416.1375.

**(2*S*\*,3*R*\*)-2-Carbamoyl-2-cyano-3-(4-(phenylethynyl)phenyl)-4-((*E*)-styryl)-2,3-**

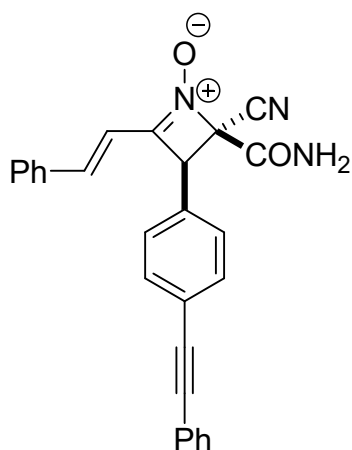

**dihydroazete 1-oxide (3ai):** White solid; mp 155-157 °C; yield

= 78%; dr = 85:15;  $R_f = 0.30$  (EtOAc/hexane = 30:70);  $^1\text{H}$

NMR (400 MHz,  $\text{CDCl}_3$ )  $\delta$  7.60-7.43 (m, 4H), 7.46-7.25 (m,

10H), 7.20-7.10 (m, 3H), 5.80 (s, 1H), 4.84 (s, 1H) ppm;  $^{13}\text{C}$

NMR (100 MHz,  $\text{CDCl}_3$ )  $\delta$  160.0, 153.6, 141.1, 134.6, 132.5,

131.8, 131.0, 130.0, 129.3, 128.9, 128.8, 128.6, 128.0, 125.2,

122.9, 112.9, 110.9, 91.4, 88.5, 76.1, 50.5 ppm; HRMS (ESI)

$m/z$  calcd for  $\text{C}_{27}\text{H}_{20}\text{N}_3\text{O}_2\text{N}^+[\text{M}+\text{H}]^+$ : 418.1550, found

418.1559.



**(2*S*\*,3*R*\*)-2-Carbamoyl-2-cyano-3-(4-fluorophenyl)-4-((*E*)-styryl)-2,3-dihydroazete 1-oxide (3aj):** White solid; mp 150-152 °C; yield = 82%; dr = 85:15;  $R_f$  = 0.30 (EtOAc/hexane

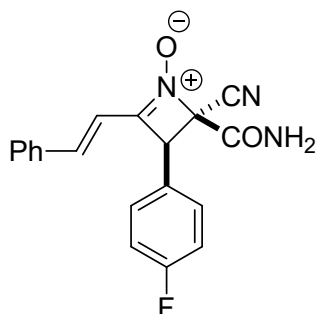

= 30:70);  $^1\text{H}$  NMR (500 MHz, DMSO- $d_6$ )  $\delta$  7.93 (s, 2H), 7.62-7.55 (m, 2H), 7.47-7.42 (m, 2H), 7.41-7.34 (m, 3H), 7.21 (t,  $J$  = 8.7 Hz, 2H), 7.15 (d,  $J$  = 16.5 Hz, 1H), 7.06 (d,  $J$  = 16.5 Hz, 1H), 5.28 (s, 1H) ppm;  $^{13}\text{C}$  NMR (125 MHz, DMSO- $d_6$ ) 162.4(d,  $J_{\text{C-F}}$  = 244 Hz), 159.7, 152.1, 137.8, 135.0, 131.79 (d,  $J$  = 8.6 Hz), 130.0, 129.1, 127.7, 127.0, 115.4 (d,  $J_{\text{C-F}}$  = 21.4 Hz), 114.2, 112.1, 78.7, 47.6 ppm;  $^{19}\text{F}$  NMR (470 MHz, DMSO- $d_6$ )  $\delta$ (major isomer) -112.8 ppm;  $\delta$ (minor isomer) -113.8 ppm; HRMS (ESI)  $m/z$  calcd for  $\text{C}_{29}\text{H}_{19}\text{FN}_3\text{O}_2\text{Na}^+$  [ $\text{M}+\text{Na}$ ] $^+$ : 358.0962, found 358.0958.

**(2*S*\*,3*R*\*)-2-Carbamoyl-3-(4-chlorophenyl)-2-cyano-4-((*E*)-styryl)-2,3-dihydroazete 1-oxide (3ak):** White solid; mp 158-160 °C; yield = 84%; dr =

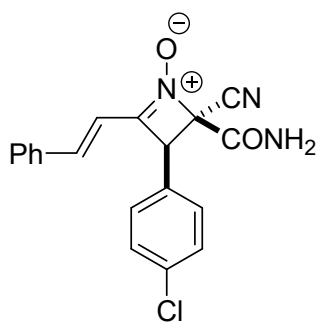

82:18;  $R_f$  = 0.33 (EtOAc/hexane = 30:70);  $^1\text{H}$  NMR (500 MHz,  $\text{CDCl}_3$ )  $\delta$  7.45-7.41 (m, 2H), 7.39-7.34 (m, 5H), 7.27-7.23 (m, 2H), 7.15 (s, 1H), 7.07 (d,  $J$  = 16.5 Hz, 1H), 7.00 (d,  $J$  = 16.5 Hz, 1H), 5.72 (s, 1H), 4.79 (s, 1H) ppm;  $^{13}\text{C}$  NMR (125 MHz,  $\text{CDCl}_3$ )  $\delta$  159.9, 153.4, 141.1, 136.8, 134.5, 131.0, 130.1, 129.7, 129.3, 128.6, 128.0, 112.8, 110.8, 75.9, 50.0 ppm; HRMS (ESI)  $m/z$  calcd for  $\text{C}_{19}\text{H}_{14}\text{ClN}_3\text{O}_2\text{Na}^+$  [ $\text{M}+\text{Na}$ ] $^+$ : 374.0667, found 374.0669.

**(2*S*\*,3*R*\*)-3-(4-Bromophenyl)-2-carbamoyl-2-cyano-4-((*E*)-styryl)-2,3-dihydroazete 1-oxide (3al):** White solid; mp 166-168 °C; yield = 80%; dr = 81:19;

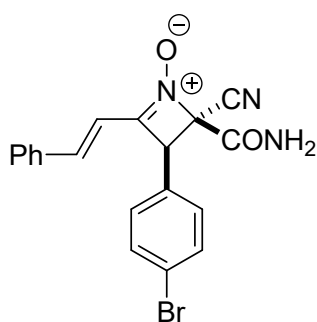

$R_f$  = 0.31 (EtOAc/hexane = 30:70);  $^1\text{H}$  NMR (500 MHz,  $\text{CDCl}_3$ )  $\delta$  7.60 (d,  $J$  = 7.9 Hz, 2H), 7.51 (d,  $J$  = 6.5 Hz, 2H), 7.45 (br s, 3H), 7.26 (d,  $J$  = 7.9 Hz, 2H), 7.23 (s, 1H), 7.15 (d,  $J$  = 16.5 Hz, 1H), 7.08 (d,  $J$  = 16.5 Hz, 1H), 5.75 (s, 1H), 4.86 (s, 1H) ppm;  $^{13}\text{C}$  NMR (125 MHz,  $\text{CDCl}_3$ )  $\delta$  159.9, 153.3, 141.2, 134.5, 132.7, 131.0, 130.4, 129.2, 129.1, 128.0, 124.4, 112.8, 110.8, 75.7, 50.1 ppm; HRMS (ESI)  $m/z$  calcd for  $\text{C}_{19}\text{H}_{14}^{79}\text{BrN}_3\text{O}_2\text{Na}^+$  [ $\text{M}+\text{Na}$ ] $^+$ : 418.0162, found 418.0166.

**(2*S*\*,3*R*\*)-2-Carbamoyl-2-cyano-4-((*E*)-styryl)-3-(4-(trifluoromethyl)-phenyl)-2,3-**

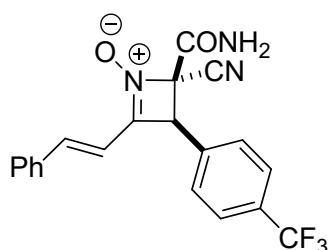

**dihydroazete 1-oxide (3am):** White solid; mp 174-176 °C; yield = 81%; dr = 82:18;  $R_f$  = 0.30 (EtOAc/hexane = 30:70);  $^1\text{H}$

NMR (500 MHz, DMSO-*d*<sub>6</sub>) δ 7.98 (d, *J* = 4.5 Hz, 2H), 7.77 (d, *J* = 8.2 Hz, 2H), 7.66-7.58 (m, 4H), 7.41-7.33 (m, 3H), 7.19 (d, *J* = 16.5 Hz, 1H), 7.11 (d, *J* = 16.5 Hz, 1H), 5.42 (s, 1H) ppm; <sup>13</sup>C NMR (125 MHz, DMSO-*d*<sub>6</sub>) δ 159.5, 151.8, 137.9, 135.6, 135.0, 130.5, 130.0, 129.5, 129.4, 129.2, 127.7, 125.3 (q), 114.0, 112.1, 78.4, 47.6 ppm; HRMS (ESI) *m/z* calcd for C<sub>20</sub>H<sub>15</sub>F<sub>3</sub>N<sub>3</sub>O<sub>2</sub><sup>+</sup> [M+H]<sup>+</sup>: 386.1111, found 386.1123.

**(2*S*\*,3*R*\*)-2-Carbamoyl-2-cyano-3-(4-cyanophenyl)-4-((*E*)-styryl)-2,3-dihydroazete 1-**

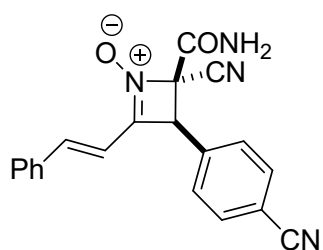

**oxide (3an):** White solid; mp 180-182 °C; yield = 79%; dr = 83:17; *R<sub>f</sub>* = 0.26 (EtOAc/hexane = 30:70); <sup>1</sup>H NMR (500 MHz, DMSO-*d*<sub>6</sub>) δ 7.97 (s, 2H), 7.88 (d, *J* = 8.2 Hz, 2H), 7.65-7.55 (m, 4H), 7.43-7.31 (m, 3H), 7.17 (d, *J* = 16.5 Hz, 1H), 7.07 (d, *J* = 16.5 Hz, 1H), 5.41 (s, 1H) ppm; <sup>13</sup>C NMR (125 MHz, DMSO-

*d*<sub>6</sub>) δ 159.9, 152.1, 138.4, 136.9, 135.4, 132.7, 131.1, 130.5, 129.5, 128.2, 118.9, 114.4, 112.5, 112.2, 78.8, 48.1 ppm; HRMS (ESI) *m/z* calcd for C<sub>20</sub>H<sub>14</sub>N<sub>4</sub>O<sub>2</sub>Na<sup>+</sup> [M+Na]<sup>+</sup>: 363.1009, found 363.1041

**(2*S*\*,3*R*\*)-2-Carbamoyl-2-cyano-3-(2,6-dichlorophenyl)-4-((*E*)-styryl)-2,3-dihydroazete**

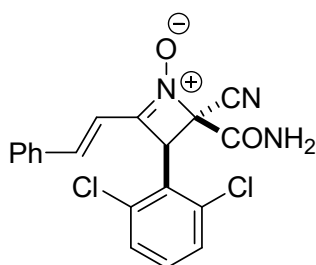

**1-oxide (3ao):** White solid; mp 167-169 °C; yield = 68%; dr = 93:7; *R<sub>f</sub>* = 0.30 (EtOAc/hexane = 30:70); <sup>1</sup>H NMR (500 MHz, CDCl<sub>3</sub>) δ 7.51 (d, *J* = 6.4 Hz, 1H), 7.43-7.41 (m, 2H), 7.40 (d, *J* = 6.6 Hz, 1H), 7.38-7.31 (m, 4H), 7.21 (s, 1H), 7.05-6.97 (m, 2H), 6.01 (s, 1H), 5.61 (s, 1H) ppm; <sup>13</sup>C NMR (125 MHz, CDCl<sub>3</sub>) δ

161.2, 154.2, 139.1, 134.8, 131.5, 130.8, 130.6, 129.5, 129.2, 127.9, 125.8, 112.5, 110.9, 76.9, 44.5 ppm; HRMS (ESI) *m/z* calcd for C<sub>19</sub>H<sub>14</sub>Cl<sub>2</sub>N<sub>3</sub>O<sub>2</sub><sup>+</sup> [M+H]<sup>+</sup>: 386.0458, found 386.0463.

**((2*S*\*,3*R*\*)-2-Carbamoyl-2-cyano-3-(2-fluorophenyl)-4-((*E*)-styryl)-2,3-dihydroazete 1-**

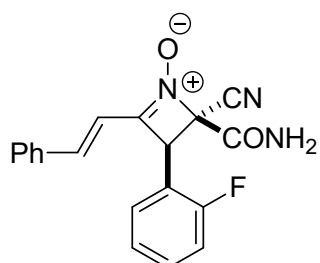

**oxide (3ap):** White solid; mp 152-154 °C; yield = 76%; dr = 87:13; *R<sub>f</sub>* = 0.30 (EtOAc/hexane = 30:70); <sup>1</sup>H NMR (500 MHz, CDCl<sub>3</sub>) δ 7.46-7.44 (m, 2H), 7.42-7.40 (m, 1H), 7.37-7.35 (m, 5H), 7.04 (d, *J* = 16.5 Hz, 1H), 5.72 (s, 1H), 5.09 (s, 1H) ppm; <sup>13</sup>C NMR (125 MHz, CDCl<sub>3</sub>) 161.8 (d, *J<sub>C-F</sub>* = 249.18 Hz), 159.9, 152.6, 140.8, 134.7, 131.93 (d, *J<sub>C-F</sub>* = 8.4 Hz), 130.9, 129.3, 128.0, 124.8 (d, *J<sub>C-F</sub>* = 3.7 Hz), 117.89 (d, *J<sub>C-F</sub>* = 13.6

Hz), 116.4, 116.2, 112.7, 111.1, 75.2, 44.31 (d, *J<sub>C-F</sub>* = 4.3 Hz) ppm; HRMS (ESI) *m/z* calcd for C<sub>19</sub>H<sub>15</sub>FN<sub>3</sub>O<sub>2</sub><sup>+</sup> [M+H]<sup>+</sup>: 336.1143, found 336.1141.

**(2*S*\*,3*R*\*)-2-Carbamoyl-3-(2-chlorophenyl)-2-cyano-4-((*E*)-styryl)-2,3-dihydroazete 1-**

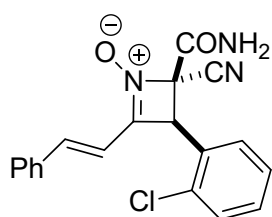

**oxide (3aq):** White solid; mp 170-172 °C; yield = 75%; dr = 86:14;  $R_f = 0.30$  (EtOAc/hexane = 30:70);  $^1\text{H NMR}$  (500 MHz, DMSO- $d_6$ )  $\delta$  7.95 (s, 1H), 7.89 (s, 1H), 7.65-7.59 (m, 2H), 7.55 (d,  $J = 7.8$  Hz, 1H), 7.43-7.37 (m, 5H), 7.33 (t,  $J = 7.2$  Hz, 1H), 7.23 (d,  $J = 16.6$  Hz, 1H), 7.18 (d,  $J = 16.7$  Hz, 1H), 5.45 (s, 1H) ppm;  $^{13}\text{C NMR}$  (125 MHz, DMSO- $d_6$ )  $\delta$  159.2, 151.4, 138.1, 135.1, 134.4, 130.9, 130.6, 130.0, 129.4, 129.0, 128.9, 127.7, 127.0, 114.0, 112.4, 78.3, 46.3 ppm; HRMS (ESI)  $m/z$  calcd for  $\text{C}_{19}\text{H}_{15}\text{ClN}_3\text{O}_4^+$   $[\text{M}+\text{H}]^+$ : 352.0847, found 352.0845.

**(2*S*\*,3*R*\*)-3-(2-Bromophenyl)-2-carbamoyl-2-cyano-4-((*E*)-styryl)-2,3-dihydroazete 1-**

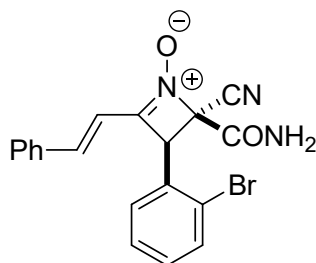

**oxide (3ar):** White solid; mp 161-163 °C; yield = 73%, dr = 88:12;  $R_f = 0.30$  (EtOAc/hexane = 30:70);  $^1\text{H NMR}$  (500 MHz, DMSO- $d_6$ )  $\delta$  7.95 (s, 1H), 7.87 (s, 1H), 7.71 (d,  $J = 7.7$  Hz, 1H), 7.65-7.58 (m, 2H), 7.45-7.29 (m, 6H), 7.23 (d,  $J = 16.5$  Hz, 1H), 7.17 (d,  $J = 16.5$  Hz, 1H), 5.40 (s, 1H) ppm;  $^{13}\text{C NMR}$  (125 MHz, DMSO- $d_6$ )  $\delta$  159.1, 151.6, 138.1, 135.1, 132.7, 131.2, 130.8, 130.5, 130.0, 129.1, 127.7, 127.5, 125.1, 114.0, 112.4, 78.2, 48.7 ppm; HRMS (ESI)  $m/z$  calcd for  $\text{C}_{19}\text{H}_{15}^{79}\text{BrN}_3\text{O}_2^+$   $[\text{M}+\text{H}]^+$ : 396.0342, found 396.0338; HRMS (ESI)  $m/z$  calcd for  $\text{C}_{19}\text{H}_{15}^{81}\text{BrN}_3\text{O}_2^+$   $[\text{M}+\text{H}]^+$ : 398.0322, found 396.0342.

**(2*S*\*,3*R*\*)-2-Carbamoyl-2-cyano-3-(2-nitrophenyl)-4-((*E*)-styryl)-2,3-dihydroazete 1-**

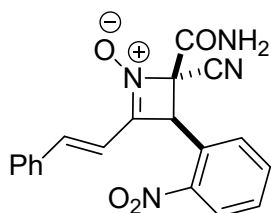

**oxide (3as):** White solid; mp 156-158 °C; yield = 74%; dr = 86:14;  $R_f = 0.29$  (EtOAc/hexane = 30:70);  $^1\text{H NMR}$  (500 MHz, DMSO- $d_6$ )  $\delta$  8.28-8.21 (m, 1H), 7.95 (s, 1H), 7.83 (s, 1H), 7.76 (t,  $J = 7.2$  Hz, 1H), 7.68 (t,  $J = 7.3$  Hz, 1H), 7.62-7.54 (m, 3H), 7.45-7.35 (m, 3H), 7.26-7.11 (m, 2H), 5.68 (s, 1H) ppm;  $^{13}\text{C NMR}$  (125 MHz, DMSO- $d_6$ )  $\delta$  159.2, 151.0, 148.3, 138.3, 135.1, 134.0, 132.1, 130.5, 130.0, 129.1, 127.7, 126.8, 125.3, 114.1, 112.1, 79.0, 45.8 ppm; HRMS (ESI)  $m/z$  calcd for  $\text{C}_{19}\text{H}_{15}\text{N}_4\text{O}_4^+$   $[\text{M}+\text{H}]^+$ : 363.1088, found 363.1080.

**(2*S*\*,3*R*\*)-2-Carbamoyl-2-cyano-3-(3-nitrophenyl)-4-((*E*)-styryl)-2,3-dihydroazete 1-**

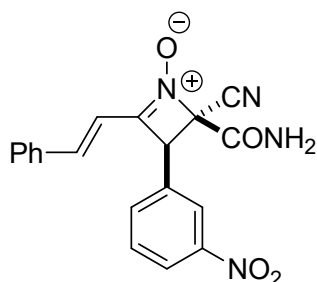

**oxide (3at):** White solid; mp 166-168 °C; yield = 79%; dr = 87:13;  $R_f = 0.30$  (EtOAc/hexane = 30:70);  $^1\text{H NMR}$  (500 MHz,  $\text{CDCl}_3$ )  $\delta$  8.28 (d,  $J = 7.9$  Hz, 1H), 8.19 (s, 1H), 7.69 (d,  $J = 7.5$  Hz, 1H), 7.62 (t,  $J = 7.9$  Hz, 1H), 7.44 (d,  $J = 7.1$  Hz, 2H), 7.38 (t,  $J = 6.4$

Hz, 3H), 7.10 (d,  $J = 16.5$  Hz, 1H), 7.03 (d,  $J = 16.5$  Hz, 1H), 5.67 (s, 1H), 4.94 (s, 1H) ppm;  $^{13}\text{C}$  NMR (125 MHz,  $\text{CDCl}_3$ )  $\delta$  159.6, 152.7, 148.8, 141.3, 134.9, 134.4, 132.6, 131.2, 130.6, 129.3, 128.1, 125.0, 123.5, 112.4, 110.6, 75.5, 49.6 ppm; HRMS (ESI)  $m/z$  calcd for  $\text{C}_{19}\text{H}_{15}\text{N}_4\text{O}_3^+ [\text{M}+\text{H}]^+$ : 363.1088, found 363.1087.

**(2*S*\*,3*R*\*)-2-Carbamoyl-2-cyano-3-(4-nitrophenyl)-4-((*E*)-styryl)-2,3-dihydroazete 1-**

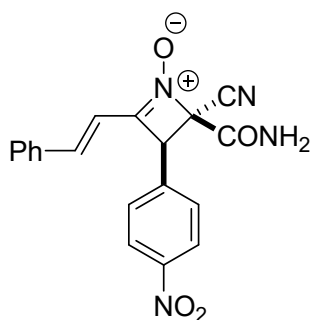

**oxide (3at')**: White solid; yield; mp 175-176 °C; dr = 81:19  $R_f = 0.27$  (EtOAc/hexane = 30:70);  $^1\text{H}$  NMR (500 MHz,  $\text{DMSO}-d_6$ )  $\delta$  8.24 (d,  $J = 8.5$  Hz, 2H), 8.00 (s, 1H), 7.97 (s, 1H), 7.68 (d,  $J = 8.5$  Hz, 2H), 7.62-7.56 (m, 2H), 7.42-7.32 (m, 3H), 7.20 (d,  $J = 16.5$  Hz, 1H), 7.08 (d,  $J = 16.5$  Hz, 1H), 5.49 (s, 1H) ppm;  $^{13}\text{C}$  NMR (125 MHz,  $\text{DMSO}-d_6$ )  $\delta$  159.4, 151.8, 147.8, 138.4, 138.0, 135.0, 131.1, 130.1, 129.1, 127.8, 123.4, 113.9, 112.0, 78.3, 47.3 ppm;

HRMS (ESI)  $m/z$  calcd for  $\text{C}_{19}\text{H}_{15}\text{N}_4\text{O}_3^+ [\text{M}+\text{H}]^+$ : 363.1088, found 363.1072.

**(2*S*\*,3*R*\*)-2-Carbamoyl-2-cyano-3-(naphthalen-2-yl)-4-((*E*)-styryl)-2,3-dihydroazete 1-**

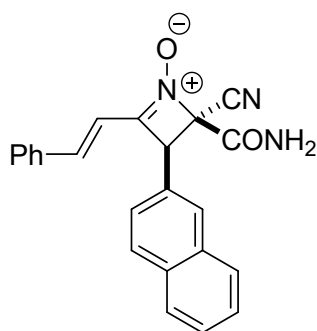

**oxide (3au)**: White solid; mp 160-162 °C; yield = 79%; dr = 86:14;  $R_f = 0.28$  (EtOAc/hexane = 30:70);  $^1\text{H}$  NMR (500 MHz,  $\text{DMSO}-d_6$ )  $\delta$  7.97 (s, 1H), 7.95-7.87 (m, 4H), 7.86 (s, 1H), 7.60-7.48 (m, 5H), 7.38-7.34 (m, 3H), 7.23 (d,  $J = 16.5$  Hz, 1H), 7.11 (d,  $J = 16.5$  Hz, 1H), 5.44 (s, 1H) ppm;  $^{13}\text{C}$  NMR (125 MHz,  $\text{DMSO}-d_6$ )  $\delta$  159.6, 152.3, 137.8, 135.0, 133.0, 132.5, 130.0, 129.1, 129.0, 128.3, 128.0, 127.9, 127.7(2C), 127.6, 126.8,

126.5, 114.3, 112.3, 78.7, 48.6 ppm; HRMS (ESI)  $m/z$  calcd for  $\text{C}_{23}\text{H}_{17}\text{N}_3\text{O}_2\text{Na}^+ [\text{M}+\text{Na}]^+$ : 390.1213, found 390.1218.

**(2*S*\*,3*R*\*)-2-Carbamoyl-2-cyano-3-(pyren-1-yl)-4-((*E*)-styryl)-2,3-dihydroazete 1-oxide**

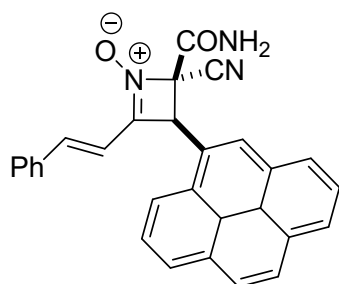

**(3av)**: White solid; mp 165-167 °C; yield = 71%; dr = 80:20;  $R_f = 0.25$  (EtOAc/hexane = 30:70);  $^1\text{H}$  NMR (500 MHz,  $\text{DMSO}-d_6$ )  $\delta$  8.43-8.34 (m, 4H), 8.25 (dd,  $J = 8.3, 3.6$  Hz, 2H), 8.20-8.12 (m, 2H), 8.09 (d,  $J = 7.7$  Hz, 1H), 7.92 (s, 1H), 7.69 (s, 1H), 7.61 (d,  $J = 3.3$  Hz, 2H), 7.38-7.34 (m, 4H), 7.22 (d,  $J = 16.4$  Hz, 1H), 6.44 (s, 1H) ppm;  $^{13}\text{C}$  NMR (125 MHz,  $\text{DMSO}-d_6$ )  $\delta$  159.6,

152.5, 138.1, 135.1, 131.2, 130.7, 130.2, 130.0, 129.8, 129.1, 128.4, 128.1, 127.7, 127.4, 127.2, 126.6, 125.9, 125.8, 124.4, 124.2, 124.0, 123.6, 122.8, 114.4, 112.7, 79.0, 46.2 ppm; HRMS (ESI)  $m/z$  calcd for  $\text{C}_{29}\text{H}_{20}\text{N}_3\text{O}_2^+ [\text{M}+\text{H}]^+$ : 442.1550, found 442.1538.

**(2*S*\*,3*R*\*)-2-Carbamoyl-2-cyano-3-(pyridin-3-yl)-4-((*E*)-styryl)-2,3-dihydroazete 1-oxide**

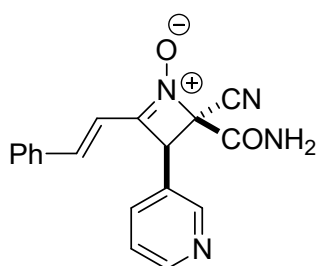

**(3aw):** White solid; mp 153-155 °C; yield = 80%; dr = 90:10;  $R_f$  = 0.15 (EtOAc/hexane = 30:70);  $^1\text{H}$  NMR (500 MHz, DMSO- $d_6$ )  $\delta$  8.61 (d,  $J$  = 1.9 Hz, 1H), 8.56 (dd,  $J$  = 4.7, 1.3 Hz, 1H), 8.01 (s, 1H), 7.99 (s, 1H), 7.77 (d,  $J$  = 7.9 Hz, 1H), 7.59 (dd,  $J$  = 6.4, 2.7 Hz, 2H), 7.43-7.35 (m, 4H), 7.18 (d,  $J$  = 16.5 Hz, 1H), 7.08 (d,  $J$  = 16.5 Hz, 1H), 5.35 (s, 1H) ppm;  $^{13}\text{C}$  NMR (125 MHz, DMSO- $d_6$ )

$\delta$  159.6, 151.7, 150.5, 150.0, 137.9, 137.0, 135.0, 130.1, 129.1, 127.7, 126.9, 123.4, 114.0, 112.1, 78.5, 45.8 ppm; HRMS (ESI)  $m/z$  calcd for  $\text{C}_{18}\text{H}_{14}\text{N}_4\text{O}_2\text{Na}^+$   $[\text{M}+\text{Na}]^+$ : 341.1009, found 341.1025.

**(*E*)-2-Carbamoyl-2-cyano-3-(9-methyl-9H-carbazol-3-yl)-4-styryl-2,3-dihydroazete 1-oxide (3ax):**

Orange solid; mp 120-122 °C; yield = 75%; dr = 77:23;  $R_f$  = 0.30 (EtOAc/Hexane = 30/70);  $^1\text{H}$  NMR (400 MHz,  $\text{CDCl}_3$ )  $\delta$  (mixture of diastereomers) 8.15-

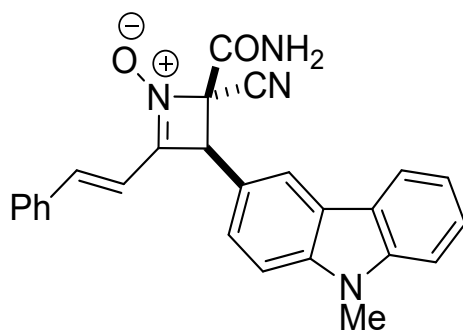

8.01 (m, 2.0H), 7.53-7.46 (m, 2H), 7.43-7.33 (m, 8H), 7.19-7.07 (m, 3H), 5.98 (s, 0.25H), 5.69 (s, 0.75H), 5.04 (s, 0.75H), 4.99 (s, 0.25H), 3.87 (s, 0.75H), 3.84 (s, 2.25H) ppm;  $^{13}\text{C}$  NMR (125 MHz,  $\text{CDCl}_3$ ) (mixture of diastereomer) 160.4 (161.9), 154.6 (154.1), 141.6\*, 141.5\*, 141.1 (140.9), 134.7 (134.8), 130.8 (130.7), 129.2\*, 128.0 (127.9), 126.6

(126.57), 126.0 (125.8), 123.4 (123.6), 122.3 (122.4), 120.9 (121.0), 120.7 (120.8), 119.8\*, 119.61 (119.59), 113.2\*, 111.16 (111.24), 109.4 (109.5), 108.91 (108.87), 76.8 (60.6), 51.7 (49.3), 31.1 (29.3) ppm; HRMS (ESI)  $m/z$  calcd for  $\text{C}_{26}\text{H}_{21}\text{N}_4\text{O}_2^+$   $[\text{M}+\text{H}]^+$ : 421.1659, found 421.1670. \* Indicates overlap peaks; In parentheses indicate the peaks of minor isomer.

**(2*S*\*,3*R*\*)-3-Butyl-2-carbamoyl-2-cyano-4-((*E*)-styryl)-2,3-dihydroazete 1-oxide (3ay):**

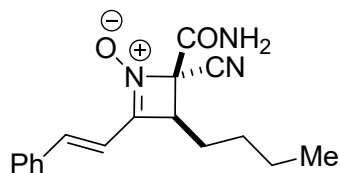

White solid; mp 146-148 °C; yield = 51%; dr = 78:22;  $R_f$  = 0.20 (EtOAc/ hexane = 30:70);  $^1\text{H}$  NMR (500 MHz,  $\text{CDCl}_3$ )  $\delta$  7.61 (d,  $J$  = 16.4 Hz, 1H), 7.51 (d,  $J$  = 3.8 Hz, 2H), 7.43-7.36 (m, 4H), 6.79 (d,  $J$  = 16.5 Hz, 1H), 5.95 (s, 1H), 3.61 (t,  $J$  = 6.8 Hz, 1H), 2.00-1.87 (m, 1H), 1.85-1.74 (m, 1H), 1.60-1.44 (m,

3H), 1.39 (m, 2H) ppm;  $^{13}\text{C}$  NMR (125 MHz,  $\text{CDCl}_3$ )  $\delta$  161.4, 155.4, 141.1, 134.9, 130.8, 129.3, 127.9, 113.2, 111.6, 73.7, 46.6, 29.2, 27.6, 22.7, 13.9 ppm; HRMS (ESI)  $m/z$  calcd for  $\text{C}_{17}\text{H}_{19}\text{N}_3\text{O}_2\text{Na}^+$   $[\text{M}+\text{Na}]^+$ : 330.1369, found 330.1361.

**(2*S*\*,3*R*\*)-2-Carbamoyl-2-cyano-3-isopropyl-4-((*E*)-styryl)-2,3-dihydroazete 1-oxide**

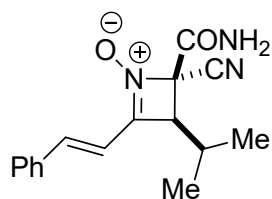

**(3az):** White solid; mp 131-133 °C; yield = 49%; dr = 78:22;  $R_f$  = 0.2

(EtOAc/hexane = 30:70);  $^1\text{H NMR}$  (500 MHz,  $\text{CDCl}_3$ )  $\delta$  7.51 (d,  $J$  = 6.1 Hz, 2H), 7.45-7.37 (m, 3H), 7.07 (d,  $J$  = 16.6 Hz, 1H), 6.95 (d,  $J$  = 16.5 Hz, 1H), 6.66 (s, 1H), 5.86 (s, 1H), 3.97 (d,  $J$  = 2.0 Hz, 1H), 2.42-2.33 (m, 1H), 1.15 (d,  $J$  = 6.5 Hz, 3H), 0.91 (d,  $J$  = 6.5 Hz, 3H)

ppm;  $^{13}\text{C NMR}$  (125 MHz,  $\text{DMSO-}d_6$ )  $\delta$  162.9, 161.9, 141.3, 135.0, 129.7, 128.9, 127.5, 118.2, 115.8, 84.5, 60.3, 27.3, 22.0, 18.3 ppm; HRMS (ESI)  $m/z$  calcd for  $\text{C}_{16}\text{H}_{17}\text{N}_3\text{O}_2\text{Na}^+$   $[\text{M}+\text{Na}]^+$ : 306.1213, found 306.1204.

**(2*S*\*,3*R*\*)-4-((*E*)-4-(*tert*-Butyl)styryl)-2-carbamoyl-2-cyano-3-phenyl-2,3-dihydroazete**

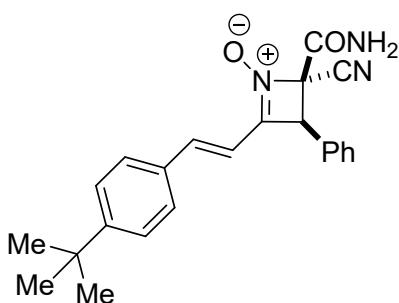

**1-oxide (3ba):** White solid; mp 166-168 °C; yield = 81%; dr

= 85:15;  $R_f$  = 0.30 (EtOAc/hexane = 30:70);  $^1\text{H NMR}$  (500 MHz,  $\text{CDCl}_3$ )  $\delta$  7.40-7.33 (m, 7H), 7.32-7.28 (m, 2H), 7.15 (s, 1H) 7.07 (d,  $J$  = 16.5 Hz, 1H), 7.00 (d,  $J$  = 16.5 Hz, 1H), 5.78 (s, 1H), 4.82 (s, 1H), 1.31 (s, 9H) ppm;  $^{13}\text{C NMR}$  (125 MHz,  $\text{CDCl}_3$ )  $\delta$  160.3, 154.8, 154.1, 141.1, 131.9, 130.1,

130.0, 129.3, 128.9, 127.9, 126.3, 113.0, 110.2, 75.9, 50.8, 35.1, 31.2 ppm; HRMS (ESI)  $m/z$  calcd for  $\text{C}_{23}\text{H}_{24}\text{N}_3\text{O}_2^+$   $[\text{M}+\text{H}]^+$ : 374.1863, found 374.1875.

**(2*S*\*,3*R*\*)-4-((*E*)-4-(*tert*-Butyl)styryl)-2-carbamoyl-2-cyano-3-(4-methoxyphenyl)-2,3-**

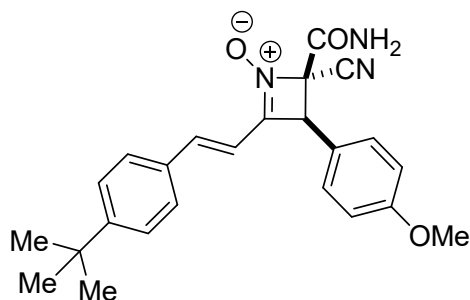

**dihydroazete 1-oxide (3bc):** White solid; mp 170-

172 °C; yield = 78%; dr = 87:13;  $R_f$  = 0.22 (EtOAc/hexane = 30:70);  $^1\text{H NMR}$  (500 MHz,  $\text{CDCl}_3$ )  $\delta$  7.38 (br s, 4H), 7.22 (d,  $J$  = 8.7 Hz, 2H), 7.14 (s, 1H), 7.06 (d,  $J$  = 16.4 Hz, 1H), 7.00 (d,  $J$  = 16.4 Hz, 1H), 6.89 (d,  $J$  = 8.7 Hz, 2H), 5.71 (s, 1H),

4.79 (s, 1H), 3.80 (s, 3H), 1.31 (s, 9H);  $^{13}\text{C NMR}$  (125 MHz,  $\text{CDCl}_3$ )  $\delta$  160.9, 160.3, 154.8, 154.1, 141.0, 132.2, 130.2, 127.9, 126.3, 122.0, 114.9, 113.2, 110.4, 76.3, 55.5, 50.8, 35.2, 31.3 ppm; HRMS (ESI)  $m/z$  calcd for  $\text{C}_{24}\text{H}_{25}\text{N}_3\text{O}_3\text{Na}^+$   $[\text{M}+\text{Na}]^+$ : 426.1788, found 426.1772.

**(2*S*\*,3*R*\*)-2-Carbamoyl-4-((*E*)-4-chlorostyryl)-2-cyano-3-phenyl-2,3-dihydroazete 1-**

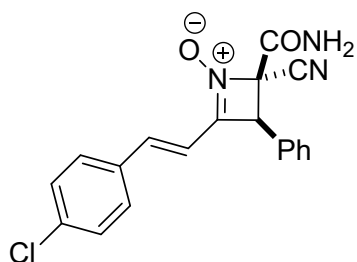

**oxide (3ca):** White solid; mp 156-158 °C; yield = 79%; dr =

83:17;  $R_f$  = 0.30 (EtOAc/hexane = 30:70);  $^1\text{H NMR}$  (500 MHz,  $\text{CDCl}_3$ )  $\delta$  7.41 (d,  $J$  = 5.6 Hz, 3H), 7.39-7.29 (m, 6H), 7.11 (s, 1H), 7.10 (d,  $J$  = 16.0 Hz), 6.97 (d,  $J$  = 16.4 Hz, 1H),

5.65 (s, 1H), 4.82 (s, 1H) ppm;  $^{13}\text{C}$  NMR (125 MHz,  $\text{CDCl}_3$ )  $\delta$  159.9, 153.5, 139.5, 136.8, 133.2, 130.1, 130.0, 129.6, 129.4, 129.1, 128.8, 112.9, 111.4, 76.2, 50.9 ppm; HRMS (ESI)  $m/z$  calcd for  $\text{C}_{19}\text{H}_{15}\text{ClN}_3\text{O}_2^+[\text{M}+\text{H}]^+$ : 352.0847, found 352.0859.

**(2*S*\*,3*R*\*)-2-Carbamoyl-4-((*E*)-4-chlorostyryl)-2-cyano-3-(4-methylphenyl)-2,3-**

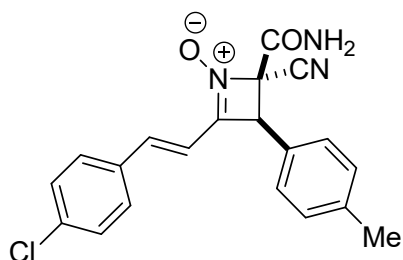

**dihydroazete 1-oxide (3cb):** White solid; mp 153-155 °C; yield = 77%; dr = 80:20;  $R_f$  = 0.26 (EtOAc/hexane = 30:70);  $^1\text{H}$  NMR (500 MHz,  $\text{CDCl}_3$ )  $\delta$  7.36 (d,  $J$  = 8.7 Hz, 2H), 7.33 (d,  $J$  = 8.7 Hz, 2H), 7.19 (br s, 4H), 7.09 (s, 1H) 7.08 (d,  $J$  = 16.4 Hz), 6.96 (d,  $J$  = 16.5 Hz, 1H), 5.76 (s, 1H), 4.78 (s, 1H), 2.35 (s, 3H) ppm;  $^{13}\text{C}$  NMR (125 MHz,

$\text{CDCl}_3$ )  $\delta$  160.1, 153.7, 140.2, 139.4, 136.8, 133.2, 130.1, 129.5, 129.0, 128.7, 126.8, 112.9, 111.5, 76.3, 50.7, 21.5 ppm; HRMS (ESI)  $m/z$  calcd for  $\text{C}_{20}\text{H}_{17}\text{ClN}_3\text{O}_2^+ [\text{M}+\text{H}]^+$ : 366.1004, found 366.1015.

**(2*S*\*,3*R*\*)-3-(4-Bromophenyl)-2-carbamoyl-4-((*E*)-4-chlorostyryl)-2-cyano-2,3-**

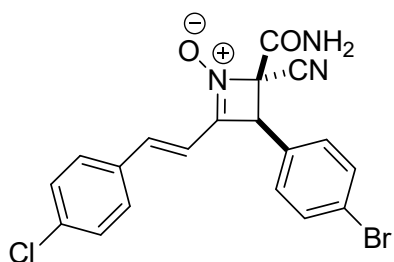

**dihydroazete 1-oxide (3cl):** White solid; mp 165-167 °C; yield = 76%; dr = 88:12;  $R_f$  = 0.30 (EtOAc/hexane = 30:70);  $^1\text{H}$  NMR (500 MHz,  $\text{DMSO}-d_6$ )  $\delta$  7.94 (s, 1H), 7.93 (s, 1H), 7.64 (d,  $J$  = 8.2 Hz, 2H), 7.58 (d,  $J$  = 8.0 Hz, 2H), 7.42 (d,  $J$  = 8.0 Hz, 2H), 7.33 (d,  $J$  = 8.1 Hz, 2H), 7.17 (d,  $J$  = 16.5 Hz, 1H), 7.07 (d,  $J$  = 16.5 Hz, 1H), 5.26 (s, 1H) ppm;  $^{13}\text{C}$

NMR (125 MHz,  $\text{DMSO}-d_6$ )  $\delta$  159.5, 151.8, 136.3, 134.4, 134.0, 131.7, 131.4, 130.1, 129.4, 129.1, 122.5, 114.0, 112.9, 78.5, 47.7 ppm; HRMS (ESI)  $m/z$  calcd for  $\text{C}_{19}\text{H}_{14}^{79}\text{BrClN}_3\text{O}_2^+[\text{M}+\text{H}]^+$ : 329.9952, found 329.9963.

**(2*S*\*,3*R*\*)-2-Carbamoyl-4-((*E*)-4-chlorostyryl)-2-cyano-3-(2,5-dimethoxyphenyl)-2,3-**

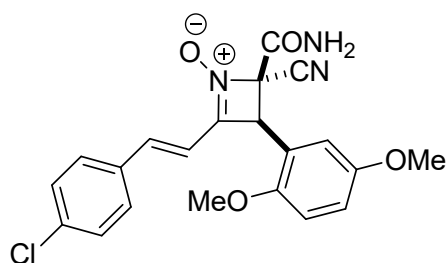

**dihydroazete 1-oxide (3cf):** White solid; mp 169-171 °C; yield = 73%; yield = 76%; dr = 87:13;  $R_f$  = 0.20 (EtOAc/hexane = 30:70);  $^1\text{H}$  NMR (500 MHz,  $\text{CDCl}_3$ )  $\delta$  7.38 (d,  $J$  = 8.5 Hz, 2H), 7.33 (d,  $J$  = 8.5 Hz, 2H), 7.13 (d,  $J$  = 16.4 Hz, 1H), 6.99 (d,  $J$  = 16.5 Hz, 1H), 6.92 (s, 1H), 6.89-6.84 (m, 2H), 6.69 (d,  $J$  = 2.0 Hz,

1H), 5.76 (s, 1H), 5.09 (s, 1H), 3.85 (s, 3H), 3.69 (s, 3H) ppm;  $^{13}\text{C}$  NMR (125 MHz,  $\text{CDCl}_3$ )  $\delta$  160.1, 153.5, 153.1, 152.7, 138.8, 136.6, 133.4, 129.5, 129.0, 119.6, 115.6, 114.9, 113.1,

112.0, 111.9, 76.0, 56.4, 55.9, 45.9 ppm; HRMS (ESI)  $m/z$  calcd for  $C_{21}H_{19}ClN_3O_4^+[M+H]^+$ : 412.1059, found 412.1056.

**Ethyl 3-amino-3-oxo-2-[phenyl(5-phenylisoxazol-3-yl)methyl]propanoate (3aaa):** White

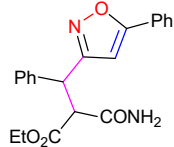

Solid, Yield = 28%; mp = 160 °C;  $R_f$  = 0.30 (Ethyl acetate/hexane = 40:60); dr = 60:40;  $^1H$  NMR (500 MHz, DMSO)  $\delta$  (major isomer) 7.78 – 7.74 (m, 2H), 7.55-7.44 (m, 3H), 7.40 – 7.21 (m, 6H), 7.17 (s, 1H), 6.98 (s, 1H), 4.79 (d,  $J$  = 12.0 Hz, 1H), 4.32 (d,  $J$  = 12.0 Hz, 1H), 3.88 (q, 6.9 Hz, 2H), 0.91 (t,  $J$  = 7.0 Hz, 3H);  $^1H$  NMR (500 MHz, DMSO)  $\delta$  (mixture of diastereomer = 66:34) 7.78 -7.71 (m, 2H), 7.65 (s, 0.34H), 7.54-7.45 (m, 2.66H), 7.43-7.26 (m, 5H), 7.25-7.22 (m, 1H), 7.16 (s, 0.66H), 7.00 (s, 0.34H), 6.98 (s, 0.66H), 6.90 (s, 0.34H), 4.84-4.72 (m, 1H), 4.38 (d,  $J$  = 12.2 Hz, 0.34 H), 4.32 (d,  $J$  = 12.2 Hz, 0.66H), 4.05 (q,  $J$  = 6.1 Hz, 0.68H), 3.88 (q,  $J$  = 6.5, 1.32H), 1.09 (t,  $J$  = 6.7 Hz, 1.02H), 0.91 (t,  $J$  = 6.8 Hz, 1.98H) ppm;  $^{13}C$  NMR (125 MHz, DMSO)  $\delta$  (major isomer) 168.6, 167.8, 167.2, 164.9, 138.9, 130.4, 129.3, 128.6, 128.3, 127.3, 126.7, 125.4, 100.2, 60.6, 56.1, 42.9, 13.7 ppm; HRMS (ESI)  $m/z$  calcd for  $C_{21}H_{20}N_2O_4Na^+[M+Na]^+$ : 387.1315, found 387.1288.

**One-pot sequential synthesis of isoxazole 4:** To a stirred solution of 3-nitroallylarene **1** (0.2 mmol) and alkylidene malononitrile **2** (0.24 mmol) in dry DCM (1.0 mL) under an argon atmosphere was added DABCO (0.03 mmol, 10 mol%) at room temperature. The progress of the reaction was monitored by TLC. After completion of the reaction, pTSA (50 mol%) was added to the above reaction mixture and stirring was continued for 12-16h. Afterwards, the reaction mixture was extracted with ethyl acetate (3  $\times$  10 mL), washed with saturated  $NaHCO_3$  solution, brine and dried over anhydrous  $Na_2SO_4$ . Evaporation of the solvent left the crude product which was purified by silica gel column chromatography using ethyl acetate/hexane (1:9) as an eluent, leading to a pure isoxazole **4**. All the products in Scheme 3 were synthesized by the above procedure and characterized by their spectroscopic data ( $^1H$ ,  $^{13}C$  NMR and HRMS data).

**(E)-4-Phenyl-3-styrylisoxazole-5-carboxamide (4a):** White solid; yield = 82%; mp 151-154

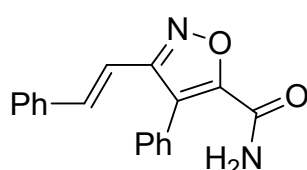

°C;  $R_f$  = 0.35 (EtOAc/hexane = 30:70);  $^1H$  NMR (500 MHz,  $CDCl_3$ )  $\delta$  7.52-7.42 (m, 8H), 7.39-7.31 (m, 3H), 6.84 (d,  $J$  = 16.5 Hz, 1H), 6.67 (s, 1H), 5.68 (s, 1H) ppm;  $^{13}C$  NMR (125 MHz,  $CDCl_3$ )  $\delta$  166.5, 160.9, 155.5, 135.9, 135.5, 130.5, 129.6, 129.0, 128.6, 128.4, 127.4, 117.8, 111.7 ppm; HRMS (ESI)  $m/z$  calcd for  $C_{18}H_{14}N_2O_2Na^+[M+Na]^+$ : 313.0947, found 313.0953.



**(E)-4-(4-Methoxyphenyl)-3-styrylisoxazole-5-carboxamide(4b):** White solid; yield = 80%; mp 154-156 °C;  $R_f = 0.30$  (EtOAc/hexane = 30:70);  $^1\text{H NMR}$  (500 MHz, DMSO- $d_6$ )  $\delta$

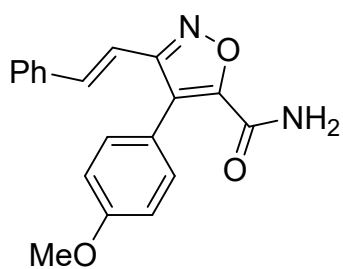

8.25 (s, 1H), 7.89 (s, 1H), 7.64 (d,  $J = 7.1$  Hz, 2H), 7.51 (d,  $J = 16.4$  Hz, 1H), 7.40-7.30 (m, 5H), 7.05 (d,  $J = 8.3$  Hz, 2H), 6.99 (d,  $J = 16.5$  Hz, 1H), 3.81 (s, 3H) ppm;  $^{13}\text{C NMR}$  (125 MHz, DMSO- $d_6$ )  $\delta$  163.5, 161.4, 159.2, 158.1, 135.2, 135.0, 130.8, 129.4, 128.9, 127.4, 120.3, 116.0, 114.2, 111.6, 55.2 ppm; HRMS (ESI)  $m/z$  calcd for  $\text{C}_{19}\text{H}_{16}\text{N}_2\text{O}_3\text{Na}^+$  [ $\text{M}+\text{Na}$ ] $^+$  :

343.1053, found 343.1064.

**(E)-4-(4-Methylthiophenyl)-3-styrylisoxazole-5-carboxamide (4c):** White solid; mp 165-167 °C; yield = 80%,  $R_f = 0.33$  (EtOAc/hexane = 30:70);  $^1\text{H NMR}$  (500 MHz,  $\text{CDCl}_3$ )  $\delta$

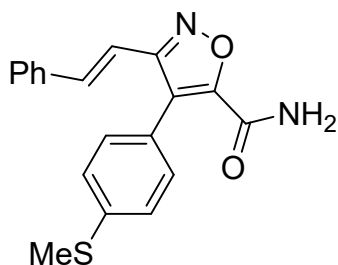

7.53-7.46 (m, 3H), 7.38-7.31 (m, 7H), 6.83 (d,  $J = 16.4$  Hz, 1H), 6.68 (s, 1H), 5.63 (s, 1H), 2.53 (s, 3H) ppm;  $^{13}\text{C NMR}$  (125 MHz,  $\text{CDCl}_3$ )  $\delta$  166.4, 160.9, 155.4, 139.4, 135.9, 135.5, 130.9, 129.6, 129.101, 127.4, 126.2, 124.8, 117.3, 111.6, 15.6 ppm; HRMS (ESI)  $m/z$  calcd for  $\text{C}_{19}\text{H}_{16}\text{N}_2\text{O}_2\text{SNa}^+$  [ $\text{M}+\text{Na}$ ] $^+$  :

359.0825, found 359.0827.

**(E)-4-([1,1'-1'-Biphenyl]-4-yl)-3-styrylisoxazole-5-carboxamide (4d):** White solid; mp 199-201 °C; yield = 81%;  $R_f = 0.34$  (EtOAc/hexane = 30:70);  $^1\text{H NMR}$  (500 MHz,  $\text{CDCl}_3$ )  $\delta$

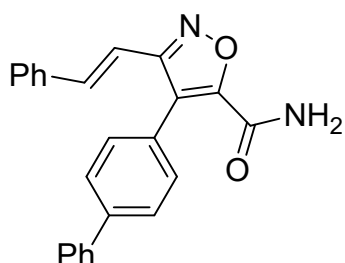

7.71-7.64 (m, 3H), 7.55-7.44 (m, 7H), 7.40-7.32 (m, 5H), 6.89 (d,  $J = 16.4$  Hz, 1H), 6.71 (s, 1H), 5.67 (s, 1H) ppm;  $^{13}\text{C NMR}$  (125 MHz,  $\text{CDCl}_3$ )  $\delta$  166.5, 160.9, 155.5, 141.4, 140.7, 136.0, 135.6, 130.9, 129.6, 129.1, 129.0, 128.4, 127.7, 127.5, 127.3, 127.1, 117.5, 111.7 ppm;

HRMS (ESI)  $m/z$  calcd for  $\text{C}_{24}\text{H}_{18}\text{N}_2\text{O}_2\text{Na}^+$  [ $\text{M}+\text{Na}$ ] $^+$  : 389.1260, found 389.1261.

**(E)-4-(4-Fluorophenyl)-3-styrylisoxazole-5-carboxamide (4e):** White solid; mp 174-176 °C; yield = 83%,  $R_f = 0.35$  (EtOAc/hexane = 30:70);  $^1\text{H NMR}$  (500 MHz, DMSO- $d_6$ )  $\delta$

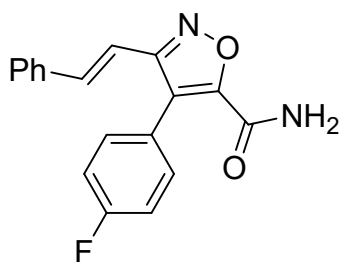

8.27 (s, 1H), 7.92 (s, 1H), 7.66 (d,  $J = 7.1$  Hz, 2H), 7.58-7.45 (m, 3H), 7.42-7.32 (m, 5H), 6.99 (d,  $J = 16.5$  Hz, 1H) ppm;  $^{13}\text{C NMR}$  (125 MHz, DMSO- $d_6$ )  $\delta$  164.2, 163.0, 162.0 (d,  $J_{\text{C-F}} = 243.86$  Hz), 157.8, 135.5, 135.1, 131.8 (d,  $J_{\text{C-F}} = 8.4$  Hz), 129.5, 128.9, 127.6, 124.6 (d,  $J_{\text{C-F}} = 3.2$  Hz),

115.5 (d,  $J_{\text{C-F}} = 21.35$  Hz), 115.3, 111.3 ppm;  $^{19}\text{F NMR}$  (470 MHz, DMSO- $d_6$ )  $\delta$  -113.78 ppm; HRMS (ESI)  $m/z$  calcd for  $\text{C}_{18}\text{H}_{13}\text{FN}_2\text{O}_2\text{Na}^+$  [ $\text{M}+\text{Na}$ ] $^+$  : 331.0853, found 331.0862.

**(E)-4-(4-Bromophenyl)-3-styrylisoxazole-5-carboxamide (4f):** White solid; yield = 81%;

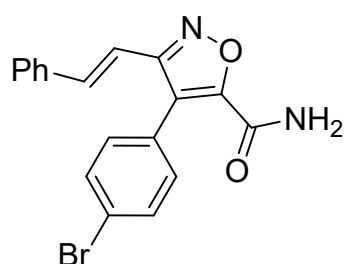

mp 208-210 °C;  $R_f$  = 0.35 (EtOAc/hexane = 30:70);  $^1\text{H NMR}$  (500 MHz,  $\text{DMSO-}d_6$ )  $\delta$  8.28 (s, 1H), 7.92 (s, 1H), 7.68 (d,  $J$  = 8.3 Hz, 4H), 7.54 (d,  $J$  = 16.4 Hz, 1H), 7.45-7.32 (m, 5H), 7.01 (d,  $J$  = 16.4 Hz, 1H) ppm;  $^{13}\text{C NMR}$  (125 MHz,  $\text{DMSO-}d_6$ ),  $\delta$  164.3, 161.0, 157.7, 135.8, 135.1, 131.7(2C), 131.5, 129.5, 128.9, 127.6, 121.6, 115.2, 111.2 ppm; HRMS (ESI)

$m/z$  calcd for  $\text{C}_{18}\text{H}_{13}\text{N}_2\text{O}_2^{79}\text{BrNa}^+[\text{M}+\text{Na}]^+$ : 391.0053, found 391.0056; HRMS (ESI)  $m/z$  calcd for  $\text{C}_{18}\text{H}_{13}\text{N}_2\text{O}_2^{81}\text{BrNa}^+[\text{M}+\text{Na}]^+$ : 393.0032, found 393.0034.

**(E)-3-Styryl-4-(4-(trifluoromethyl)phenyl)isoxazole-5-carboxamide (4g):** White solid; mp 207-209 °C; yield = 77%;  $R_f$  = 0.35; (EtOAc/hexane = 30:70);  $^1\text{H NMR}$  (500 MHz,

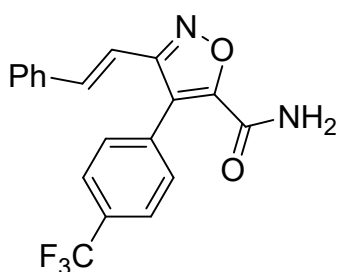

$\text{CDCl}_3$ )  $\delta$  7.72 (d,  $J$  = 8.1 Hz, 2H), 7.58 (d,  $J$  = 8.1 Hz, 2H), 7.54 (d,  $J$  = 16.4 Hz, 1H), 7.50-7.46 (m, 2H), 7.40-7.35 (m, 3H), 6.79 (d,  $J$  = 16.4 Hz, 1H), 6.74 (s, 1H), 5.65 (s, 1H) ppm;  $^{13}\text{C NMR}$  (125 MHz,  $\text{CDCl}_3$ )  $\delta$  166.9, 160.6, 155.2, 136.9, 135.2, 132.3, 130.9, 129.9, 129.1, 127.5, 125.5 (q), 125.3, 123.1, 116.5, 110.9 ppm; HRMS (ESI)  $m/z$  calcd for

$\text{C}_{19}\text{H}_{13}\text{F}_3\text{N}_2\text{O}_2\text{Na}^+[\text{M}+\text{Na}]^+$ : 381.0821, found 381.0830.

**(E)-4-(4-Cyanophenyl)-3-styrylisoxazole-5-carboxamide (4h):** White solid; mp 209-211

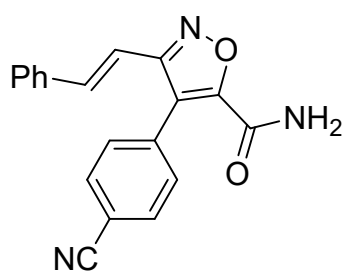

°C; yield = 80%;  $R_f$  = 0.30 (EtOAc/hexane = 30:70);  $^1\text{H NMR}$  (500 MHz,  $\text{CDCl}_3$ )  $\delta$  7.75 (d,  $J$  = 8.5 Hz, 2H), 7.60-7.56 (m, 2H), 7.54 (d,  $J$  = 16.4 Hz, 1H), 7.48 (dd,  $J$  = 7.7, 1.6 Hz, 2H), 7.41-7.36 (m, 3H), 6.75 (d,  $J$  = 16.4 Hz, 1H), 6.75 (s, 1H), 5.65 (s, 1H) ppm;  $^{13}\text{C NMR}$  (125 MHz,  $\text{DMSO-}d_6$ )  $\delta$  164.9, 160.8, 157.5, 136.4, 135.0, 133.5, 132.4, 130.6, 129.7, 128.9, 127.8,

118.7, 114.9, 111.0, 110.7 ppm; HRMS (ESI)  $m/z$  calcd for  $\text{C}_{19}\text{H}_{13}\text{N}_3\text{O}_2\text{Na}^+[\text{M}+\text{Na}]^+$ : 338.0900, found 338.0898.

**(E)-2-Carbamoyl-2-cyano-3-(4-nitrophenyl)-4-styryl-2,3-dihydroazete oxide (4i):** White

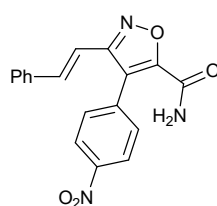

solid; yield = 78%; mp 175-176 °C;  $R_f$  = 0.27; (EtOAc/hexane = 40:60);  $^1\text{H NMR}$  (500 MHz,  $\text{DMSO-}d_6$ )  $\delta$  8.24 (d,  $J$  = 8.5 Hz, 2H), 8.00 (s, 1H), 7.97 (s, 1H), 7.68 (d,  $J$  = 8.5 Hz, 2H), 7.62-7.56 (m, 2H), 7.42-7.32 (m, 3H), 7.20 (d,  $J$  = 16.5 Hz, 1H), 7.08 (d,  $J$  = 16.5 Hz, 1H), 5.49 (s, 1H) ppm;  $^{13}\text{C NMR}$  (125 MHz,  $\text{DMSO-}d_6$ )  $\delta$  159.4, 151.8, 147.8, 138.4,

138.0, 135.0, 131.1, 130.1, 129.1, 127.8, 123.4, 113.9, 112.0, 78.3, 47.3 ppm; HRMS (ESI)  $m/z$  calcd for  $C_{19}H_{14}N_4O_4Na^+$   $[M+Na]^+$ : 358.0798, found 358.0805.

**(E)-4-(4-(Phenylethynyl)phenyl)-3-styrylisoxazole-5-carboxamide (4j):** White solid; mp

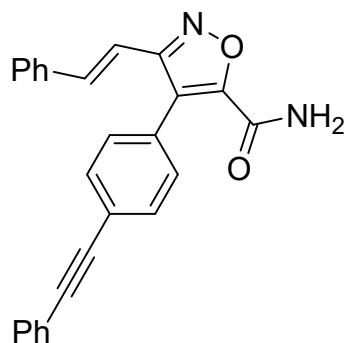

194-196 °C; yield = 79%;  $R_f$  = 0.34; (EtOAc/hexane = 30:70);

$^1H$  NMR (500 MHz, DMSO- $d_6$ )  $\delta$  8.31 (s, 1H), 7.95 (s, 1H), 7.72-7.55 (m, 3H), 7.55-7.48 (m, 3H), 7.55-7.48 (m, 2H), 7.47 – 7.32 (m, 7H), 7.05(d,  $J$  = 16.4 Hz, 1H) ppm;  $^{13}C$  NMR (125 MHz, DMSO- $d_6$ )  $\delta$  164.3, 161.1, 157.9, 135.9, 135.1, 131.6, 131.5, 130.0, 129.6, 129.0, 128.95, 128.90, 128.7, 127.7, 122.2 122.0, 115.6, 111.3, 90.3, 89.1 ppm; HRMS (ESI)  $m/z$  calcd for

$C_{26}H_{18}N_2O_2Na^+$   $[M+Na]^+$ : 413.1260, found 413.1254.

**(E)-4-(4-(Benzyloxy)-3-methoxyphenyl)-3-styrylisoxazole-5-carboxamide(4k):** White

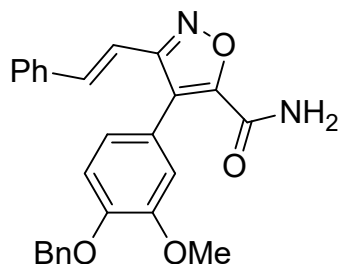

solid; mp 179-181 °C; yield = 76%,  $R_f$  = 0.30 (EtOAc/hexane =

30:70);  $^1H$  NMR (500 MHz, DMSO- $d_6$ )  $\delta$  8.25 (s, 1H), 7.91 (s, 1H), 7.66 (d,  $J$  = 7.3 Hz, 2H), 7.55–7.28 (m, 9H), 7.15 (d,  $J$  = 8.2 Hz, 1H), 7.10 (s, 1H), 7.05 (d,  $J$  = 16.5 Hz, 1H), 6.98 (d,  $J$  = 7.9 Hz, 1H), 5.14 (s, 2H), 3.79 (s, 3H) ppm;  $^{13}C$  NMR (125 MHz,

DMSO- $d_6$ )  $\delta$  163.5, 161.5, 158.3, 148.8, 147.9, 137.0, 135.2, 135.0, 129.4, 128.9, 128.5, 128.0, 127.9, 127.5, 122.0, 120.9, 116.1, 113.6, 113.4, 111.7, 69.9, 55.6 ppm; HRMS (ESI)  $m/z$  calcd for  $C_{26}H_{22}N_2O_4Na^+$   $[M+Na]^+$ : 449.1472, found 449.1477.

**(E)-4-(2-Chlorophenyl)-3-styrylisoxazole-5-carboxamide (4l):** White solid; mp 174-176

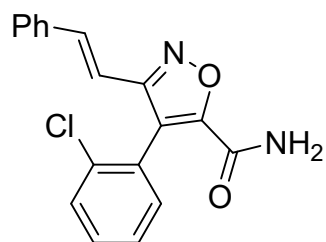

°C; yield = 77%;  $R_f$  = 0.35 (EtOAc/hexane = 30:70);  $^1H$

NMR (500 MHz, DMSO- $d_6$ )  $\delta$  8.18 (s, 1H), 7.78 (s, 1H), 7.66-7.54 (m, 3H), 7.52-7.42 (m, 4H), 7.38-7.30 (m, 3H), 6.81 (d,  $J$  = 16.5 Hz, 1H) ppm;  $^{13}C$  NMR (125 MHz, DMSO- $d_6$ )  $\delta$  165.3, 160.3, 157.8, 135.5, 134.9, 133.6, 132.4, 130.2, 129.6, 129.4, 128.9, 127.7, 127.5, 127.2, 114.0, 111.3 ppm;

HRMS (ESI)  $m/z$  calcd for  $C_{19}H_{15}ClN_3O_4^+$   $[M+Na]^+$ : 347.0588, found 347.0536

**(E)-4-(3-Nitrophenyl)-3-styrylisoxazole-5-carboxamide (4m):** White solid; mp 191-193

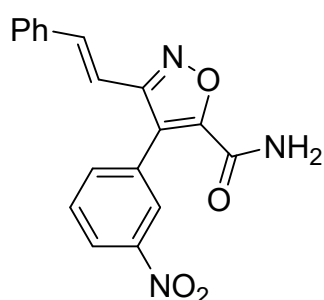

°C; yield = 78%;  $R_f$  = 0.33 (EtOAc/hexane = 30:70);  $^1H$  NMR

(500 MHz, DMSO- $d_6$ )  $\delta$  8.39-8.20 (m, 3H), 7.91 (d,  $J$  = 7.4 Hz, 1H), 7.77 (t,  $J$  = 8.2 Hz, 1H), 7.69 (d,  $J$  = 6.9 Hz, 2H), 7.58 (d,  $J$  = 16.4 Hz, 1H), 7.46-7.30 (m, 3H), 7.07 (d,  $J$  = 16.4 Hz, 1H)

ppm;  $^{13}\text{C}$  NMR (125 MHz, DMSO- $d_6$ )  $\delta$  165.2, 160.7, 157.3, 147.8, 136.5, 136.4, 135.1, 130.1, 130.0, 129.7, 128.9, 127.7, 124.6, 122.9, 114.4, 111.0 ppm; HRMS (ESI)  $m/z$  calcd for  $\text{C}_{18}\text{H}_{13}\text{N}_3\text{O}_4\text{Na}^+[\text{M}+\text{Na}]^+$ : 358.0798 found 358.0779.

**(E)-3-Styryl-4-(thiophen-2-yl)isoxazole-5-carboxamide (4n):** White solid; mp 166-168 °C;

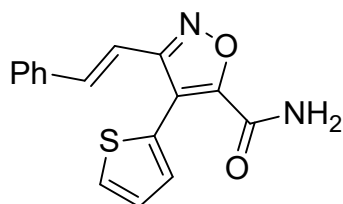

yield = 76%;  $R_f$  = 0.36 (EtOAc/hexane = 30:70);  $^1\text{H}$  NMR (500 MHz,  $\text{CDCl}_3$ )  $\delta$  7.54-7.50 (m, 3H), 7.48-7.43 (m, 1H), 7.42-7.32 (m, 4H), 7.15 (dd,  $J$  = 5.1, 3.6 Hz, 1H), 7.05 (d,  $J$  = 16.4 Hz, 1H), 6.66 (s, 1H), 5.73 (s, 1H) ppm;  $^{13}\text{C}$  NMR (125 MHz,  $\text{CDCl}_3$ )  $\delta$  166.8, 160.7, 155.4, 136.5, 135.5, 130.0, 129.7,

129.1, 128.2, 127.6 (2C), 127.5, 111.7, 111.1 ppm; HRMS (ESI)  $m/z$  calcd for  $\text{C}_{16}\text{H}_{12}\text{N}_2\text{O}_2\text{SNa}^+[\text{M}+\text{Na}]^+$ : 319.0512 found 319.0488.

**(E)-4-(4-Oxo-4H-chromen-3-yl)-3-styrylisoxazole-5-carboxamide (4o):** White solid; mp

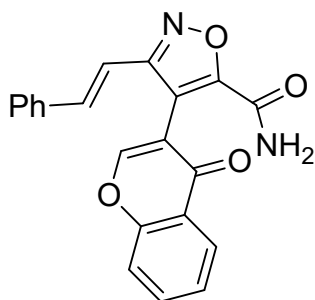

190-192 °C; yield = 74%;  $R_f$  = 0.26 (EtOAc/hexane = 30:70);  $^1\text{H}$  NMR (400 MHz, DMSO- $d_6$ )  $\delta$  8.54 (s, 1H), 8.13 (s, 1H), 8.09 (d,  $J$  = 8.0 Hz, 1H), 7.86 (t,  $J$  = 7.5 Hz, 1H), 7.78-7.66 (m, 4H), 7.60-7.45 (m, 2H), 7.42-7.32 (m, 3H), 7.21 (d,  $J$  = 16.4 Hz, 1H) ppm;  $^{13}\text{C}$  NMR (100 MHz, DMSO- $d_6$ )  $\delta$  174.8, 165.8, 160.6, 158.5, 156.0, 155.8, 135.3, 134.9, 134.4, 129.4, 128.8, 127.7, 125.7,

125.4, 123.3, 118.5, 113.8, 111.9, 107.7 ppm; HRMS (ESI)  $m/z$  calcd for  $\text{C}_{21}\text{H}_{14}\text{N}_2\text{O}_4\text{Na}^+[\text{M}+\text{Na}]^+$ : 381.0845, found 381.0824.

**(E)-4-(9-Methyl-9H-carbazol-3-yl)-3-styrylisoxazole-5-carboxamide (4p):** White solid;

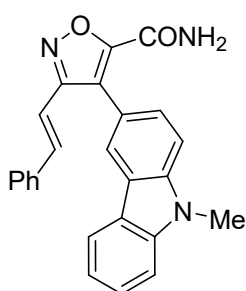

mp = 170-172 °C; yield = 76%;  $R_f$  = 0.30; (EtOAc/hexane = 30:70);  $^1\text{H}$  NMR (500 MHz,  $\text{CDCl}_3$ )  $\delta$  8.20-8.04 (m, 2H), 7.58-7.41 (m, 7H), 7.35-7.21 (m, 4H), 6.88 (d,  $J$  = 16.4 Hz, 1H), 6.65 (s, 1H), 5.72 (s, 1H), 3.90 (s, 3H) ppm;  $^{13}\text{C}$  NMR (125 MHz,  $\text{CDCl}_3$ )  $\delta$  166.4, 161.1, 155.9, 141.5, 141.0, 135.7, 135.4, 129.4, 129.0, 128.3, 127.4, 126.2, 123.1, 122.7, 122.4, 120.7, 119.3, 118.6, 118.5, 112.0, 108.8, 108.7,

29.4 ppm; HRMS (ESI)  $m/z$  calcd for  $\text{C}_{25}\text{H}_{20}\text{N}_3\text{O}_2^+[\text{M}+\text{H}]^+$ : 394.1550, found 394.1580.

**(E)-4-Isopropyl-3-styrylisoxazole-5-carboxamide (4q):** White solid; mp 135-137 °C; yield

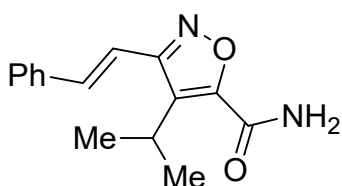

= 53%;  $R_f$  = 0.40 (EtOAc/hexane = 30:70);  $^1\text{H}$  NMR (500 MHz,  $\text{CDCl}_3$ )  $\delta$  7.54 (d,  $J$  = 7.5 Hz, 2H), 7.41-7.32 (m, 4H), 7.02 (d,  $J$  = 16.3 Hz, 1H), 6.86 (s, 1H), 6.05 (s, 1H), 3.56-3.47 (m, 1H), 1.37 (d,  $J$  = 7.1 Hz, 6H) ppm;  $^{13}\text{C}$  NMR (125 MHz,  $\text{CDCl}_3$ )  $\delta$

165.2, 162.1, 155.6, 135.8, 134.4, 129.3, 129.0, 127.2, 122.7, 112.3, 23.2, 22.5 ppm; HRMS (ESI)  $m/z$  calcd for  $C_{15}H_{16}N_2O_2Na^+$   $[M+Na]^+$ : 279.1104, found 279.1104.

**(E)-4-(6-Methylhept-5-en-2-yl)-3-styrylisoxazole-5-carboxamide (4r)**: White solid; yield =

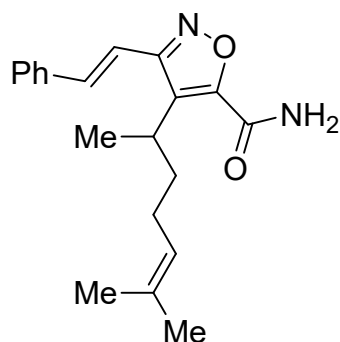

60%; mp 168-170 °C;  $R_f$  = 0.4 (EtOAc/hexane = 30:70);  $^1H$  NMR (500 MHz,  $CDCl_3$ )  $\delta$  7.53 (d,  $J$  = 7.4 Hz, 2H), 7.43-7.32 (m, 4H), 6.95 (d,  $J$  = 16.3 Hz, 1H), 6.76 (s, 1H), 5.59 (s, 1H), 5.07 (t,  $J$  = 6.0 Hz, 1H), 3.32-3.24 (m, 1H), 1.94-1.85 (m, 3H), 1.77-1.67 (m, 1H), 1.64 (s, 3H), 1.47 (s, 3H), 1.35 (d,  $J$  = 7.1 Hz, 3H) ppm;  $^{13}C$  NMR (125 MHz,  $CDCl_3$ )  $\delta$  165.8, 161.8, 156.3, 135.8, 134.3, 132.0, 129.3, 129.1, 127.2, 124.3, 121.3, 112.1,

36.1, 28.1, 26.5, 25.9, 20.8, 17.8 ppm; HRMS (ESI)  $m/z$  calcd for  $C_{20}H_{24}N_2O_2Na^+$   $[M+Na]^+$  : 347.1730, found 347.1707.

**(E)-4-(2-(Benzyloxy)ethyl)-3-styrylisoxazole-5-carboxamide (4s)**: White solid; mp 120-

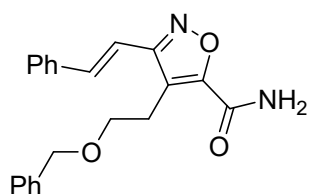

122 °C; yield = 64%;  $R_f$  = 0.34 (EtOAc/hexane = 30:70);  $^1H$  NMR (500 MHz,  $CDCl_3$ )  $\delta$  7.47 (d,  $J$  = 6.9 Hz, 2H), 7.42 (d,  $J$  = 16.5 Hz, 1H), 7.38-7.33 (m, 3H), 7.26-7.23 (m, 3H), 7.21 (d,  $J$  = 5.2 Hz, 2H), 7.01 (d,  $J$  = 16.4 Hz, 1H), 6.79 (s, 1H), 5.61 (s, 1H), 4.49 (s, 2H), 3.73 (t,  $J$  = 6.0 Hz, 2H), 3.10 (t,  $J$  = 6.0 Hz, 2H) ppm;  $^{13}C$

NMR (125 MHz,  $CDCl_3$ )  $\delta$  167.7, 161.7, 155.8, 138.4, 135.8, 134.6, 129.2, 129.0, 128.4, 127.6, 127.5, 127.4, 114.2, 112.1, 73.1, 70.0, 23.5 ppm; HRMS (ESI)  $m/z$  calcd for  $C_{21}H_{20}N_2O_3Na^+$   $[M+Na]^+$ : 371.1366, found 371.1364.

**(E)-4-(Cyclohex-3-en-1-yl)-3-styrylisoxazole-5-carboxamide (4t)**: White solid; mp 165-

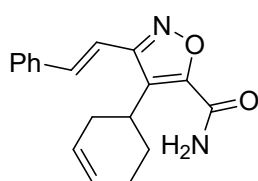

167 °C; yield = 66%;  $R_f$  = 0.36 (EtOAc/hexane = 30:70);  $^1H$  NMR (500 MHz,  $CDCl_3$ )  $\delta$  7.53 (d,  $J$  = 7.3 Hz, 2H), 7.43-7.36 (m, 3H), 7.36-7.31 (m, 1H), 7.01 (d,  $J$  = 16.3 Hz, 1H), 6.82 (s, 1H), 5.90 (s, 1H), 5.83-5.72 (m, 2H), 3.45-3.37 (m, 1H), 2.49-2.41 (m, 1H), 2.23-

2.12 (m, 4H), 1.86-1.83 (m, 1H) ppm;  $^{13}C$  NMR (125 MHz,  $CDCl_3$ )  $\delta$  165.7, 162.0, 156.1, 135.8, 134.6, 129.3, 129.0, 127.3, 127.1, 126.6, 121.3, 112.3, 31.6, 29.3, 28.2, 25.9 ppm; HRMS (ESI)  $m/z$  calcd for  $C_{18}H_{18}N_2O_2Na^+$   $[M+Na]^+$ : 317.1260, found 317.1262.

**(E)-4-Cyclohexyl-3-styrylisoxazole-5-carboxamide (4u):** White solid; mp 168-170 °C; yield = 62%;  $R_f = 0.4$  (EtOAc/hexane = 30:70);  $^1\text{H NMR}$  (500 MHz,  $\text{CDCl}_3$ )  $\delta$  7.56-7.51 (m, 2H), 7.44-7.32 (m, 4H), 7.04 (d,  $J = 16.3$  Hz, 1H), 6.77 (s, 1H), 5.72 (s, 1H), 3.19-3.07 (m, 1H), 1.89-1.70 (m, 7H), 1.48-1.28 (m, 3H) ppm;  $^{13}\text{C NMR}$  (125 MHz,  $\text{CDCl}_3$ )  $\delta$  165.4, 162.1, 156.1, 135.9, 134.4, 129.3, 129.0, 127.3, 121.9, 112.6, 33.4, 32.6, 27.0, 26.0 ppm; HRMS (ESI)  $m/z$  calcd for  $\text{C}_{18}\text{H}_{20}\text{N}_2\text{O}_2\text{Na}^+[\text{M}+\text{Na}]^+$ : 319.1417, found 319.1402.

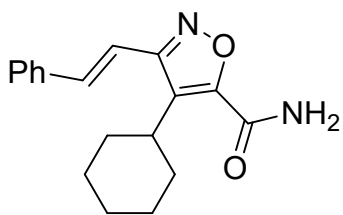

**(E)-3-(4-Methoxystyryl)-4-phenylisoxazole-5-carboxamide (4v):** White solid; yield = 80%; mp 184-185 °C;  $R_f = 0.25$  (EtOAc/hexane = 30:70);  $^1\text{H NMR}$  (500 MHz,  $\text{CDCl}_3$ )  $\delta$  7.47-7.36 (m, 8H), 6.88 (d,  $J = 8.5$  Hz, 2H), 6.70 (d,  $J = 16.5$  Hz, 1H), 6.68 (s, 1H), 5.75 (s, 1H), 3.83 (s, 3H) ppm;  $^{13}\text{C NMR}$  (125 MHz,  $\text{CDCl}_3$ )  $\delta$  166.8, 161.1, 160.8, 155.5, 135.5, 130.5, 128.9, 128.6, 128.5, 128.4, 128.3, 116.9, 114.5, 109.6, 55.5 ppm; HRMS (ESI)  $m/z$  calcd for  $\text{C}_{19}\text{H}_{16}\text{N}_2\text{O}_3\text{Na}^+[\text{M}+\text{Na}]^+$ : 343.1053, found 343.1045.

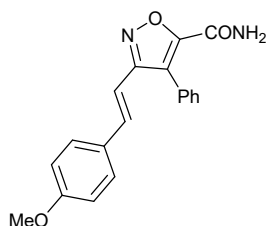

**(E)-3-(4-(tert-Butyl)styryl)-4-phenylisoxazole-5-carboxamide (4w):** White solid; yield; mp 145-146 °C; yield = 82%;  $R_f = 0.27$  (EtOAc/hexane = 30:70);  $^1\text{H NMR}$  (500 MHz,  $\text{CDCl}_3$ )  $\delta$  7.49-7.37 (m, 10H), 6.80 (d,  $J = 16.4$  Hz, 1H), 6.67 (s, 1H), 5.67 (s, 1H), 1.32 (s, 9H) ppm;  $^{13}\text{C NMR}$  (125 MHz,  $\text{CDCl}_3$ )  $\delta$  166.7, 160.9, 155.5, 153.1, 135.8, 132.8, 130.5, 128.54, 128.50, 128.48, 127.3, 126.0, 117.4, 110.9, 35.0, 31.3 ppm; HRMS (ESI)  $m/z$  calcd for  $\text{C}_{22}\text{H}_{22}\text{N}_2\text{O}_2\text{Na}^+[\text{M}+\text{Na}]^+$ : 369.1573, found 369.1550.

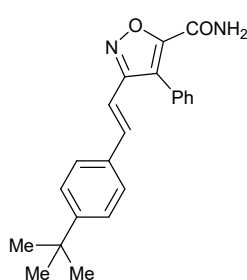

**(E)-3-(4-Chlorostyryl)-4-phenylisoxazole-5-carboxamide (4x):** White solid; yield = 78%; mp 180-182 °C;  $R_f = 0.30$  (EtOAc/hexane = 30:70);  $^1\text{H NMR}$  (500 MHz,  $\text{CDCl}_3$ )  $\delta$  7.48-7.29 (m, 10H), 6.80 (d,  $J = 16.4$  Hz, 1H), 6.67 (s, 1H), 5.67 (s, 1H) ppm;  $^{13}\text{C NMR}$  (125 MHz,  $\text{CDCl}_3$ )  $\delta$  166.1, 160.78, 155.6, 135.3, 134.5, 134.0, 130.5, 129.3, 128.7, 128.61, 128.59, 128.3, 118.1, 112.9 ppm; HRMS (ESI)  $m/z$  calcd for  $\text{C}_{18}\text{H}_{12}\text{ClN}_2\text{O}_2\text{Na}^+[\text{M}+\text{Na}]^+$ : 347.0558, found 347.0567.

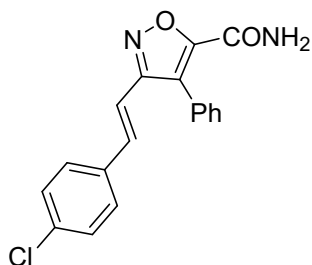

Compound **5aa**: White solid; mp = 153-155 °C; yield = 90%; dr = 99:1;  $R_f$  = 0.30

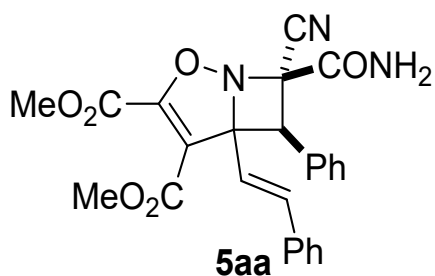

(EtOAc/hexane = 30/70);  $^1\text{H}$  NMR (500 MHz,  $\text{CDCl}_3$ )  $\delta$  7.37–7.08 (m, 8H), 7.21 (d,  $J$  = 7.05 Hz, 2H), 7.18 (s, 1H), 6.76 (d,  $J$  = 16.3 Hz, 1H), 6.10 (s, 1H), 5.97 (d,  $J$  = 16.3 Hz, 1H), 4.92 (s, 1H), 3.99 (s, 3H), 3.82 (s, 3H) ppm;  $^{13}\text{C}$  NMR (125 MHz,  $\text{CDCl}_3$ )  $\delta$  163.7, 161.1, 158.0, 151.5, 135.5, 133.5, 130.9, 130.4, 129.3,

128.8(2C), 128.7, 126.9, 124.5, 115.4, 114.4, 81.6, 70.9, 58.4, 53.9, 52.8 ppm; HRMS (ESI)  $m/z$  calcd for  $\text{C}_{25}\text{H}_{21}\text{N}_3\text{O}_6\text{Na}^+$   $[\text{M}+\text{Na}]^+$ : 482.1323, found 482.1329.

**Hydrogenation reaction of 4a:** To a stirred solution of compound **4a** (0.1 mmol) in dry THF (5.0 mL) was added Pd/C(10 mg), followed by degassing three times. Afterwards, the reaction mixture was hydrogenated at 10 °C under an  $\text{H}_2$ -balloon for 3h. After completion of the reaction, the reaction mixture was passed through a short plug silica-gel and washed with ethyl acetate. Next, the solvent was evaporated under reduced pressure to give the crude product, which was purified by column chromatography over silica-gel to deliver the **6aa**.

**3-Phenethyl-4-phenylisoxazole-5-carboxamide (6aa):** Colorless solid; yield = 86% (25.1 mg); mp = 80-81 °C;  $R_f$  = 0.35 (EtOAc/hexane = 30:70);  $^1\text{H}$  NMR (500 MHz,  $\text{CDCl}_3$ )  $\delta$  7.36-7.31 (m, 3H), 7.27-7.17 (m, 3H), 7.12-7.03 (m, 4H), 6.61 (s, 1H), 5.98 (s, 1H), 3.07-2.97 (m, 4H) ppm;  $^{13}\text{C}$  NMR (125 MHz,  $\text{CDCl}_3$ )  $\delta$  170.8, 161.2, 155.2, 139.8, 130.0, 128.7, 128.5, 128.43, 128.36, 128.2, 126.7, 117.6, 33.7, 27.7 ppm; HRMS (ESI)  $m/z$  calcd for  $\text{C}_{18}\text{H}_{16}\text{N}_2\text{O}_2\text{Na}^+$   $[\text{M}+\text{Na}]^+$ : 315.1104, found 315.1085.

**Synthesis of 3-(1-hydroxy-3-oxobutyl)-4-phenylisoxazole-5-carboxamide (7aa):** To a stirred solution of compound **4a** (0.1 mmol) in acetone/ $\text{H}_2\text{O}$  (5.0 mL, 9:1) was added  $\text{KMnO}_4$  (2.0 equiv) at room temperature for 4h. After completion of the reaction, the reaction mixture was quenched with AcOH (0.15 mL), followed by evaporation of the solvent under reduced pressure to provide crude mass. Then, it was directly purified by column chromatography over silica-gel to give **7aa** in 51% yield.

**3-(1-Hydroxy-3-oxobutyl)-4-phenylisoxazole-5-carboxamide (7aa):** Colorless solid; yield = 51% (14.0 mg); mp = 78-80 °C;  $R_f$  = 0.28 (EtOAc/hexane = 50:50);  $^1\text{H}$  NMR (400 MHz, DMSO)  $\delta$  8.26 (s, 1H), 7.86 (s, 1H), 7.42 (br s, 5H), 5.98 (d,  $J$  = 5.1 Hz, 1H), 5.08-5.0 (m, 1H), 3.11 (dd,  $J$  = 16.8, 7.8 Hz, 1H), 2.96 (dd,  $J$  = 16.9, 5.1 Hz, 1H), 2.08 (s, 3H) ppm;  $^{13}\text{C}$  NMR (125 MHz, DMSO)  $\delta$  205.6, 169.6, 161.3, 157.4, 129.5, 128.41, 128.35, 127.9, 115.4,

59.6, 47.8, 30.3 ppm; HRMS (ESI)  $m/z$  calcd for  $C_{14}H_{14}N_2O_4Na^+$   $[M+Na]^+$  : 297.0846, found 297.0828.

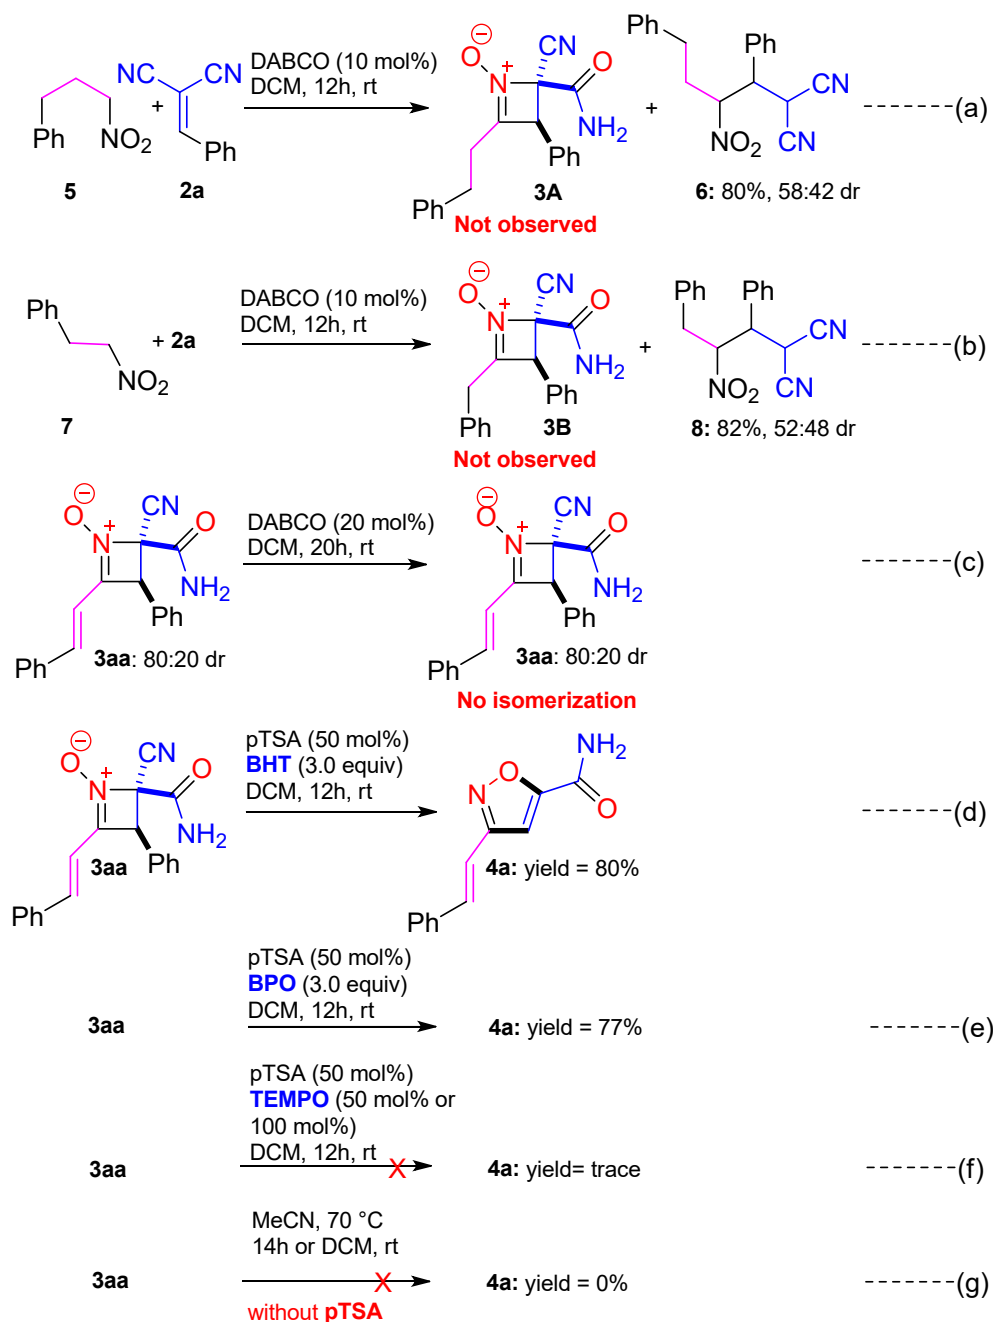

### Scheme S1. Control experiment

**Synthesis of compound 6 (Scheme S1a):** To a stirred solution of 3-nitropropyl benzene (**5**; 0.2 mmol) and compound **2a** (0.24 mmol) in dry DCM (1.0 mL) at room temperature was added DABCO (0.02 mmol) under an argon atmosphere for 12 h. After completion of the reaction, the reaction mixture was purified by column chromatography to give the pure



Michael adduct **6**. The product was characterized by its spectroscopic data ( $^1\text{H}$ ,  $^{13}\text{C}$  NMR and HRMS).

**2-(2-Nitro-1,4-diphenylbutyl)malononitrile (6):** Gummy liquid; yield = 80%;  $R_f$  = 0.60

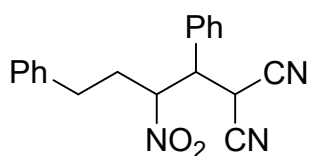

(EtOAc/hexane = 10:90); dr = 58:42;  $^1\text{H}$  NMR (400 MHz,  $\text{CDCl}_3$ )  $\delta$ (**major isomer**) 7.48-7.38 (m, 3H), 7.29-7.19 (m, 5H), 6.97 (d,  $J$  = 6.9 Hz, 2H), 5.17-5.05 (m, 1H), 4.02 (d,  $J$  = 4.3 Hz, 1H), 3.78-3.70 (m, 1H), 2.73-2.60 (m, 1H), 2.54-2.42 (m, 1H), 2.24-2.07 (m, 1H), 1.92-1.80 (m, 1H) ppm;  $^{13}\text{C}$  NMR (100 MHz,  $\text{CDCl}_3$ )  $\delta$ (**major isomer**) 138.5, 131.3, 130.5, 130.1, 128.9, 128.6, 128.5, 127.0, 110.5, 110.1, 87.7, 48.6, 33.9, 31.5, 27.7 ppm.

**Minor isomer:**  $R_f$  = 0.58 (EtOAc/hexane = 10:90);  $^1\text{H}$  NMR (500 MHz,  $\text{CDCl}_3$ )  $\delta$  7.47-7.39 (m, 3H), 7.35 (t,  $J$  = 7.4 Hz, 2H), 7.30-7.26 (m, 1H), 7.21-7.14 (m, 4H), 5.11-5.04 (m, 1H), 4.38 (d,  $J$  = 8.1 Hz, 1H), 3.69 (t,  $J$  = 7.4 Hz, 1H), 2.82-2.73 (m, 1H), 2.73-2.65 (m, 1H), 2.42-2.31 (m, 1H), 2.15-2.04 (m, 1H) ppm;  $^{13}\text{C}$  NMR (100 MHz,  $\text{CDCl}_3$ )  $\delta$  138.7, 131.3, 130.6, 129.9, 129.1, 128.5, 128.0, 127.2, 111.0, 110.8, 87.0, 49.3, 33.2, 32.0, 26.9 ppm; HRMS (ESI)  $m/z$  calcd for  $\text{C}_{19}\text{H}_{17}\text{N}_3\text{O}_2\text{Na}^+$  [ $\text{M}+\text{Na}$ ] $^+$ : 342.1213, found 342.1235.

**Synthesis of compound 8 (Scheme S1b):** The above procedure has been followed for the synthesis of Michael adduct **8** from 2-nitroethyl benzene (**7**) and **2a**.

**2-(2-Nitro-1,3-diphenylpropyl)malononitrile (8):** yield = 82%;  $R_f$  = 0.62; (EtOAc/hexane =

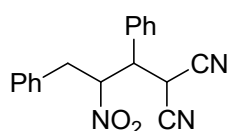

10:90); dr = 52:48;  $^1\text{H}$  NMR (500 MHz,  $\text{CDCl}_3$ )  $\delta$  (**major isomer**) 7.60-7.52 (m, 3H), 7.51-7.46 (m, 2H), 7.32-7.26 (m, 3H), 7.0-6.95 (m, 2H), 5.38-5.30 (m, 1H), 4.07 (t,  $J$  = 3.9 Hz, 1H), 3.82-3.76 (m, 1H), 3.13-2.91 (m, 2H) ppm;  $^{13}\text{C}$  NMR (125 MHz,  $\text{CDCl}_3$ )  $\delta$  (**major isomer**) 133.7, 131.4, 130.7, 130.3, 129.4, 128.8, 128.7, 128.3, 110.4, 110.2, 90.1, 48.6, 38.4, 27.8 ppm.

**Minor isomer:**  $R_f$  = 0.60; (EtOAc/hexane = 10/90);  $^1\text{H}$  NMR (500 MHz,  $\text{CDCl}_3$ )  $\delta$  7.49-7.43 (m, 3H), 7.42-7.32 (m, 3H), 7.24-7.18 (m, 4H), 5.39-5.33 (m, 1H), 4.52 (d,  $J$  = 9.0 Hz, 1H), 3.70 (dd,  $J$  = 9.0, 5.7 Hz, 1H), 3.36 (dd,  $J$  = 14.5, 8.2 Hz, 1H), 3.10 (dd,  $J$  = 14.5, 6.7 Hz, 1H) ppm;  $^{13}\text{C}$  NMR (125 MHz,  $\text{CDCl}_3$ )  $\delta$  133.7, 131.0, 130.7, 130.0, 129.6, 129.0, 128.4, 128.2, 111.2, 111.0, 88.0, 48.5, 37.0, 27.2 ppm; HRMS (ESI)  $m/z$  calcd for  $\text{C}_{18}\text{H}_{15}\text{N}_3\text{O}_2\text{Na}^+$  [ $\text{M}+\text{Na}$ ] $^+$ : 328.1056, found 328.1030.

**Isomerization reaction (Scheme S1c).** A mixture of compound **3aa** (0.1 mmol, dr = 80:20) and DABCO (20 mol%) in DCM (0.5 mL) was stirred at room temperature for 20h. After

usual workup, we have taken  $^1\text{H}$  NMR of the isolated crude product. The data indicated that no isomerization took place.

**BHT and BPO mediated reactions (Schemes S1d and 1e):** To a stirred solution of **3aa** (0.1 mmol) and pTSA (50 mol%) in dry DCM (2.0 mL) under an argon atmosphere was added BHT or BPO (0.3 mmol, 3.0 equiv) at room temperature for 12h. After usual work-up, the reaction mixture was purified by column chromatography to afford a pure product **4a** in 80% yield (BHT) and 77% yield (BPO).

**TEMPO mediated reaction (Scheme S1f).** To a stirred solution of **3aa** (0.1 mmol) and pTSA (50 mol%) in dry DCM (2.0 mL) under an argon atmosphere was added TEMPO (50 mol%) at room temperature for 12h. The TLC and  $^1\text{H}$  NMR of crude mixture showed that a trace amount of desired product **4a** was formed.

#### References:

1. (a) C. Zheng, S. Huang, Y. Liu, C. Jiang, W. Zhang, G. Fang and J. Hong, *Org. Lett.*, 2020, **22**, 4868. (b) R. Pedrosa, C. Andrés and J. M. Iglesias, *J. Org. Chem.*, 2001, **66**, 243.
2. (a) G. Bertuzzi, M. K. Thøgersen, M. Giardinetti, A. Vidal-Albalat, A. Simon, K. N. Houk and K. A. Joergensen, *J. Am. Chem. Soc.*, 2019, **141**, 3288. (b) A. A. Mousawi, P. Garra, F. Dumur, T. T. Bui, F. Goubard, J. Toufaily, T. Hamieh, B. Graff, D. Gigmes, J. P. Fouassier and J. Lalevée, *Molecules*, 2017, **22**, 2143. (c) K.-D. Warzecha, J. Leitich and M. Demuth, *J. Photochem. Photobiol. A*, 2002, **152**, 103. (d) R.V. Hangarge, S.A. Sonwane, D.A. Jarikote and M. S. Shingare, *Green Chemistry*, 2001, **3**, 310. (e) N. Salaverri, B. Carli, Gratal, B. Patrici, L. Marzo and J. Aleman, *Adv. Synth. Catal.*, 2022, **364**, 1689. (f) M.B. Plutschack, P. H. Seeberger and K. Gilmore, *Org. Lett.*, 2017, **19**, 30. D. Zhang, M. Lian, J. Liu, S. Tang, G. Liu, C. Ma, Q. Meng, H. Peng and D. Zhu, *Org. Lett.*, 2019, **21**, 2597.

SS-SSR-II-T3-E

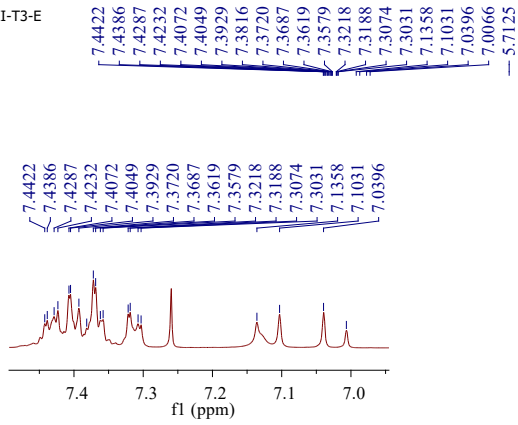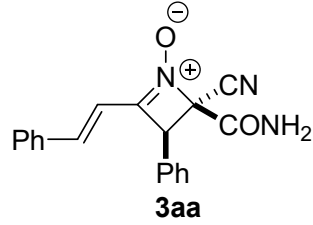

<sup>1</sup>H NMR (500 MHz CDCl<sub>3</sub>)

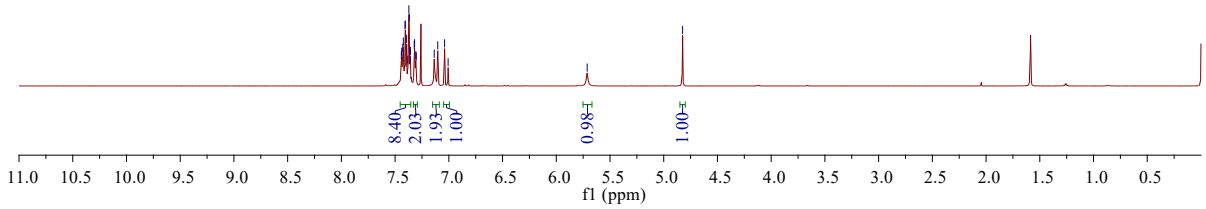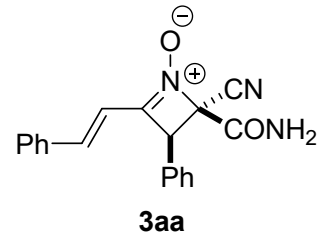

<sup>13</sup>C NMR (125 MHz CDCl<sub>3</sub>)

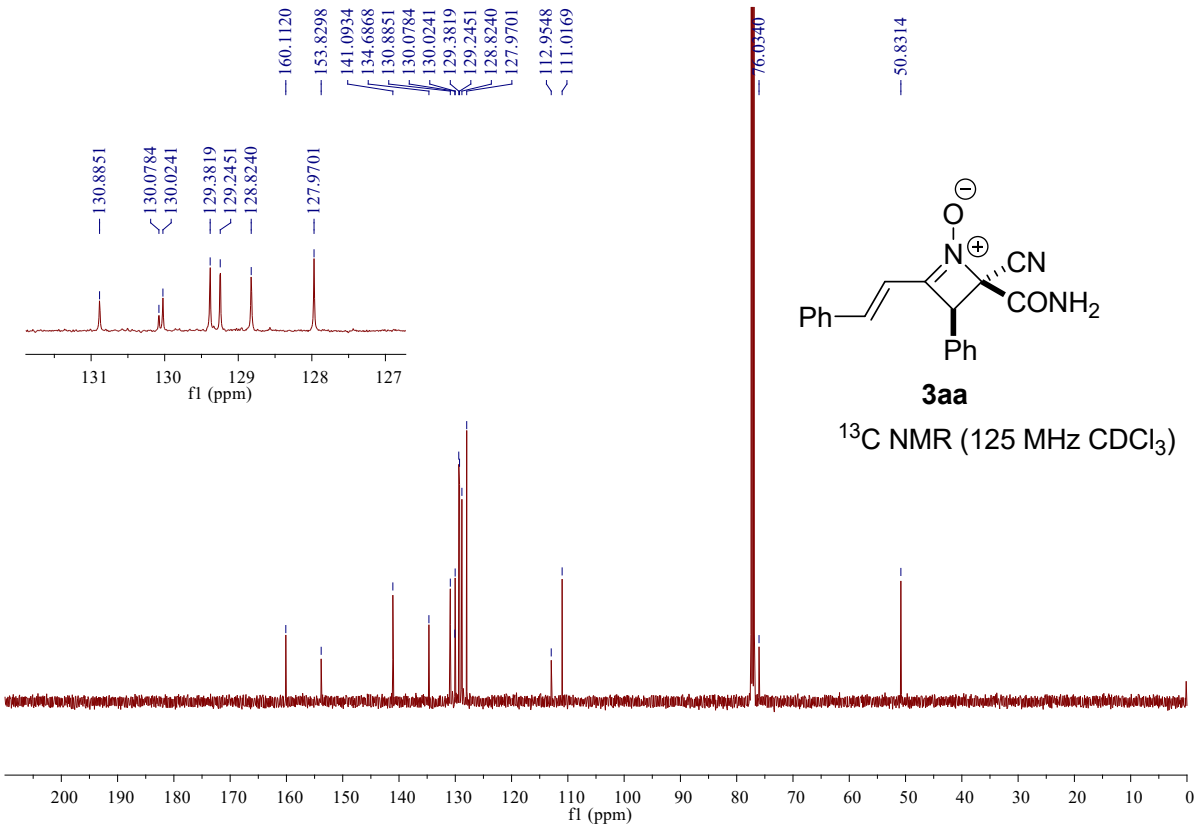

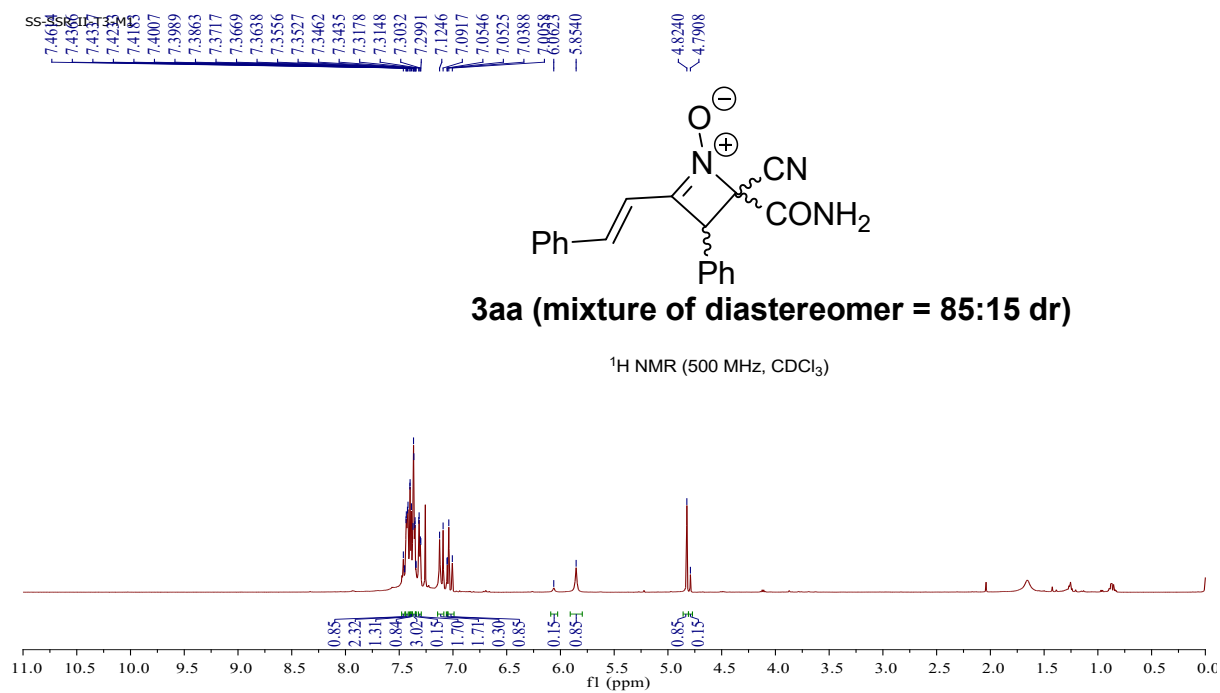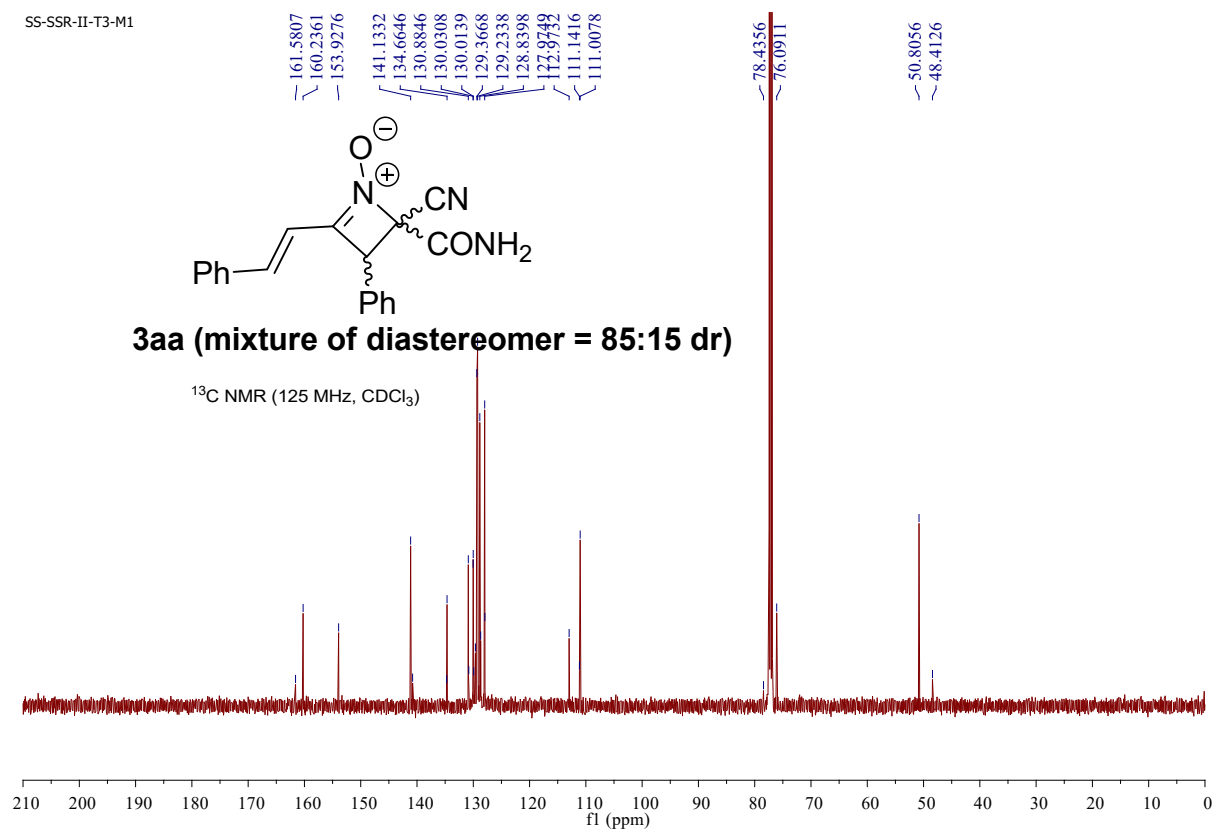

<sup>1</sup>H NMR (500 MHz, CDCl<sub>3</sub>)

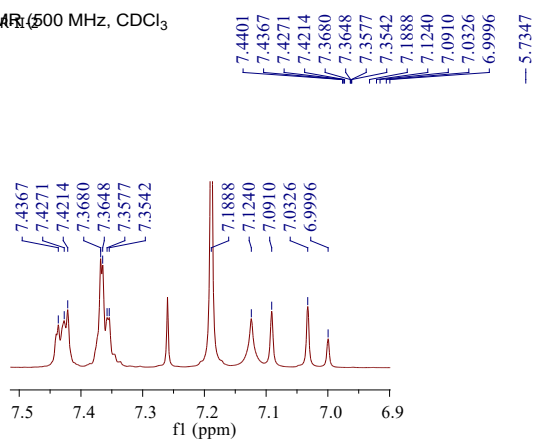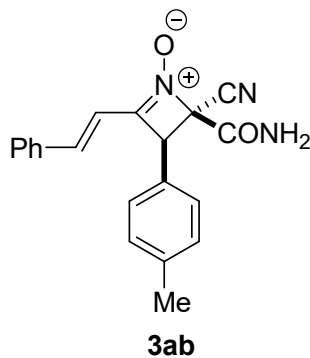

<sup>13</sup>C NMR (125 MHz, CDCl<sub>3</sub>)

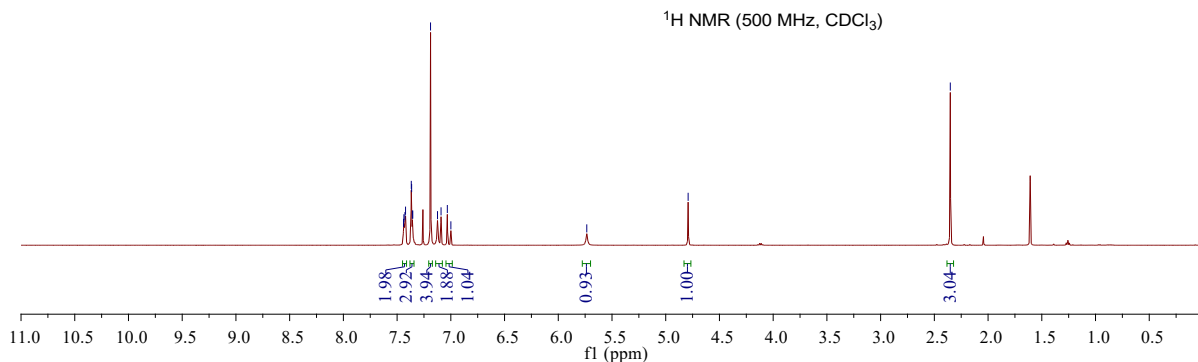

<sup>1</sup>H NMR (500 MHz, CDCl<sub>3</sub>)

SS-SSR-II-2A

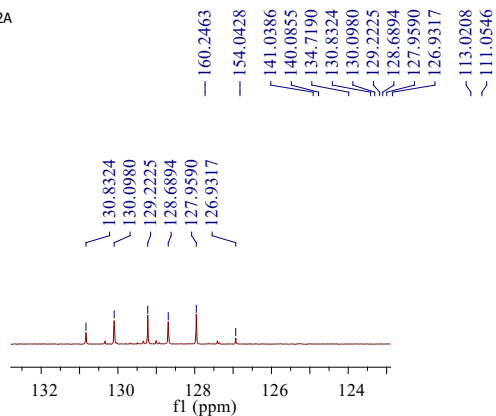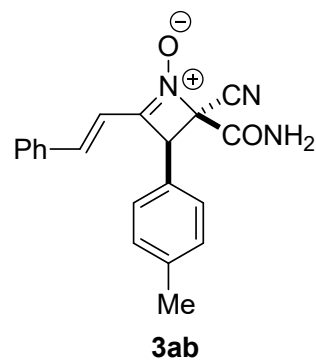

<sup>13</sup>C NMR (125 MHz, CDCl<sub>3</sub>)

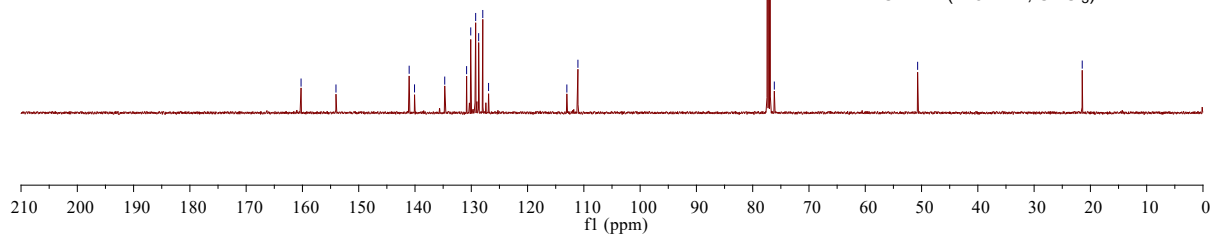

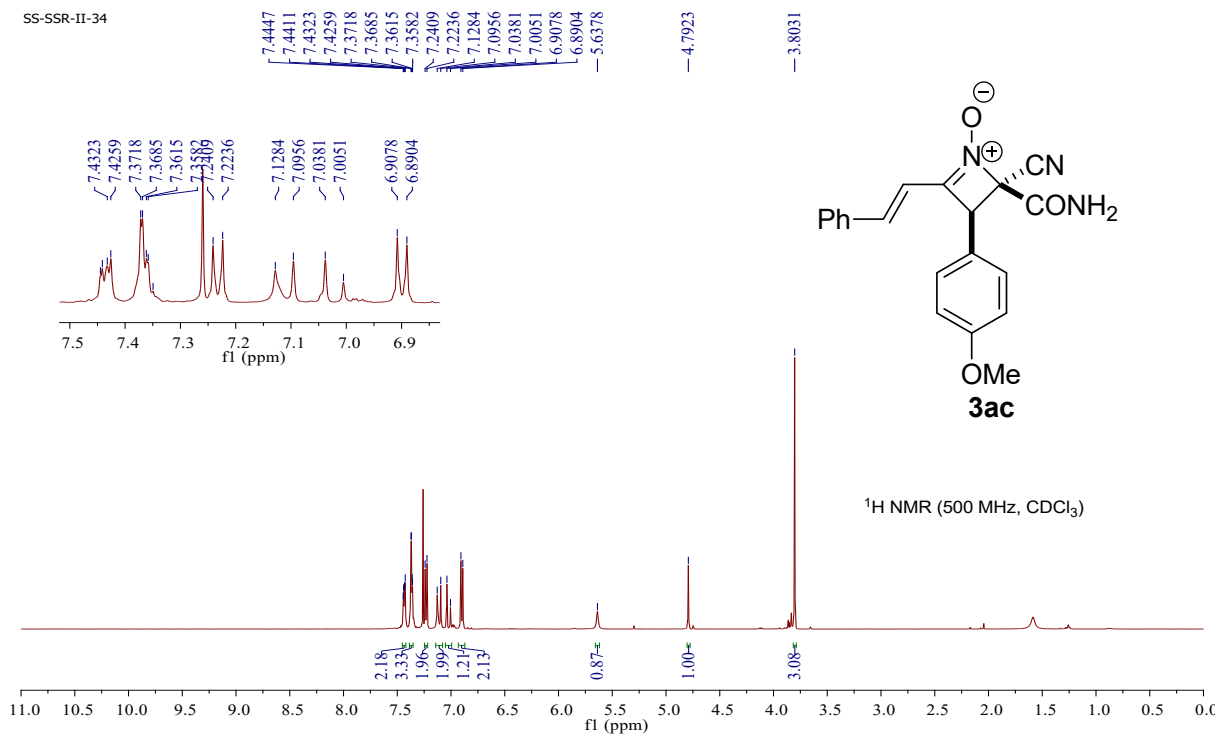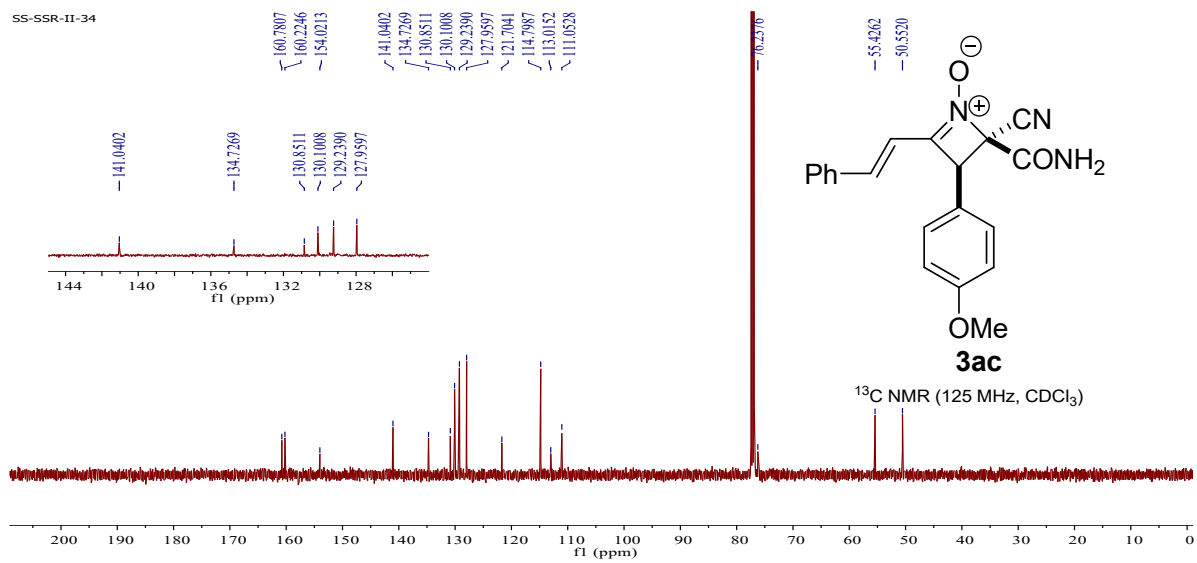

SS-SSR-II-M34

PROTONRO CDCI3 {H:\OneDrive - IIT Indore\Sampak} NMR-400 20

7.4345  
7.3742  
7.2680  
7.2486  
7.2283  
7.1276  
7.0822  
7.0496  
7.0094  
6.9907  
6.9705  
6.9116  
6.8914  
6.1403  
5.9089  
4.8009  
4.7478  
3.8352  
3.8035

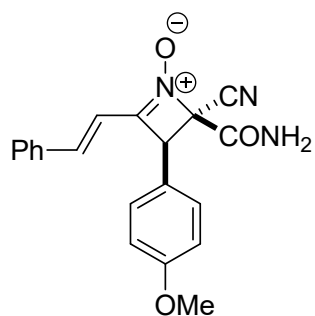

**3c (mixture of diastereomer = 82:18 dr)**

<sup>1</sup>H NMR (500 MHz, CDCl<sub>3</sub>)

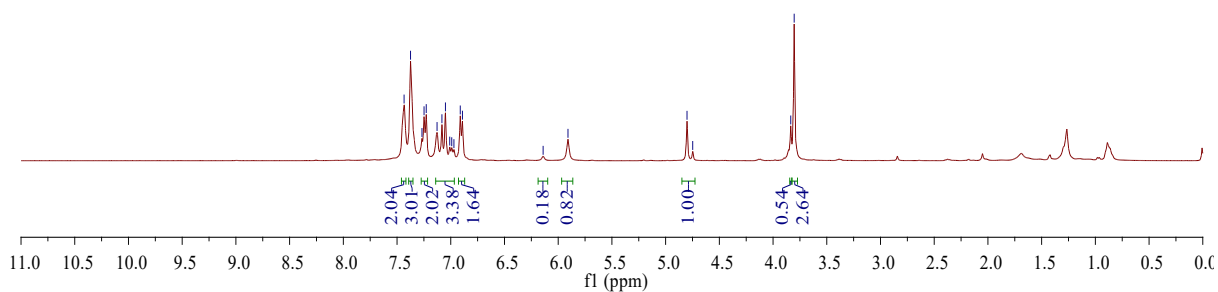

SS-SSR-II-25B

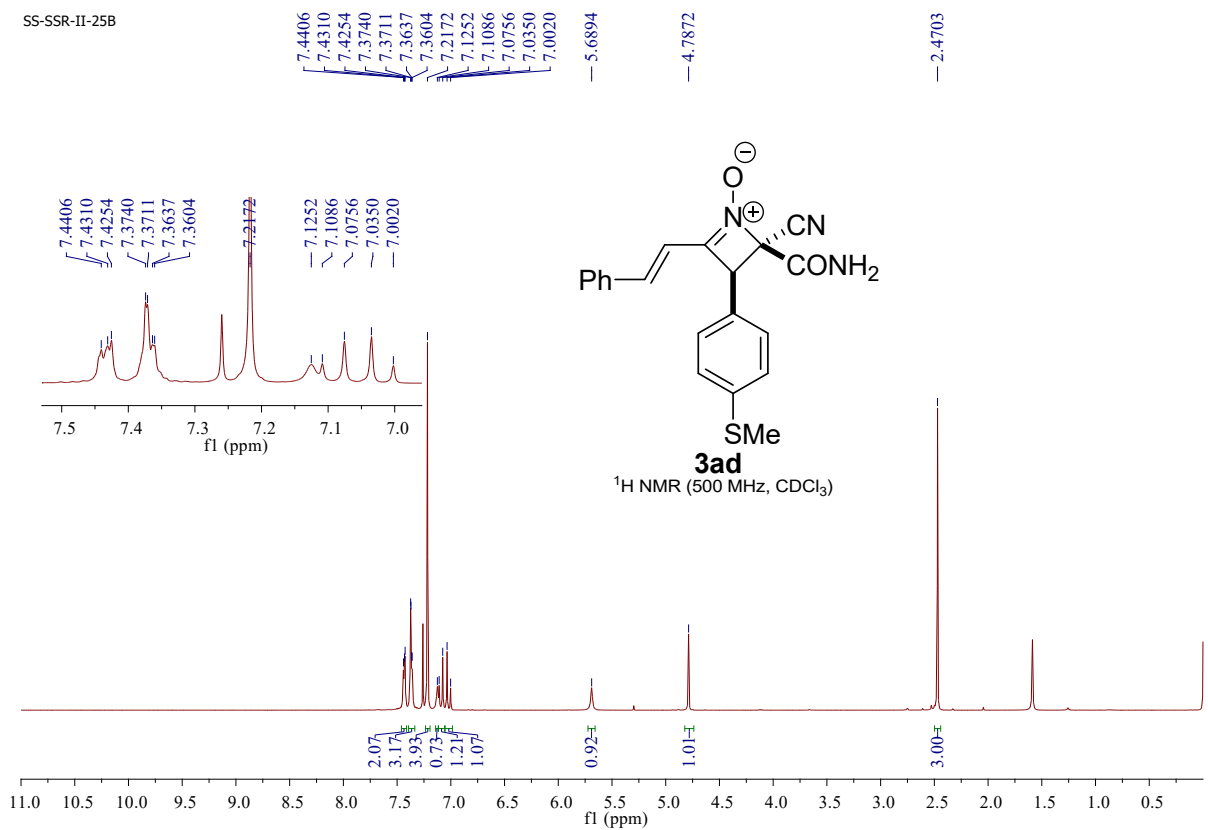

SS-SSR-II-25B

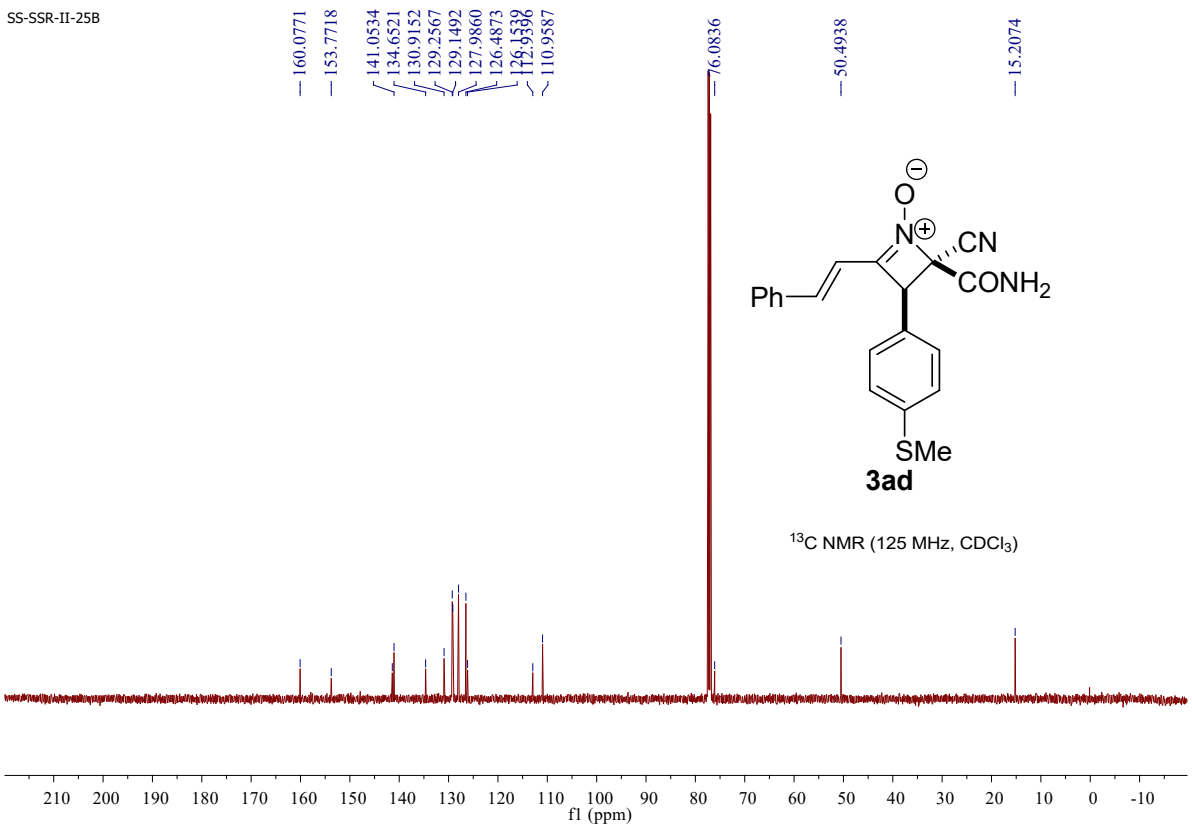



SS-SSR-II-88

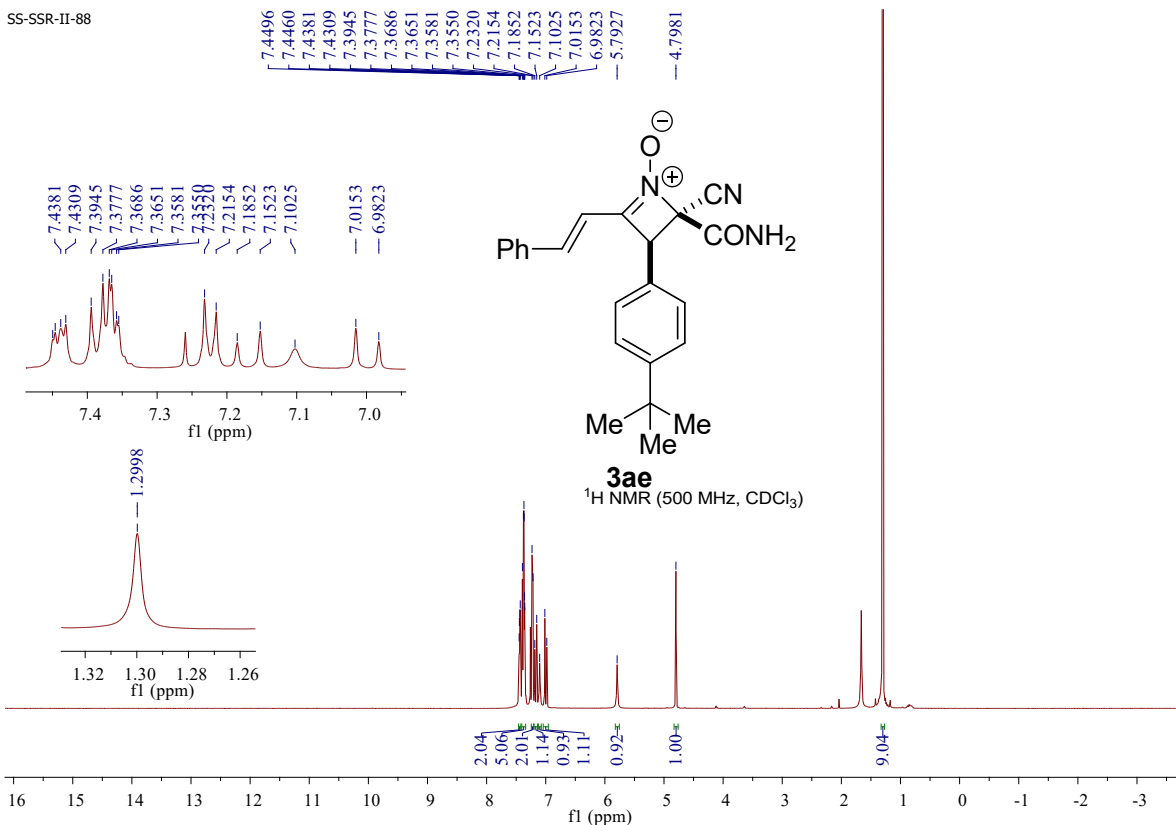

1

SS-SSR-II-88

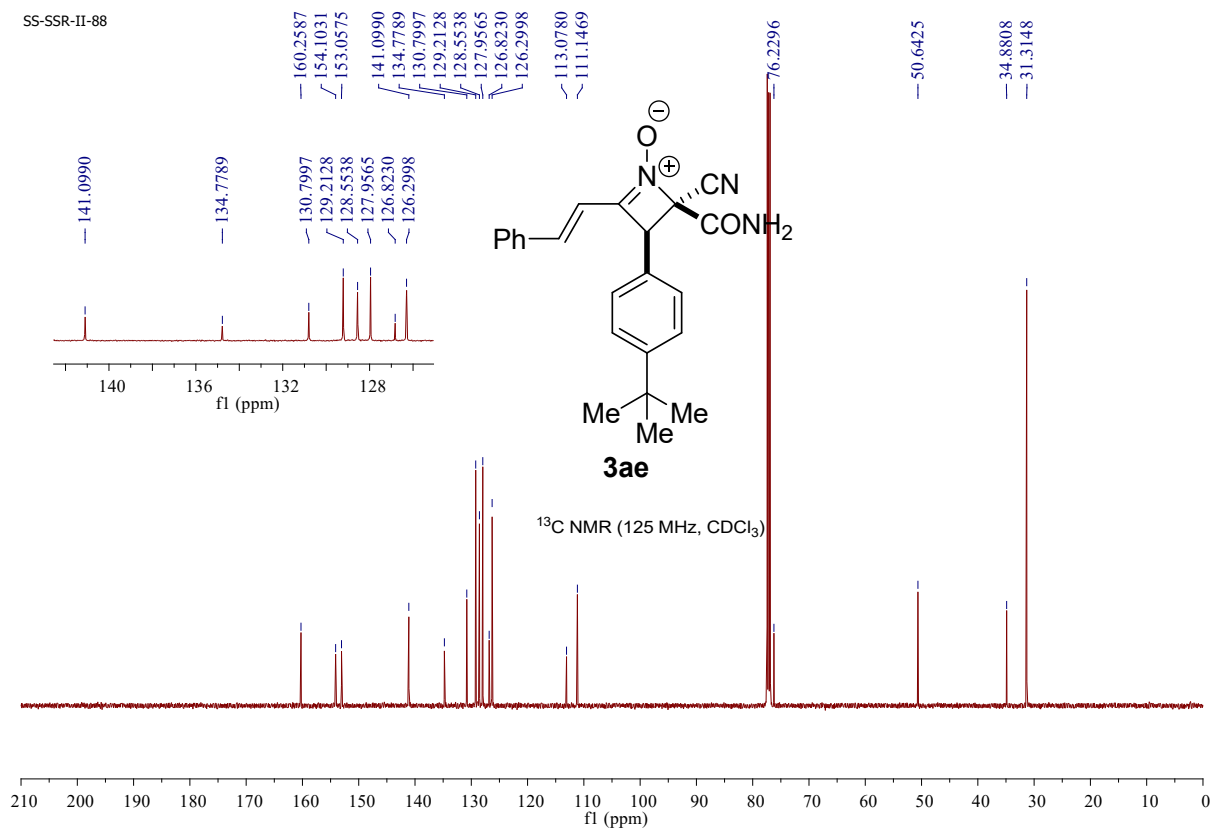

SS-SSR-II-21A

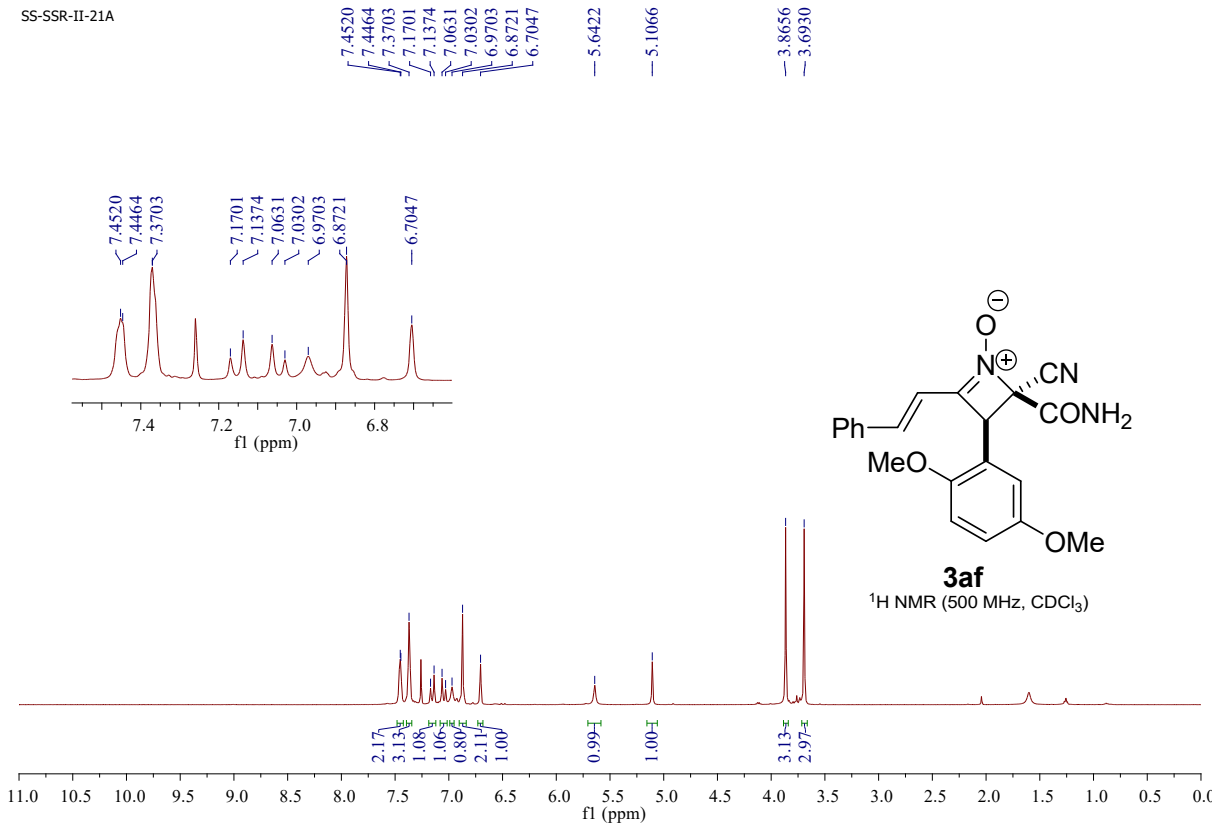

SS-SSR-II-21

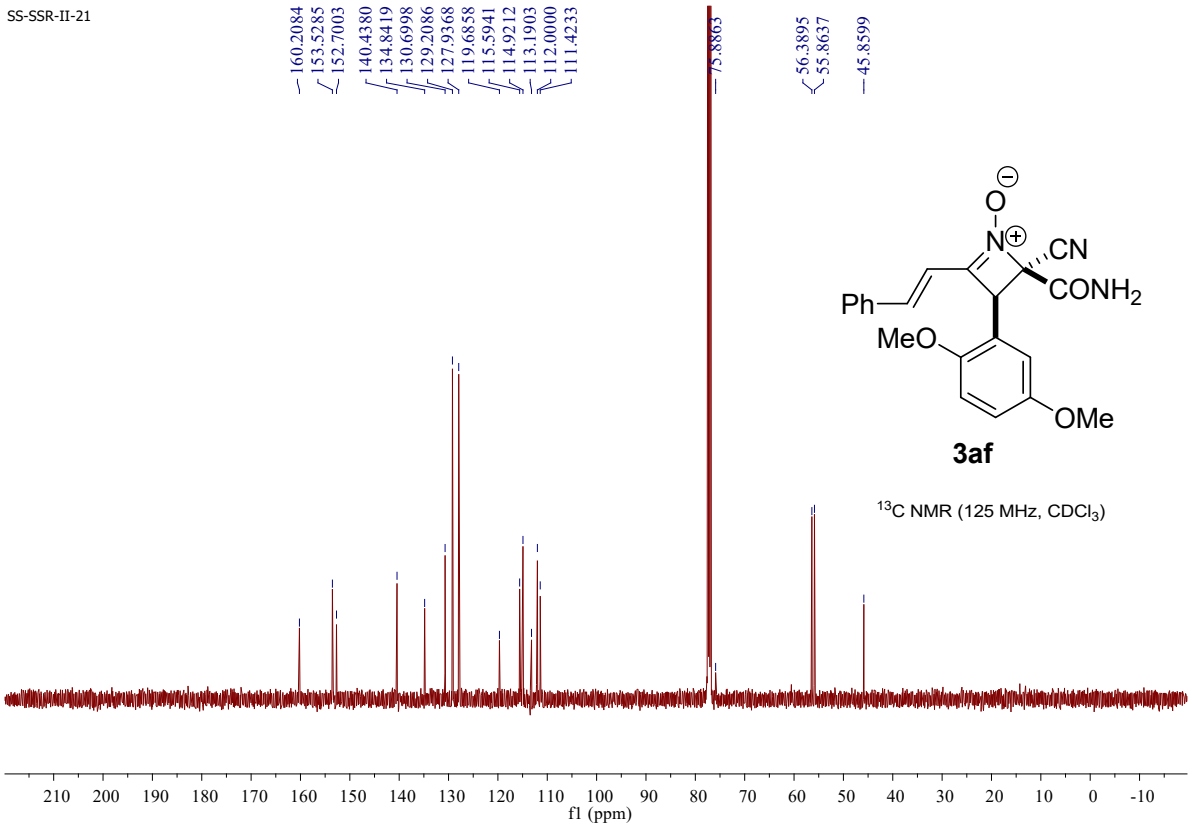

SS-SSR-II-107C

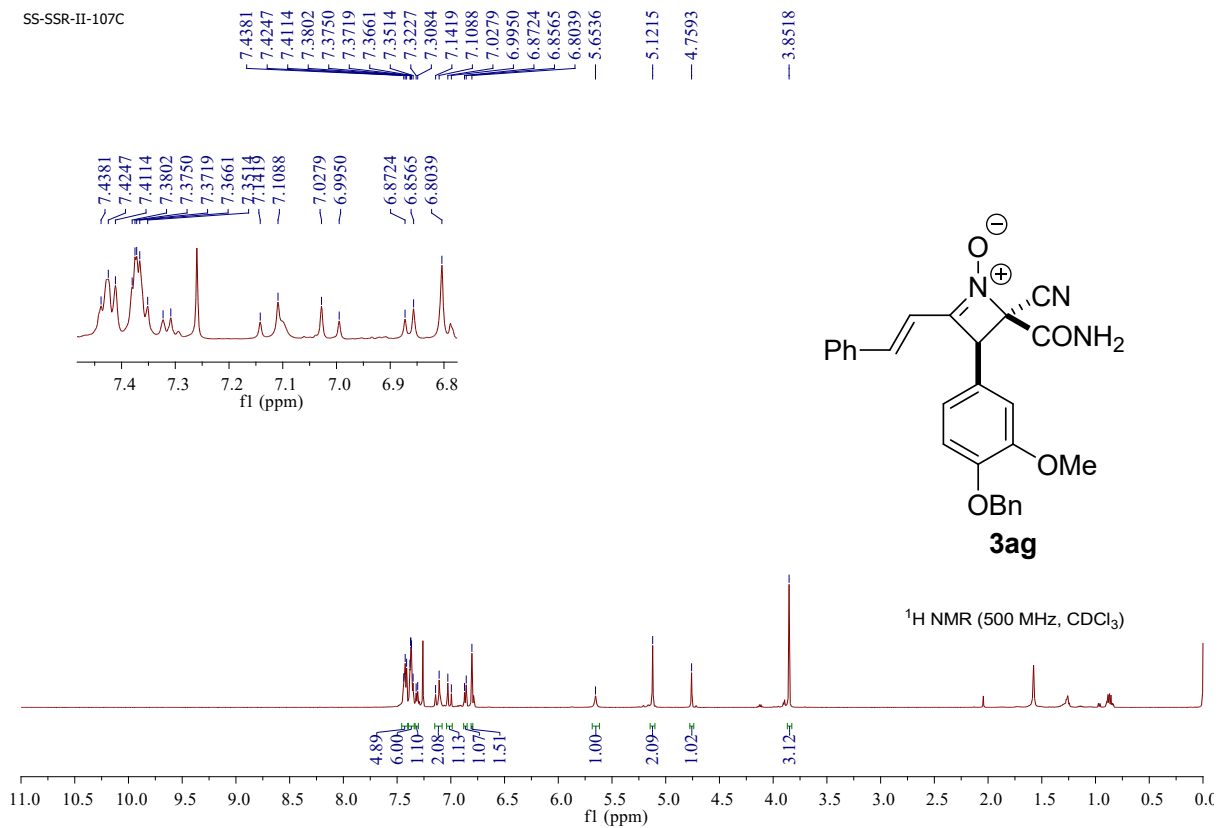

SS-SSR-II-107C

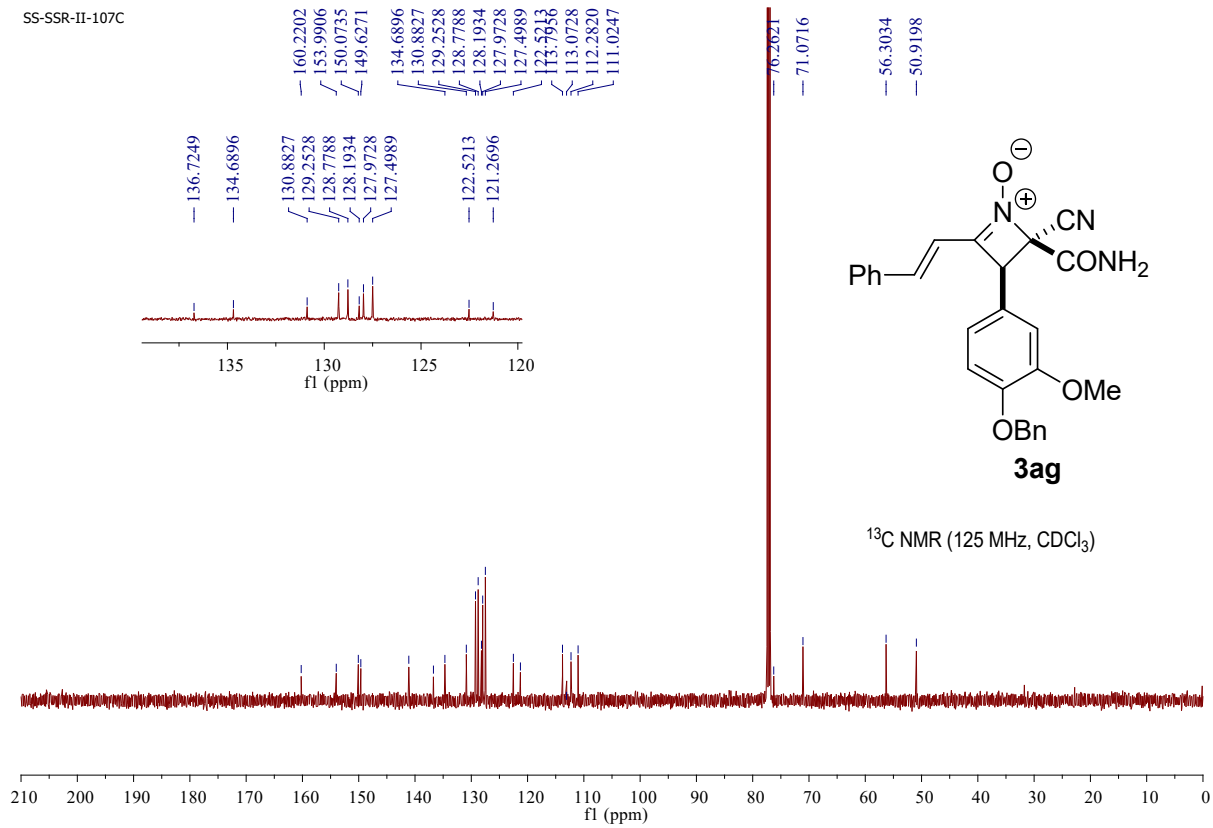

SS-SSR-11-8

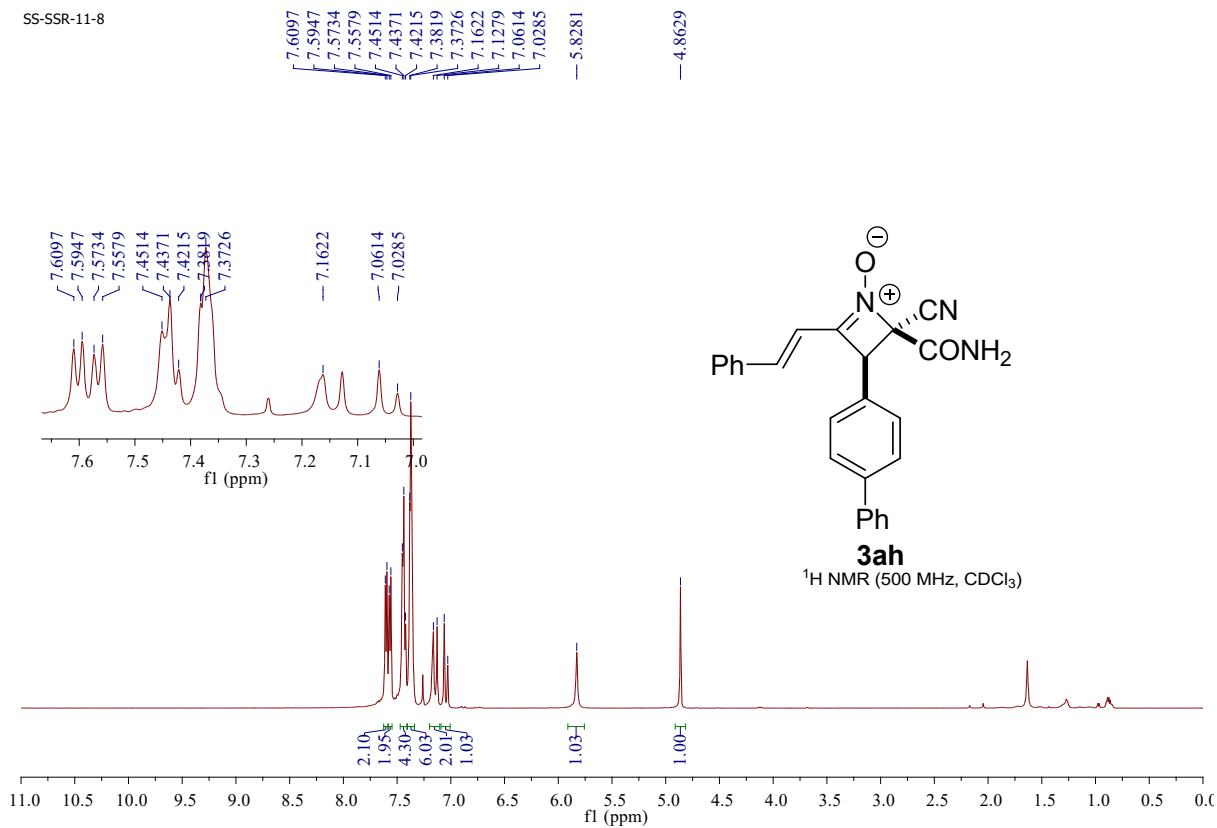

SS-SSR-11-8

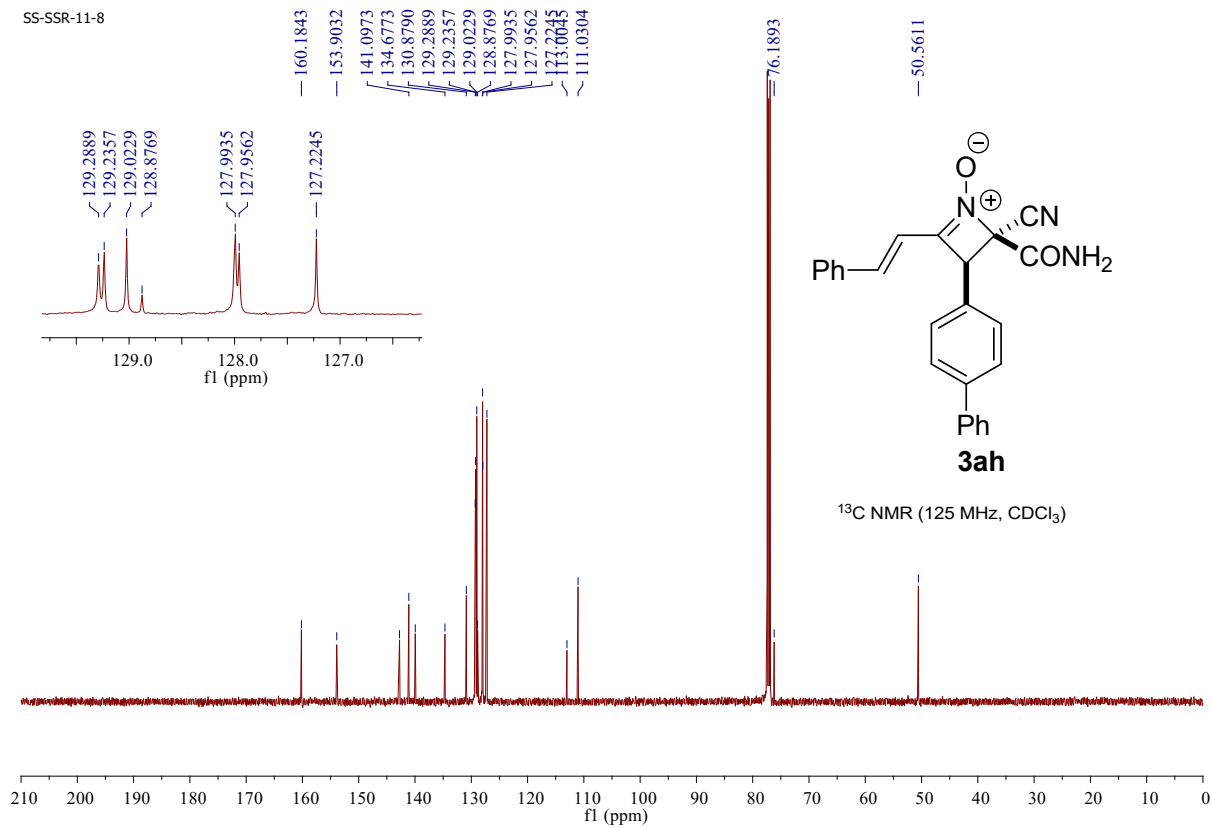

SS-SSR-II-189

PROTONRO CDCl<sub>3</sub> {H:\OneDrive - IIT Indore\Sampak} NMR-400 43

7.5531  
7.5335  
7.4312  
7.3768  
7.3533  
7.3121  
7.2932  
7.2604  
7.1524  
7.1130  
7.0721  
7.0532  
7.0107  
5.8014

4.8384

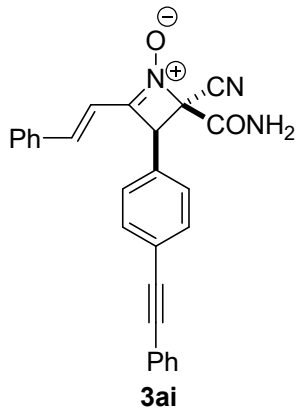

<sup>1</sup>H NMR (400 MHz, CDCl<sub>3</sub>)

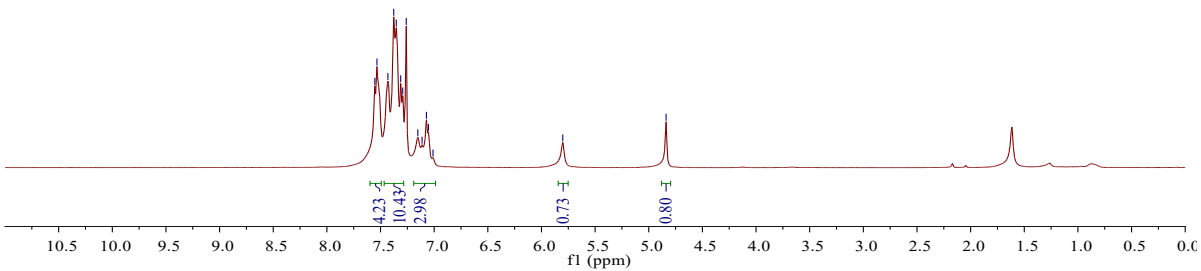

SS-SSR-II-189

C13CPD CDCl<sub>3</sub> {H:\OneDrive - IIT Indore\Sampak}

139.9747  
136.6267  
135.1275  
134.5941  
133.4647  
133.8084  
130.9614  
129.2632  
128.8784  
128.7754  
128.5327  
128.8163  
110.8985

91.3600  
88.4711

76.0721

50.4939

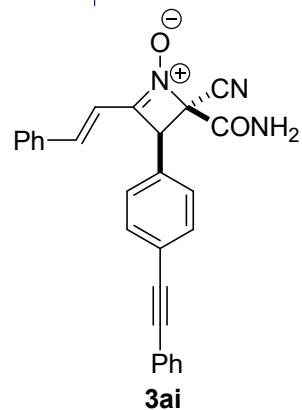

<sup>13</sup>C NMR (100 MHz, CDCl<sub>3</sub>)

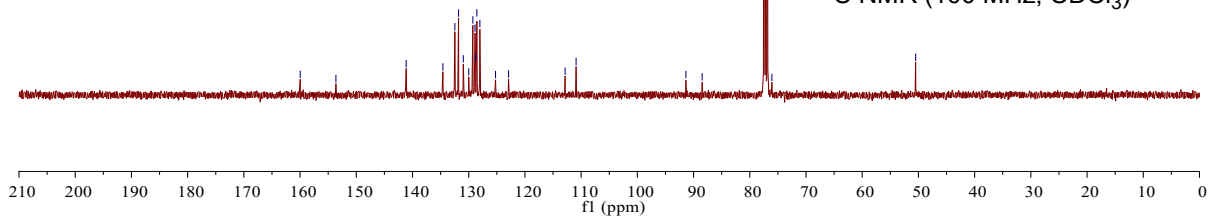

SS-SSR-II-49C

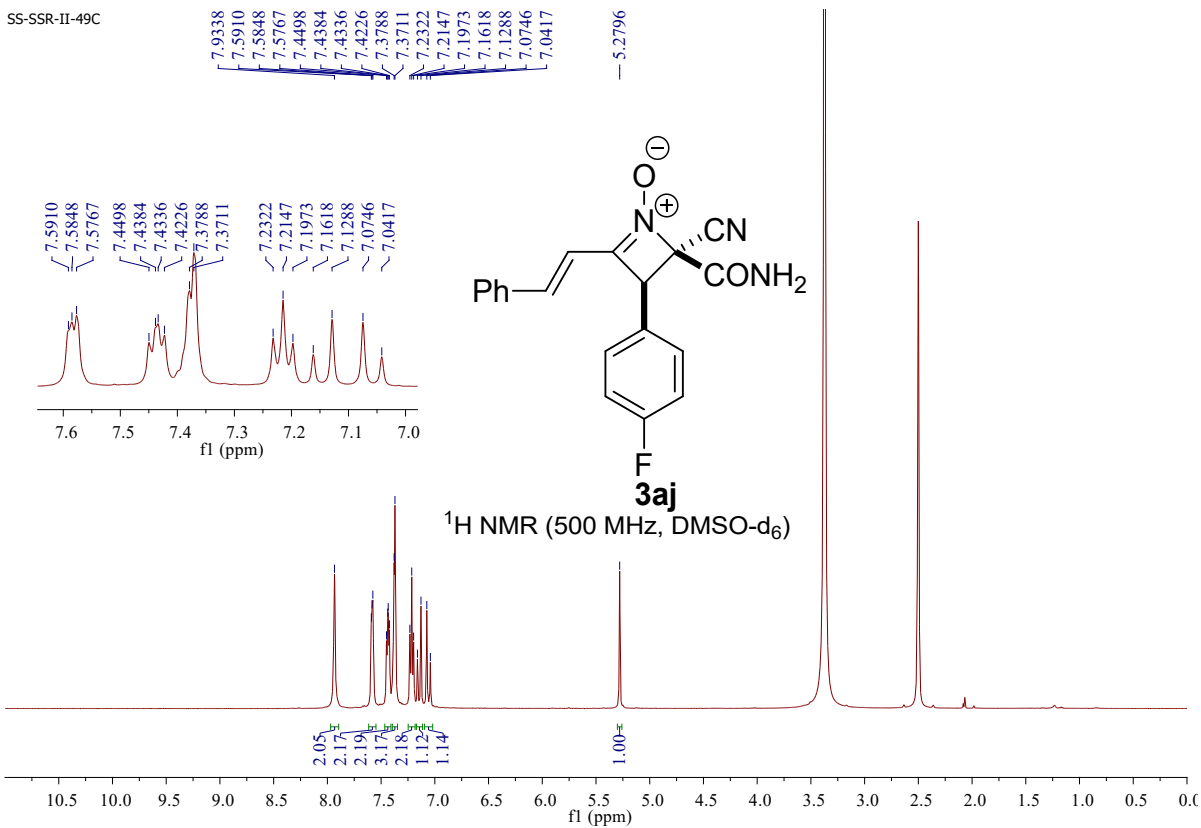

SS-SSR-II-47

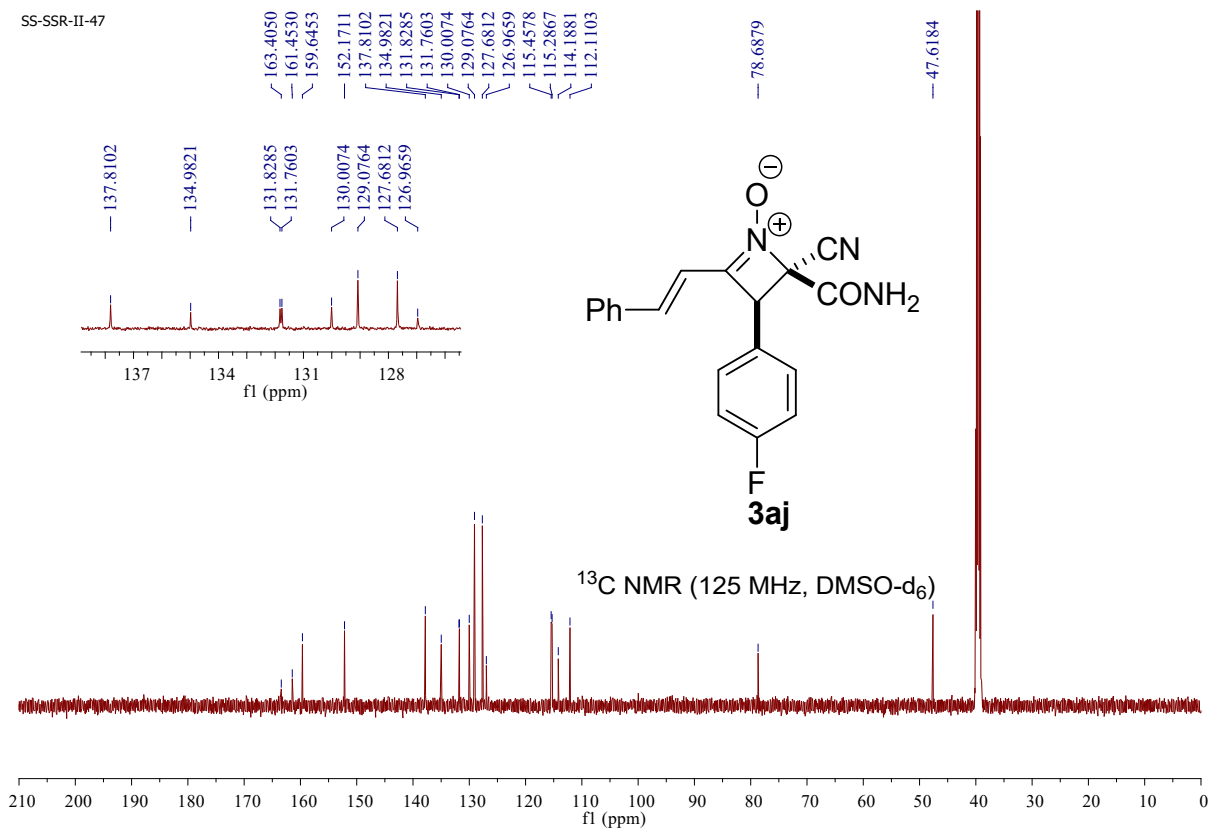

-112.8253  
-113.7824

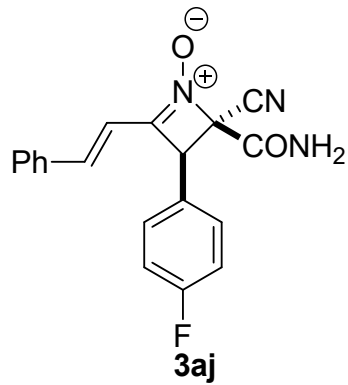

<sup>19</sup>F NMR (470 MHz, DMSO-d<sub>6</sub>)

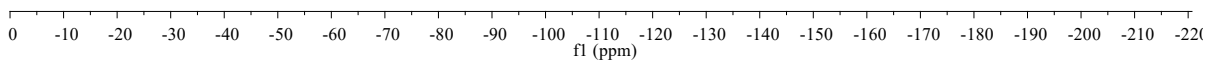

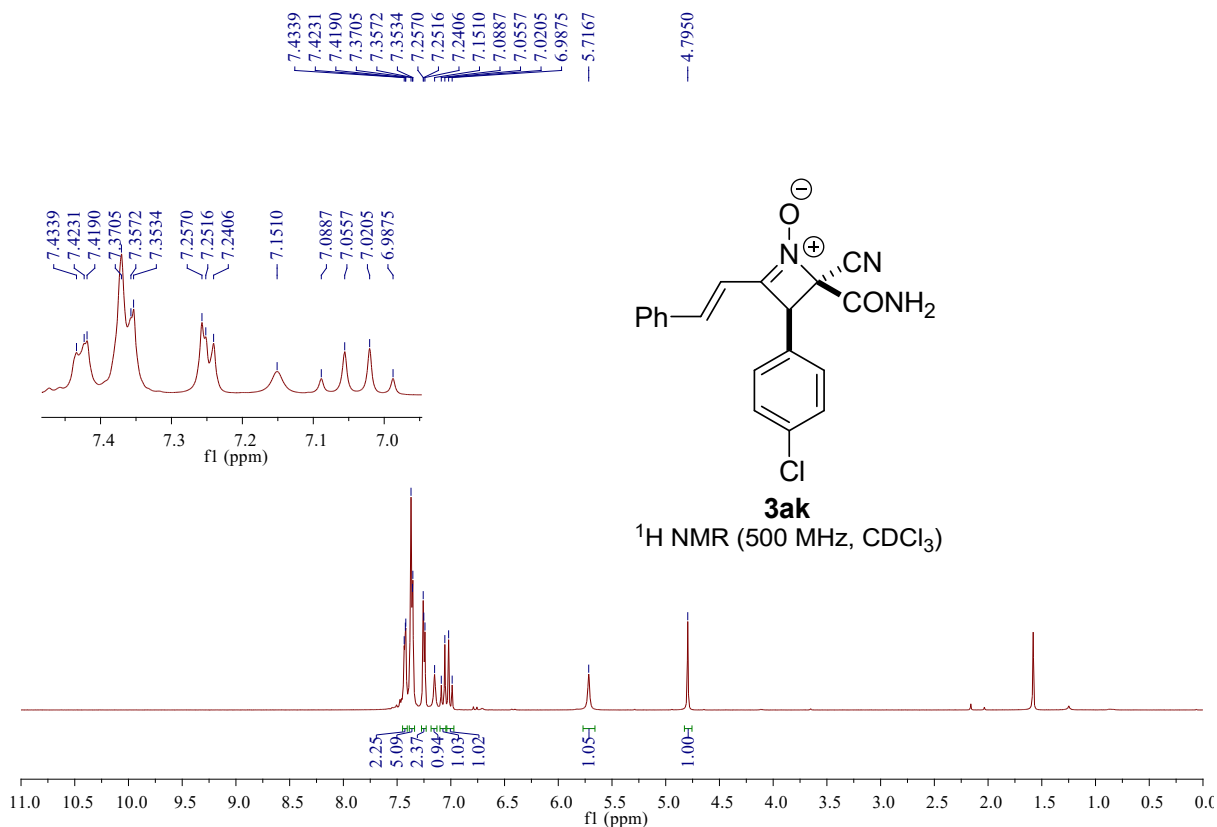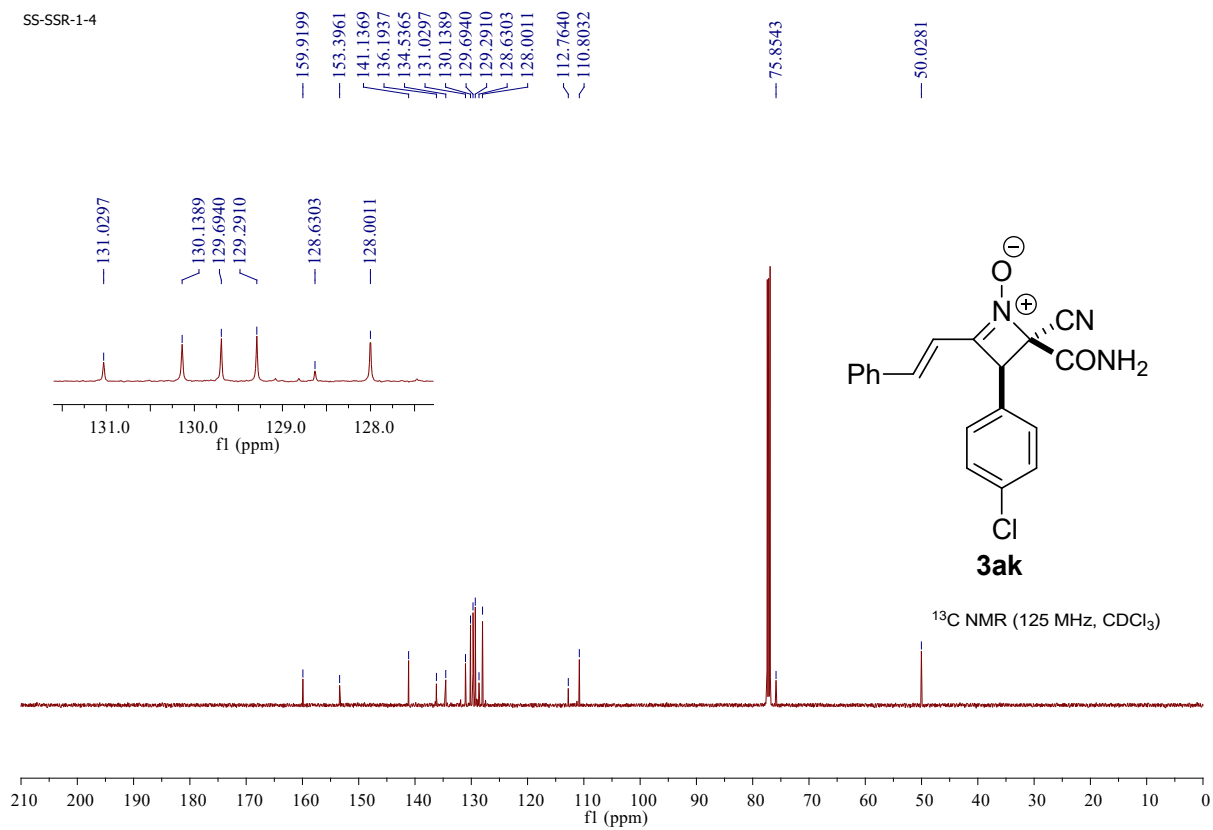



SS-SSR-II-M6-B

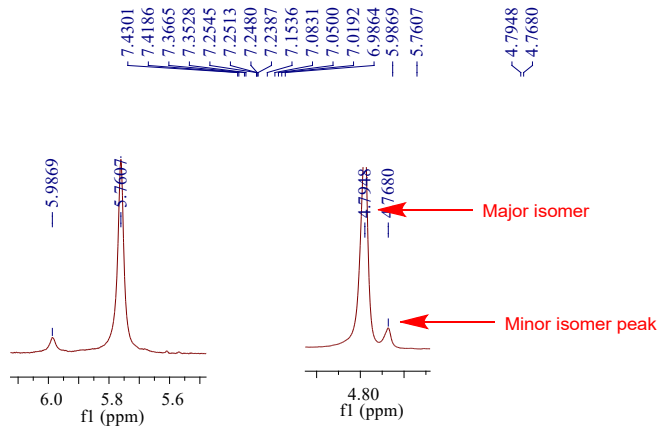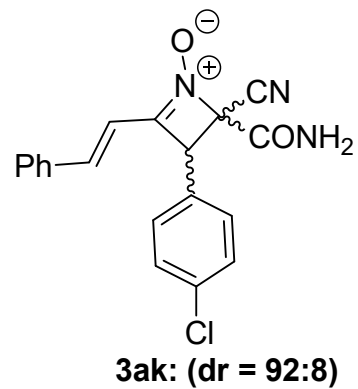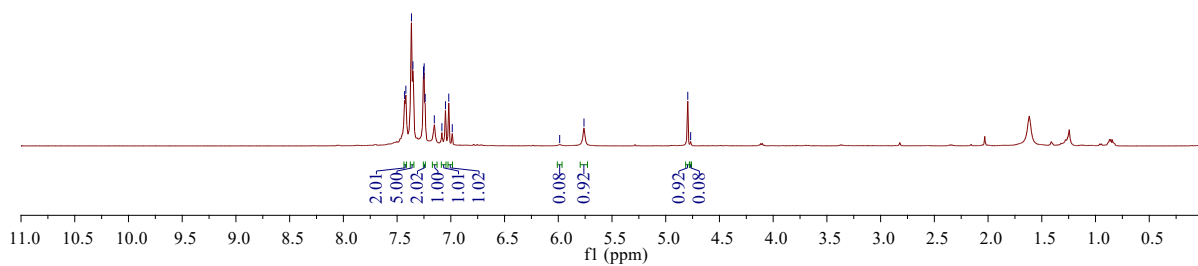

SS-AAR-11-6

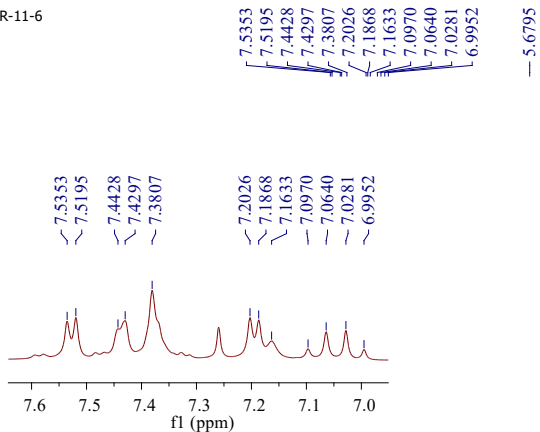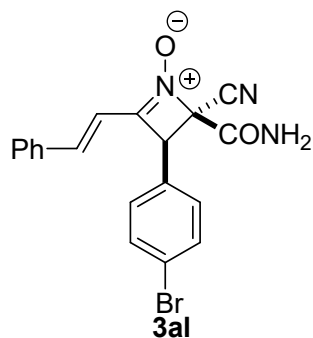

<sup>1</sup>H NMR (500 MHz, CDCl<sub>3</sub>)

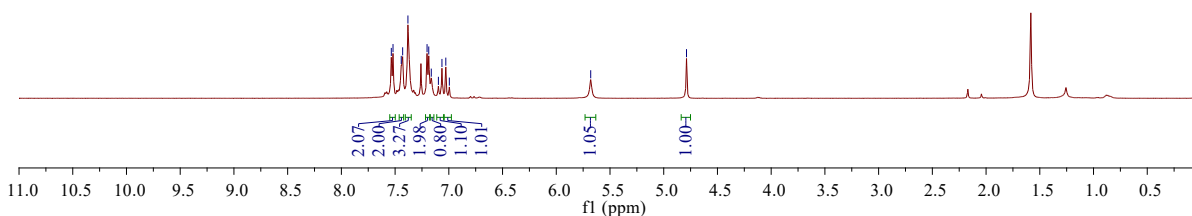

SS-AAR-11-6

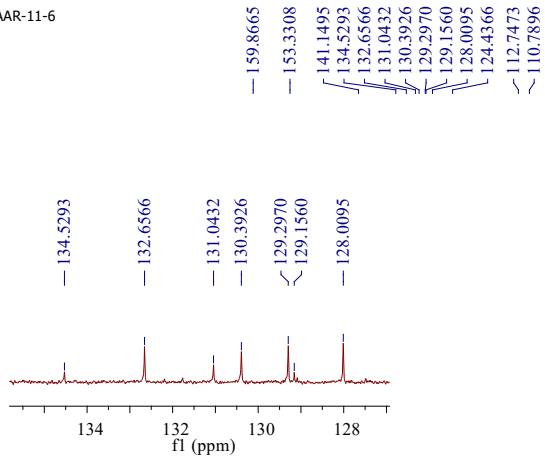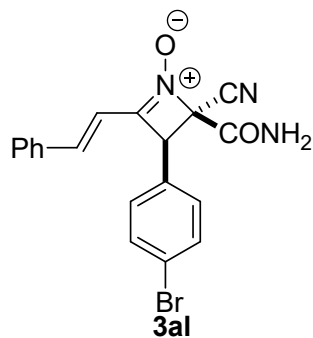

<sup>13</sup>C NMR (125 MHz, CDCl<sub>3</sub>)

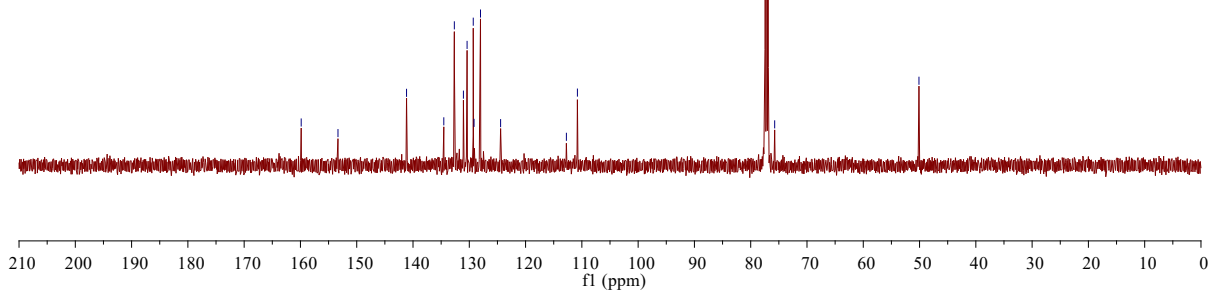

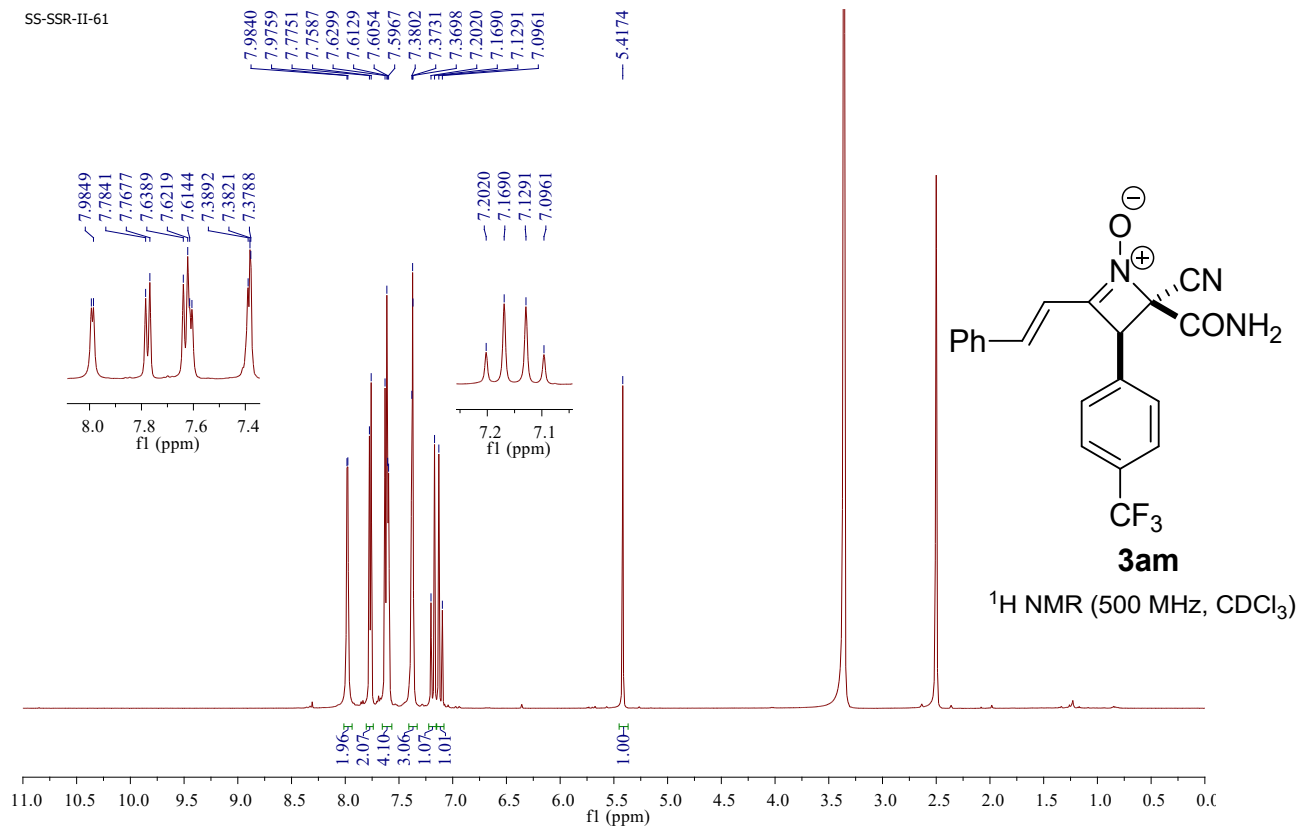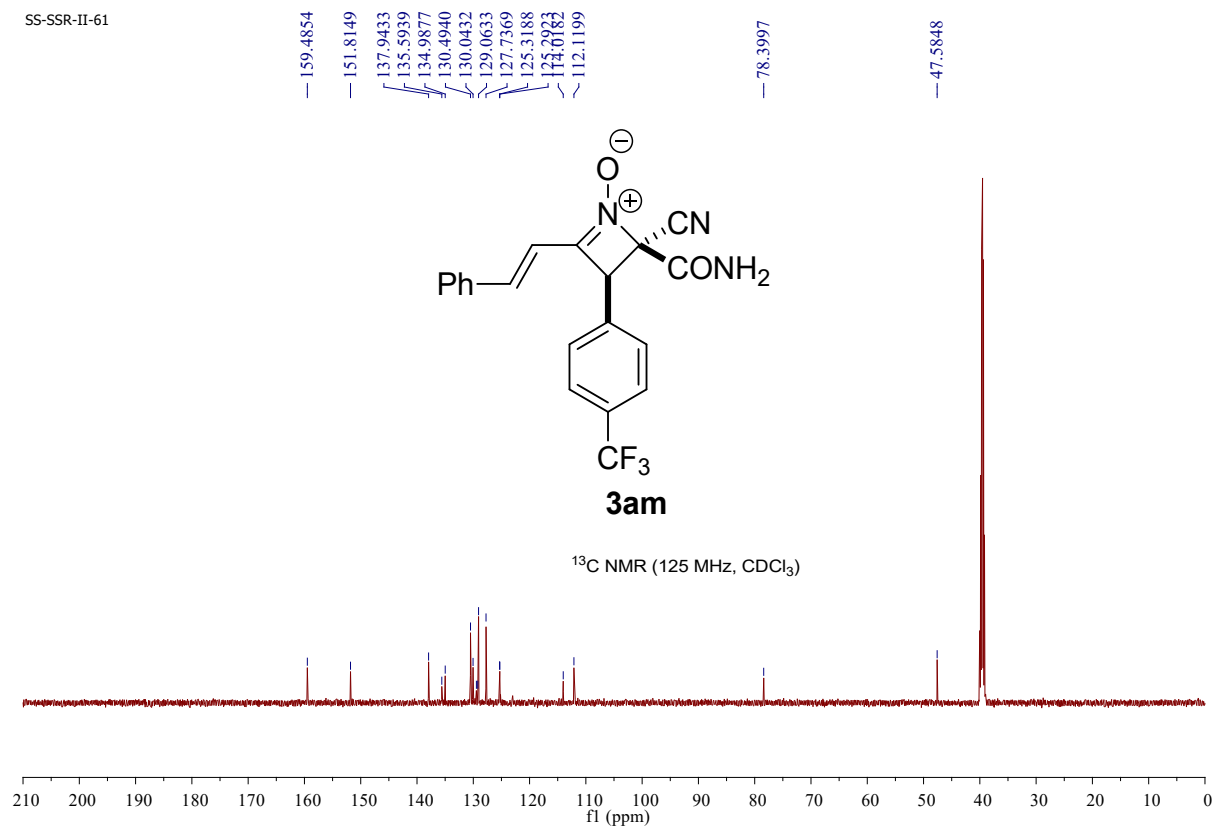

SS-SSR-II-69

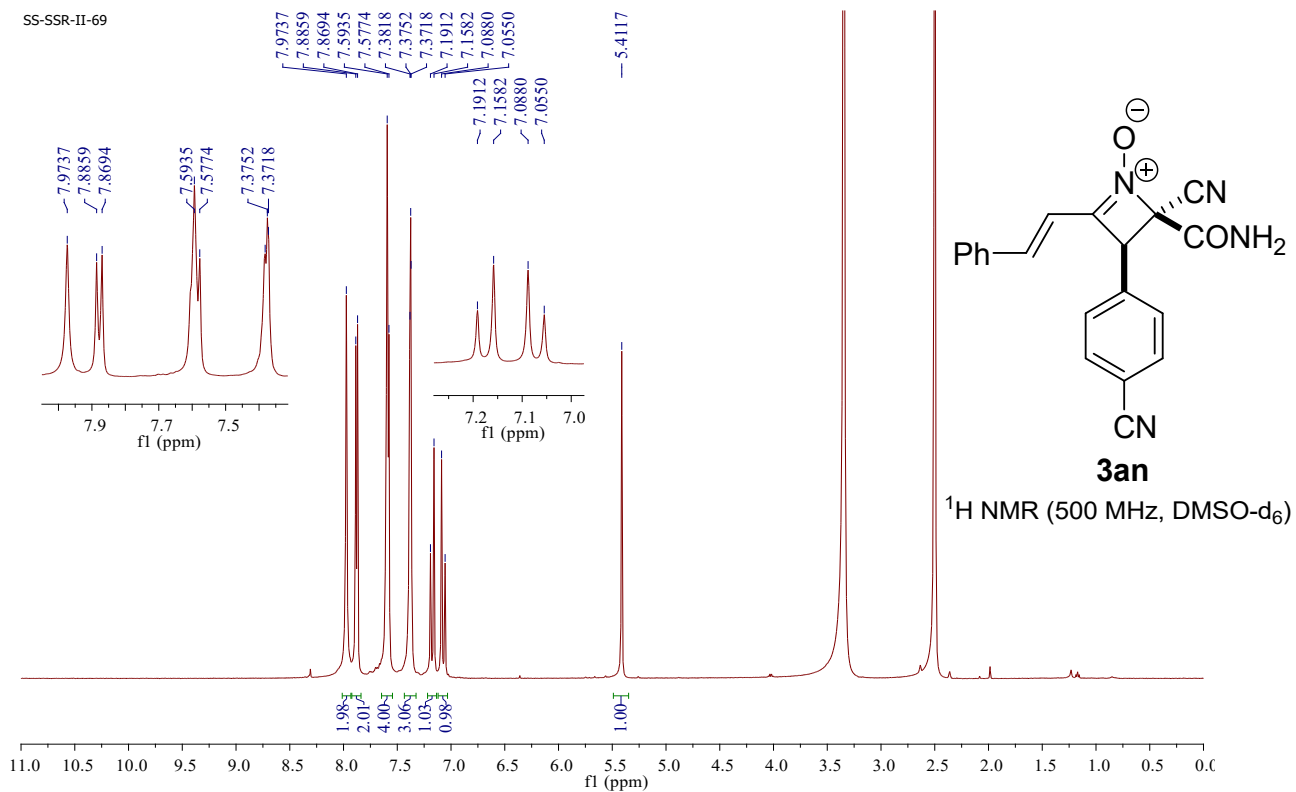

SS-SSR-II-69

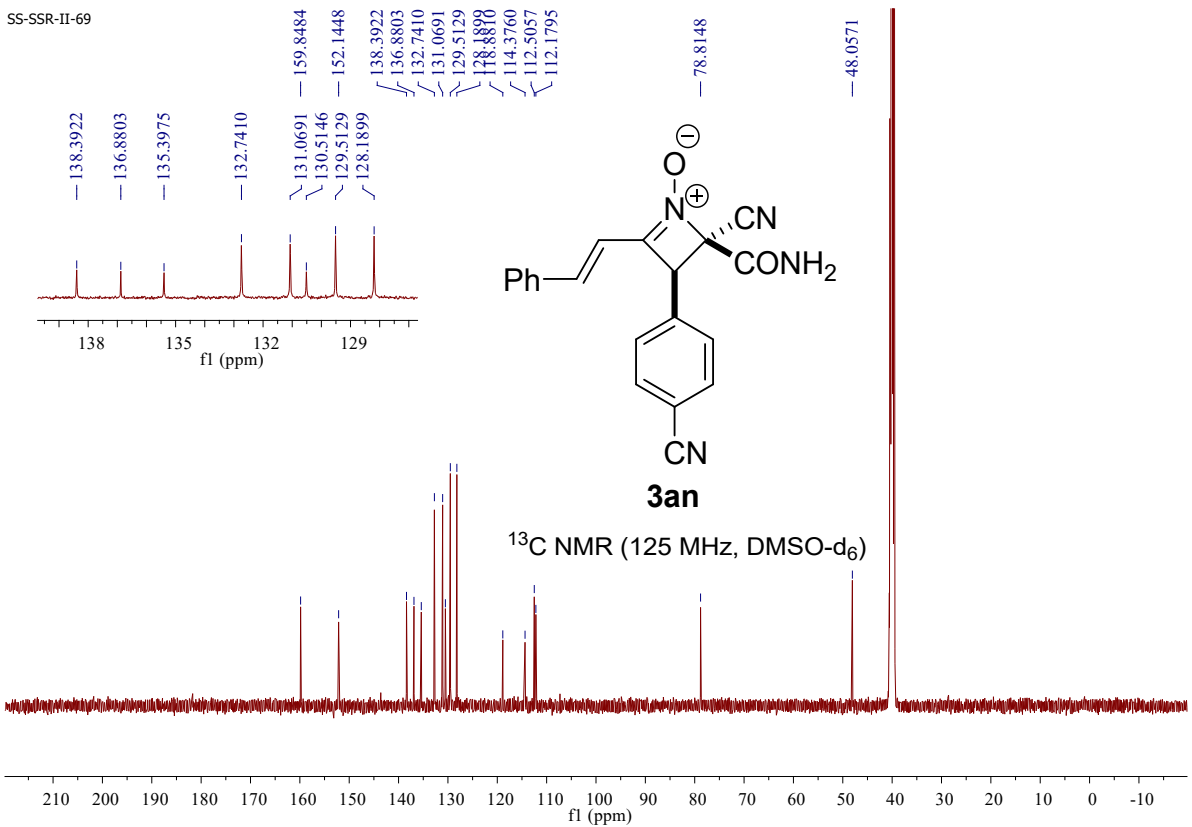

SS-SSR-II-19A

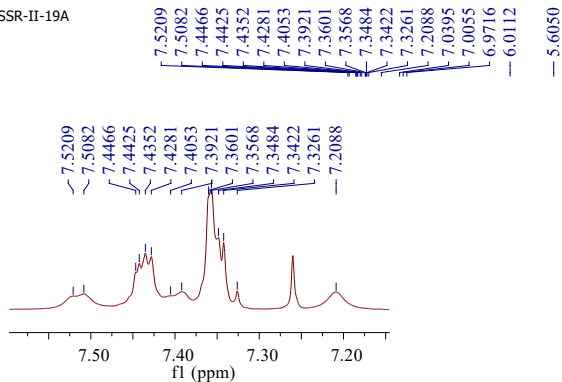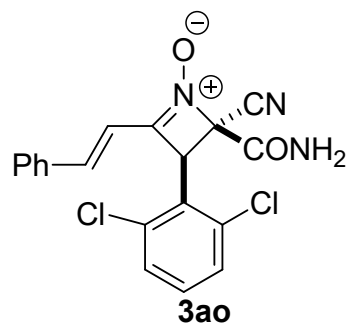

<sup>1</sup>H NMR (500 MHz, CDCl<sub>3</sub>)

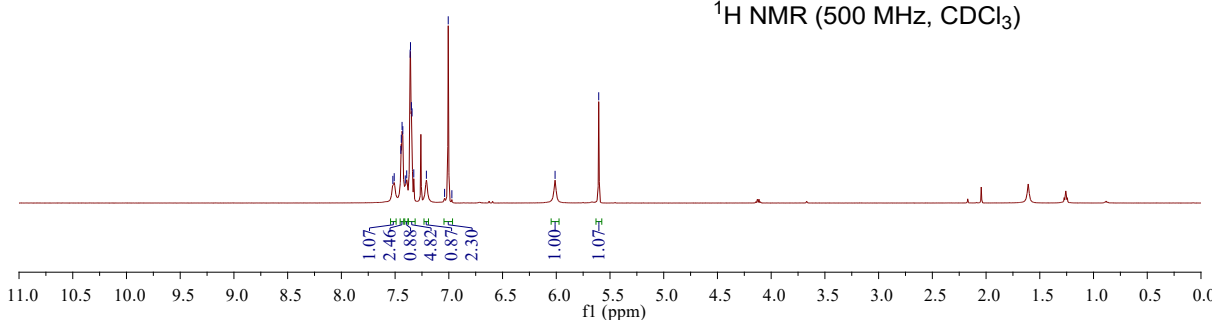

SS-SSR-II-19

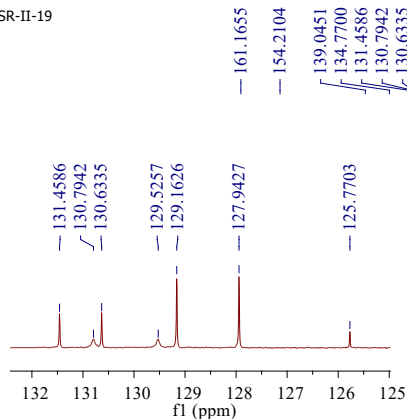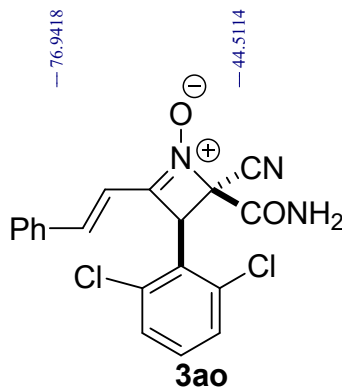

<sup>13</sup>C NMR (125 MHz, CDCl<sub>3</sub>)

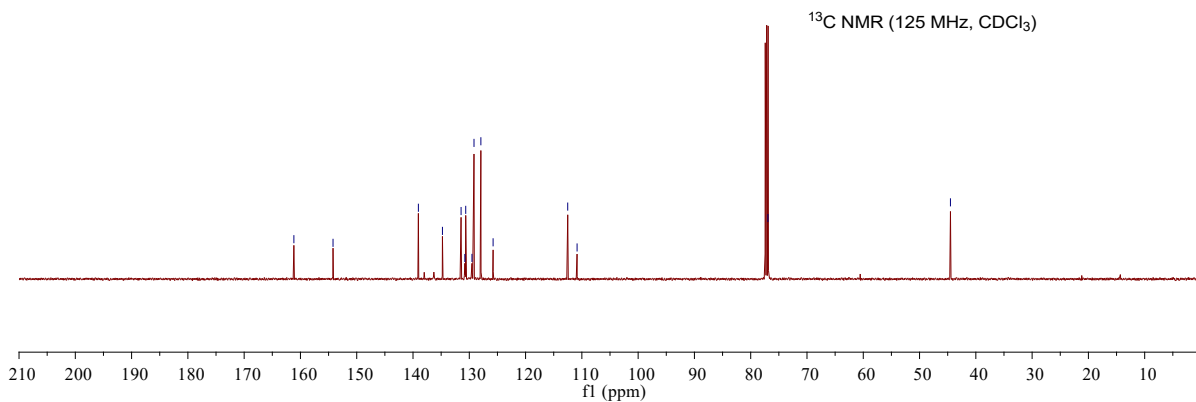

SS-SSR-II-14B

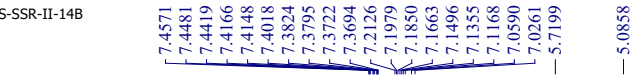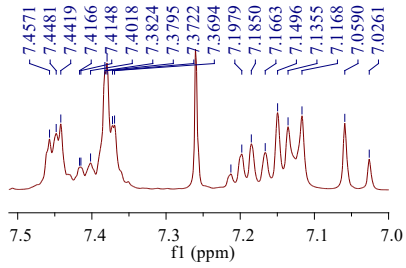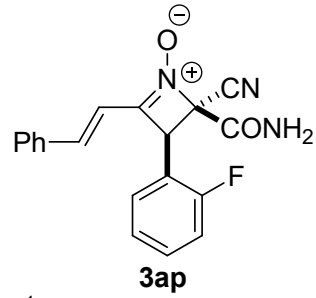

$^1\text{H}$  NMR (500 MHz,  $\text{CDCl}_3$ )

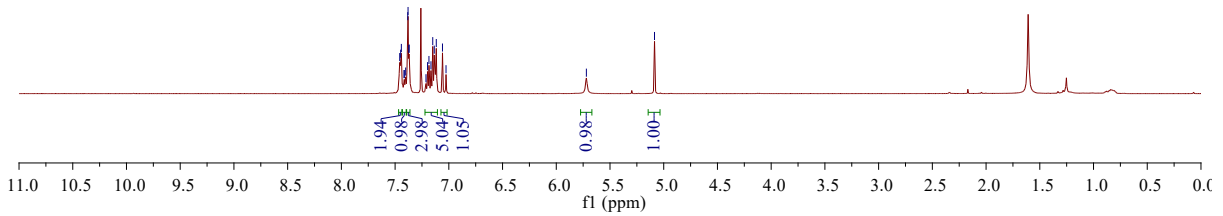

SS-SSR-II-11A

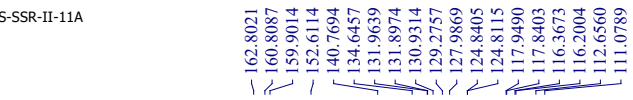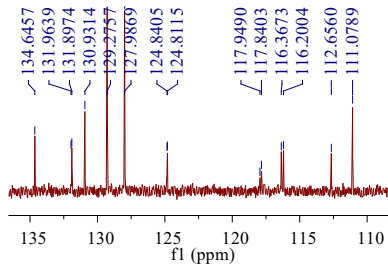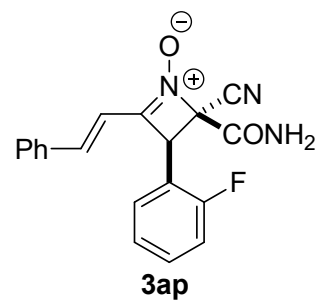

$^{13}\text{C}$  NMR (125 MHz,  $\text{CDCl}_3$ )

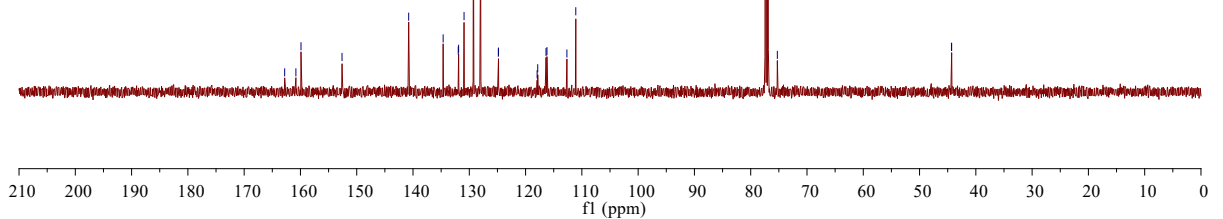

II

SS-SSR-II-131B

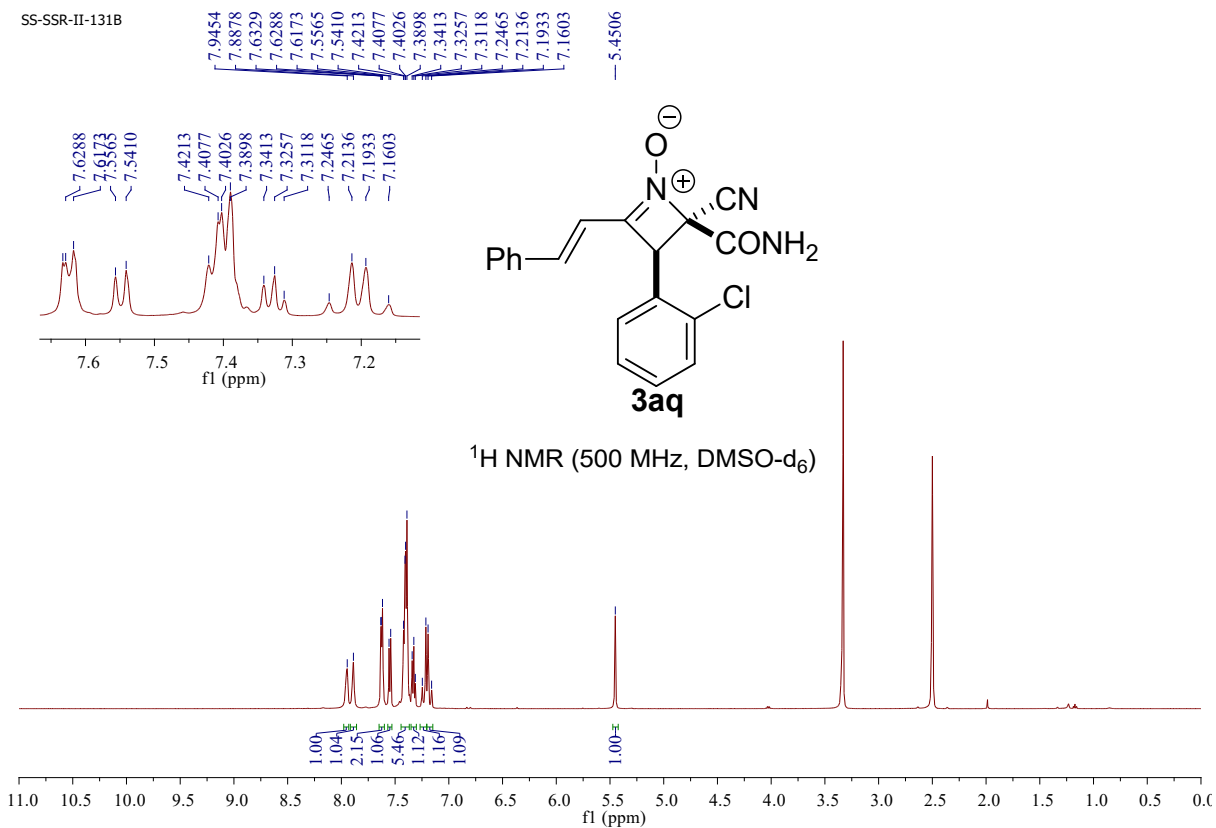

SS-SSR-II-131

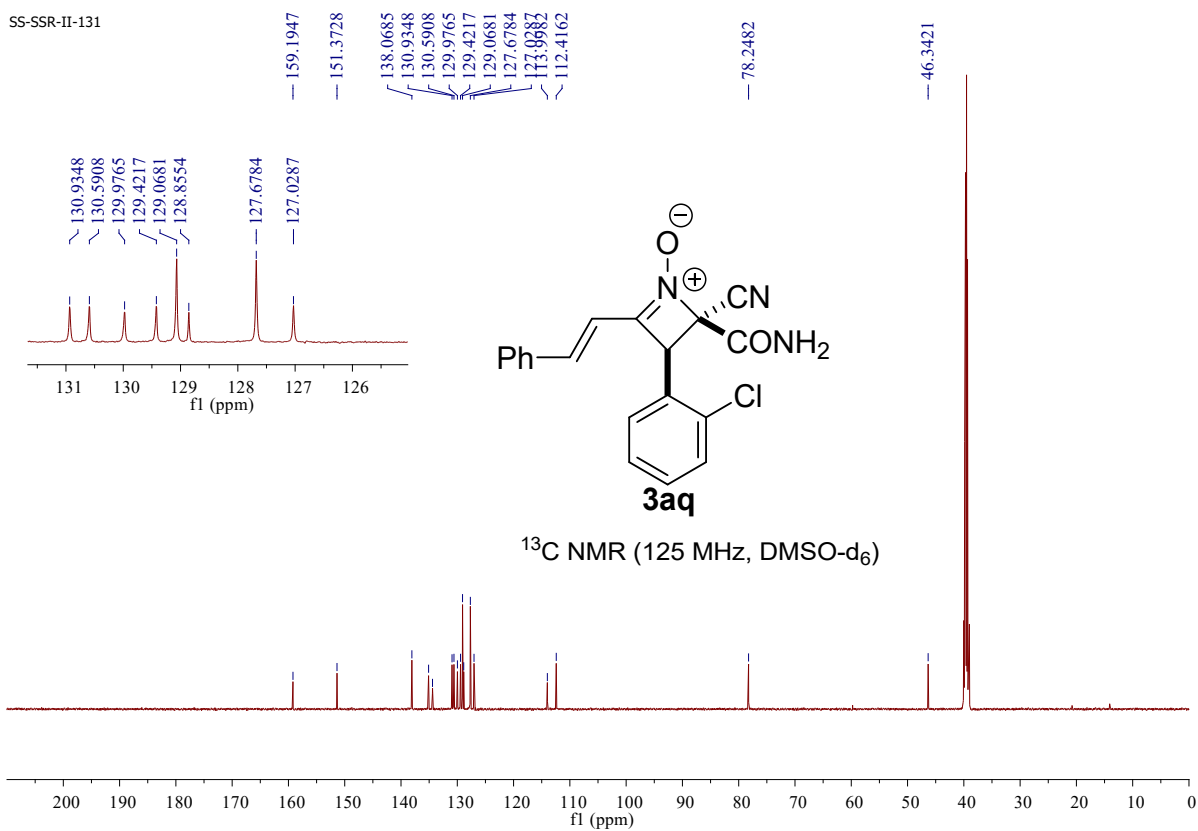

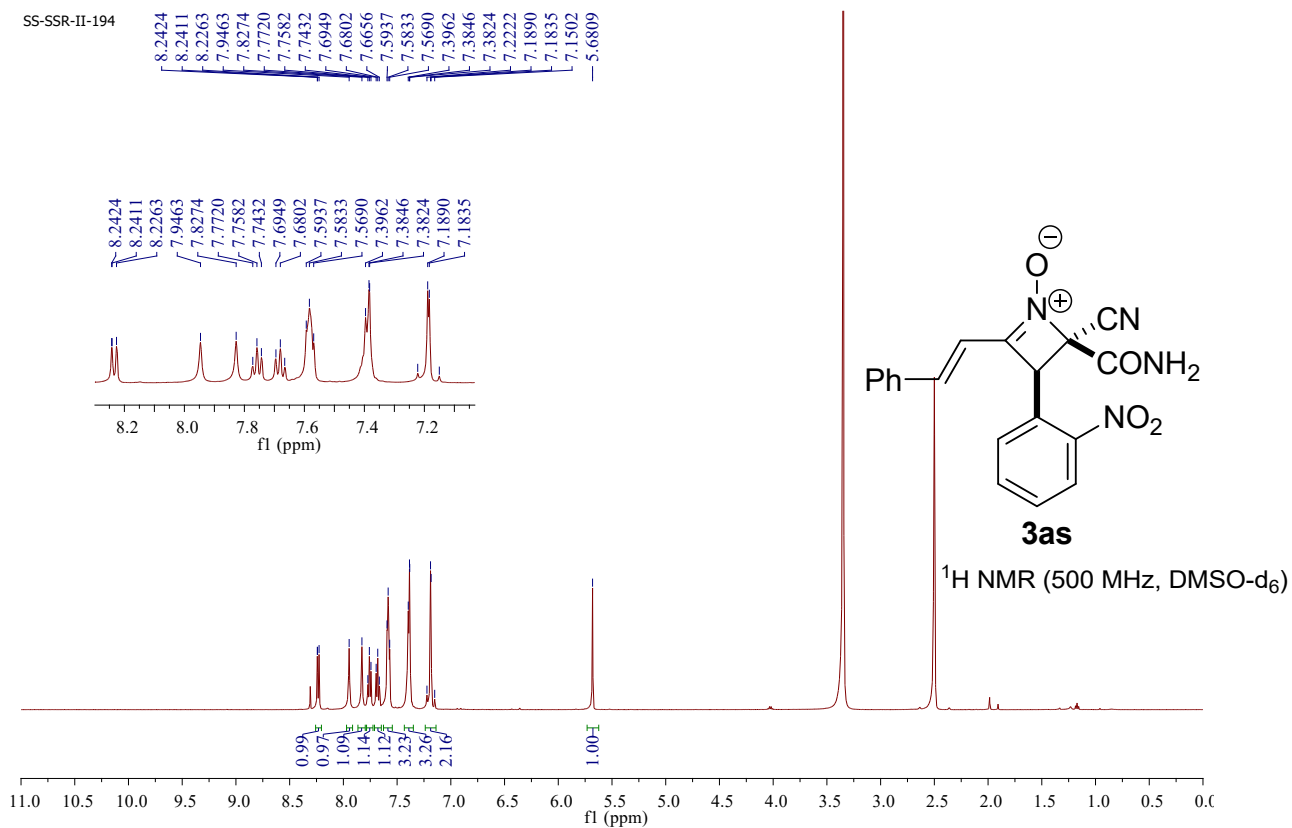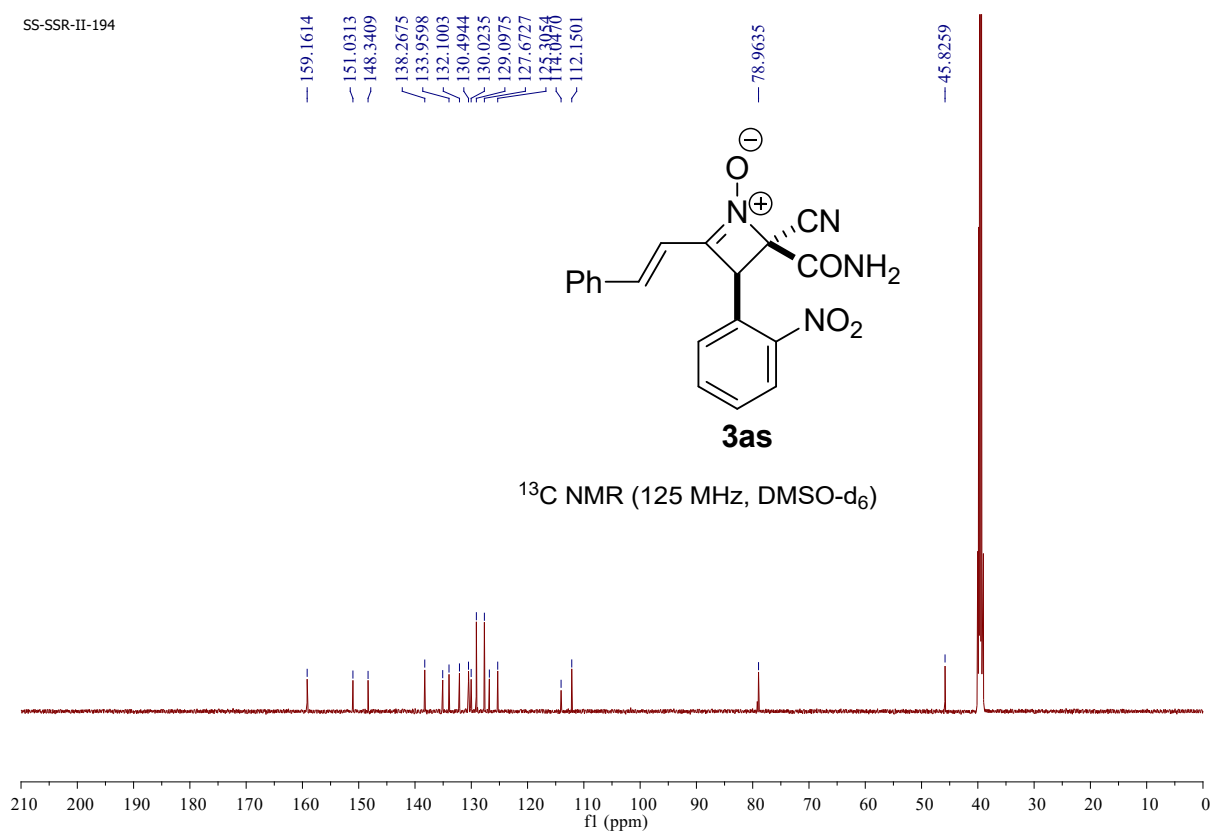



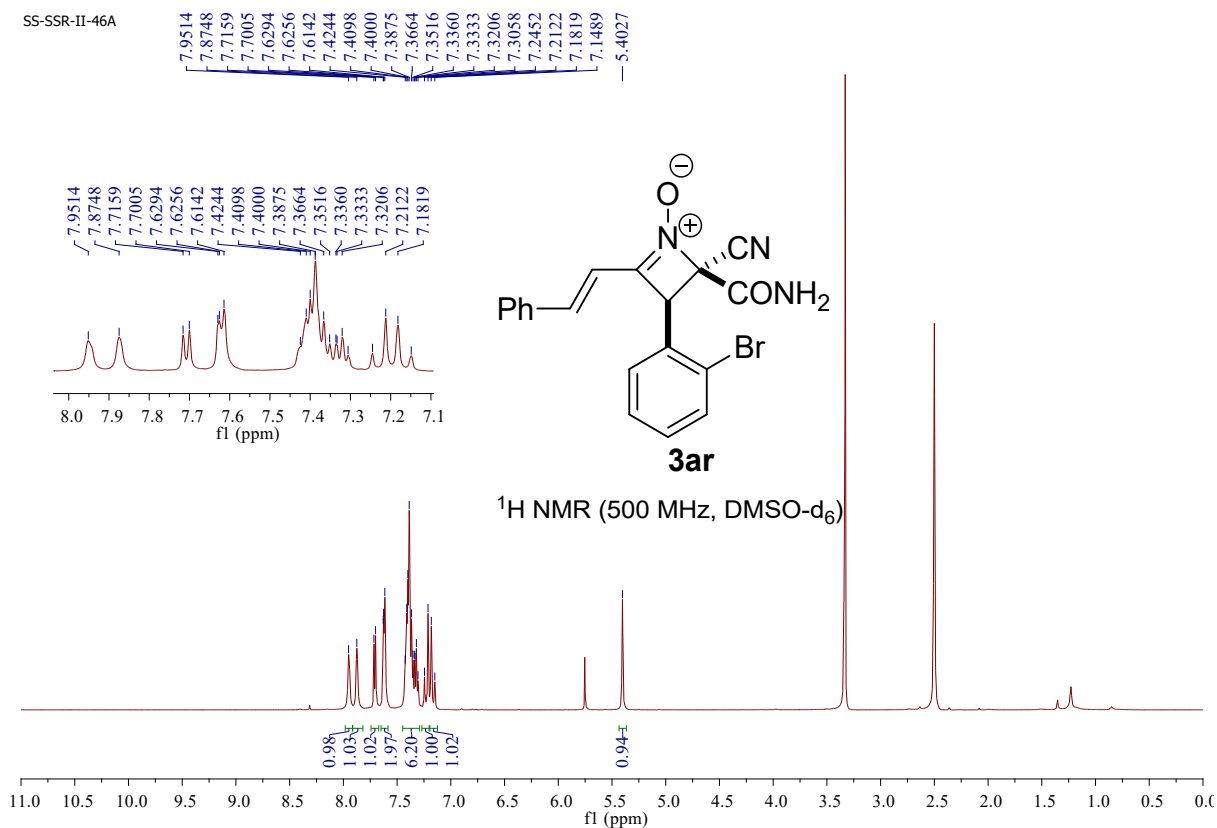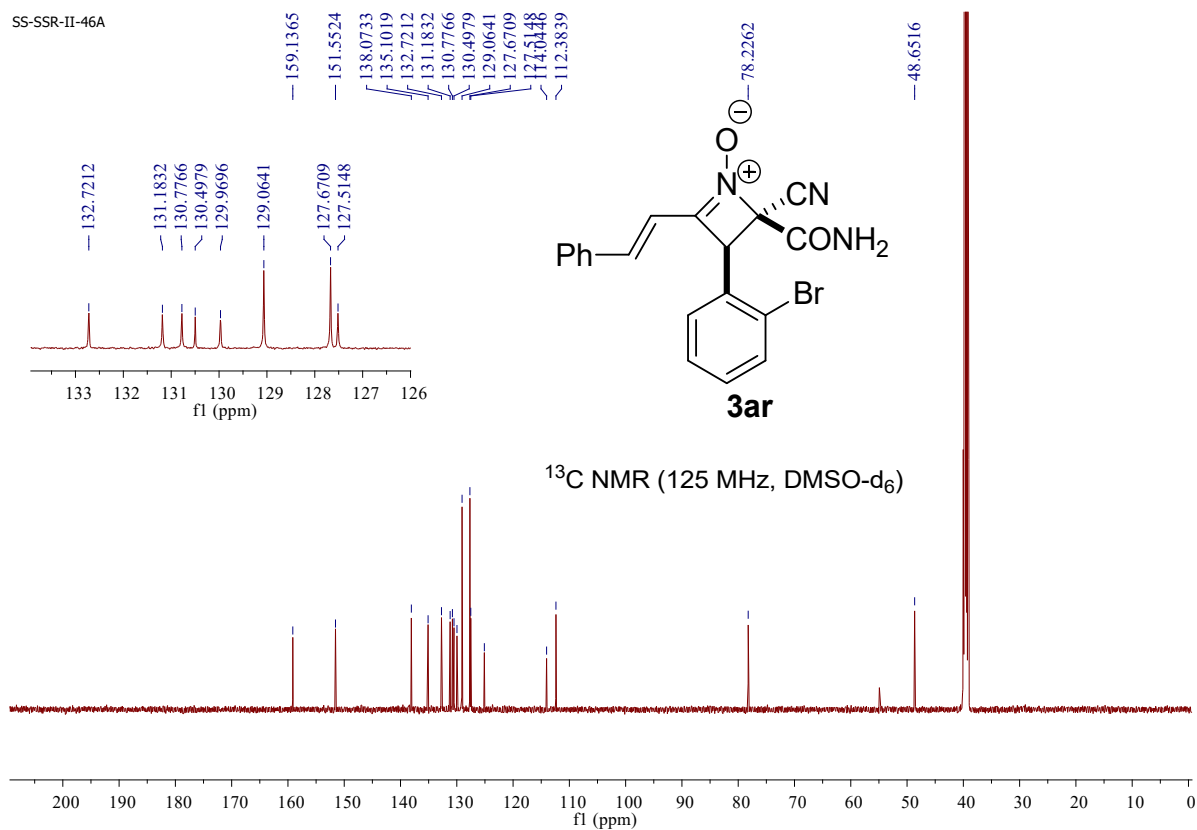

SS-SSR-II-22

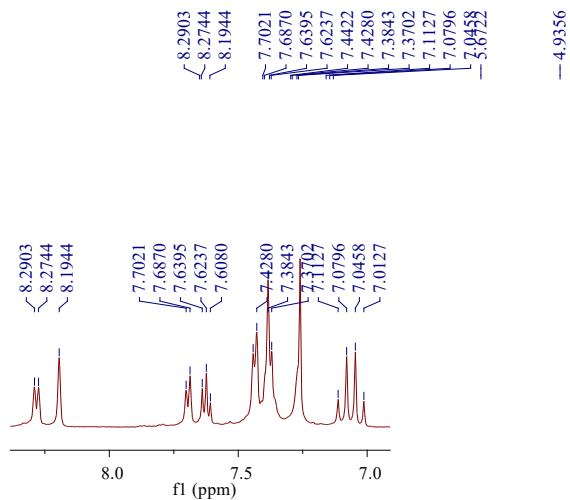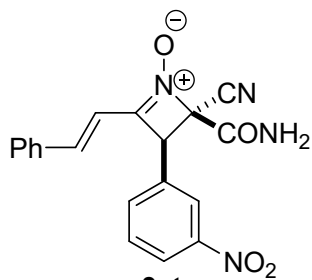

<sup>1</sup>H NMR (500 MHz, CDCl<sub>3</sub>)

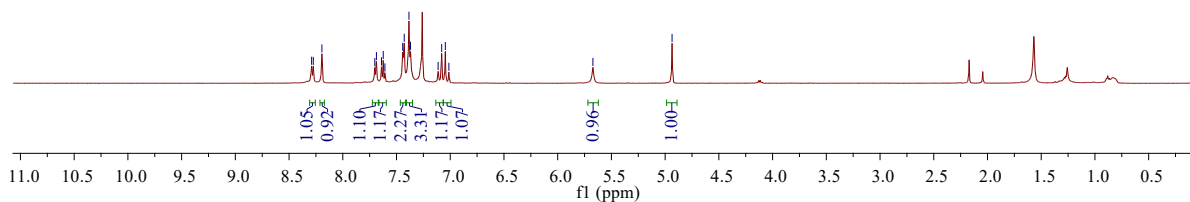

SS-SSR-II-22

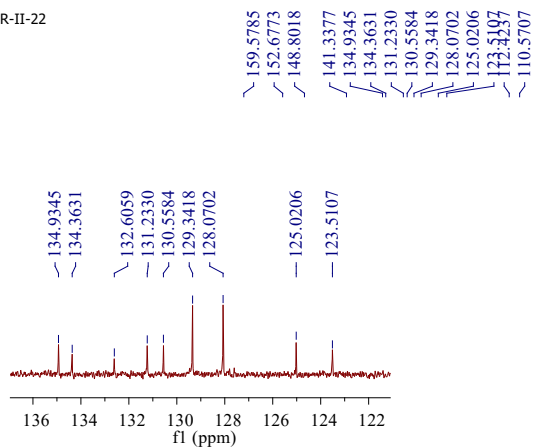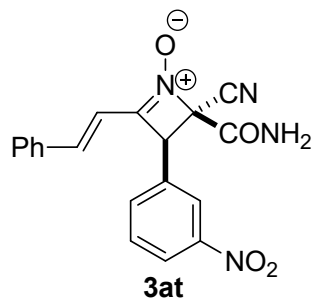

<sup>13</sup>C NMR (125 MHz, CDCl<sub>3</sub>)

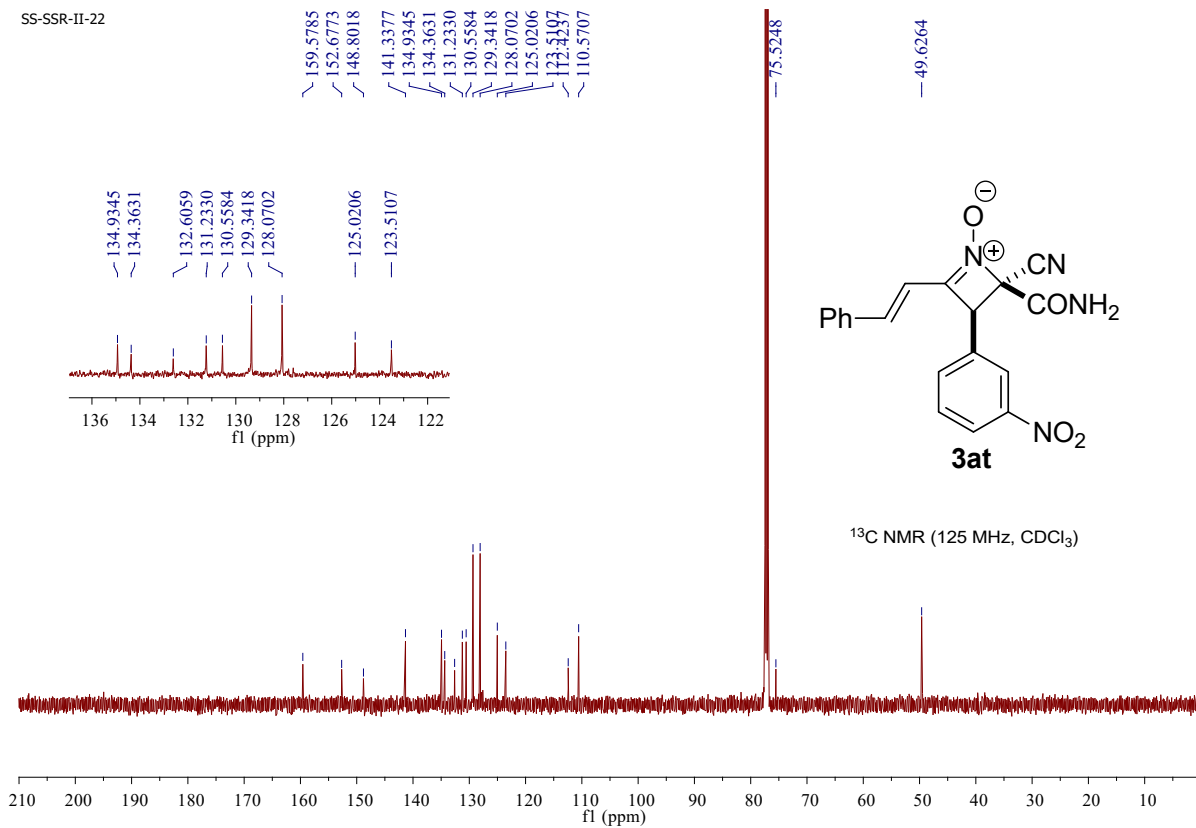

SS-SSR-II-64A

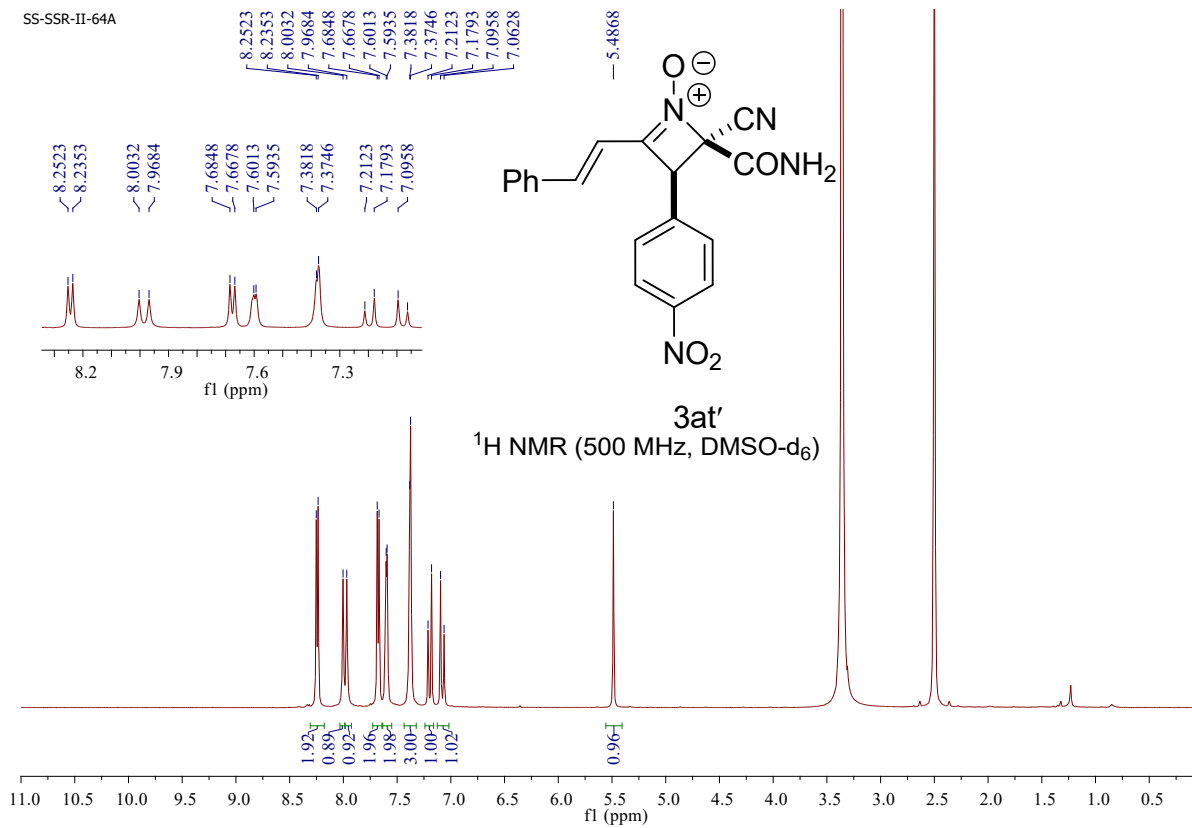

2

SS-SSR-II-64A

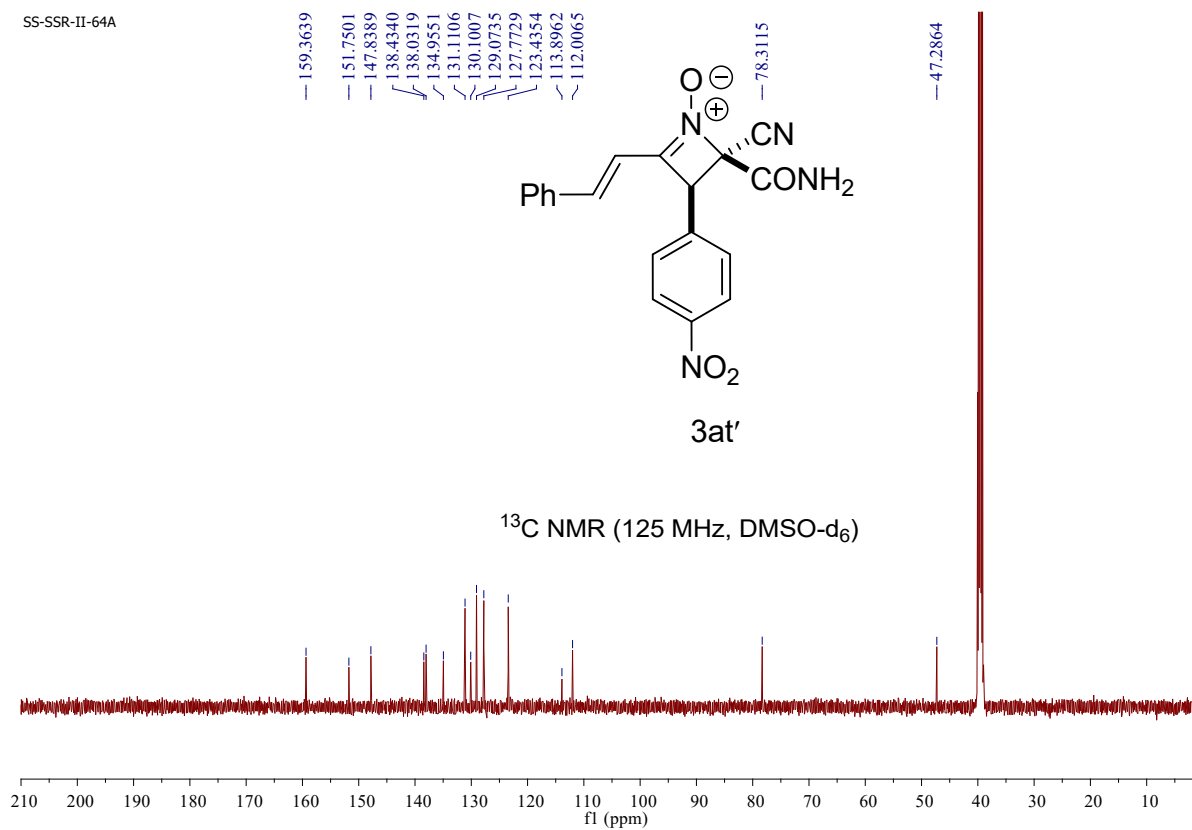

SS-SSR-II-39A

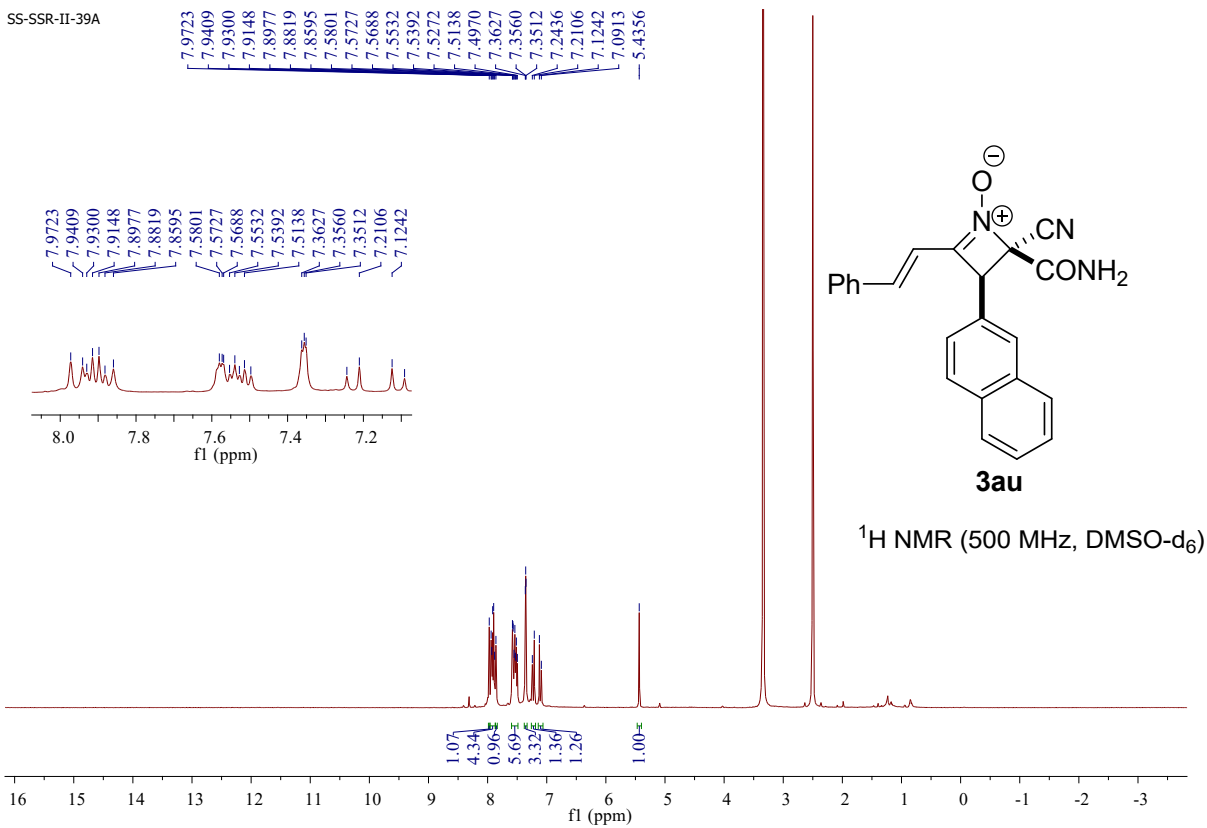

SS-SSR-II-39A

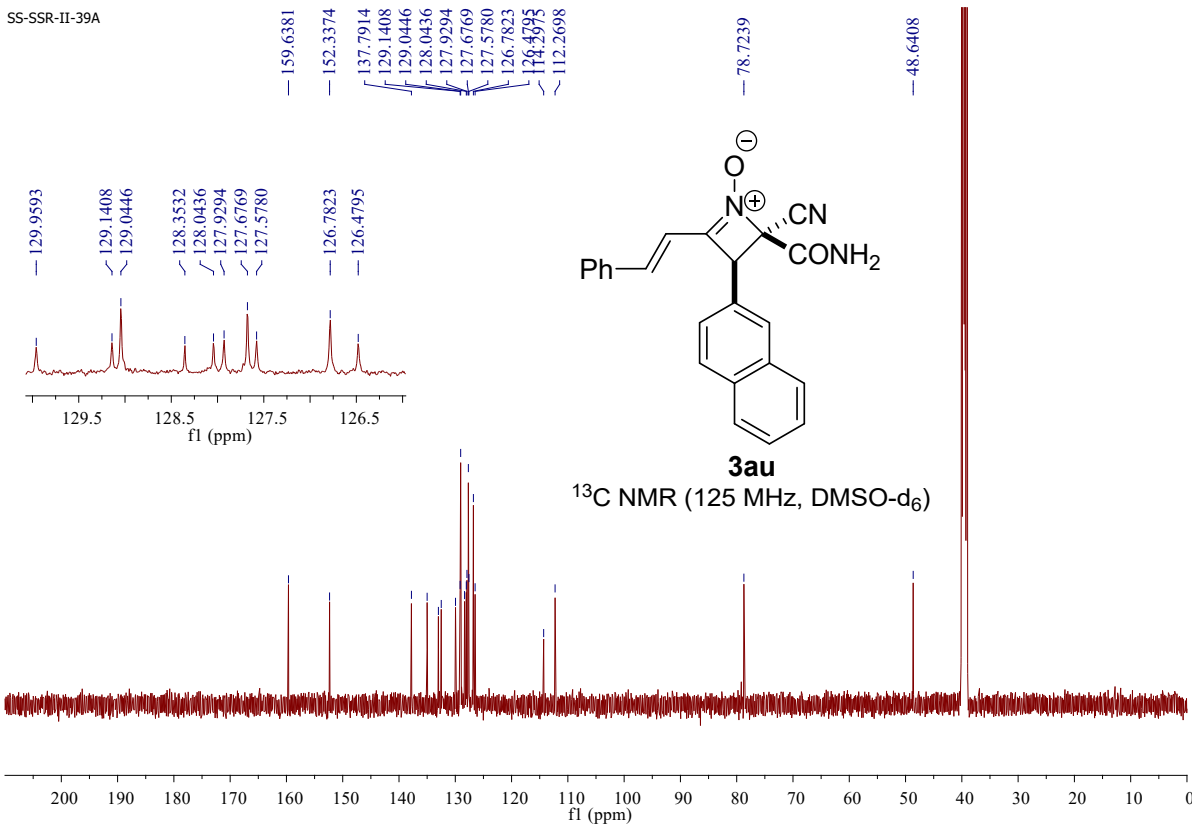

SS-SSR-II-43A

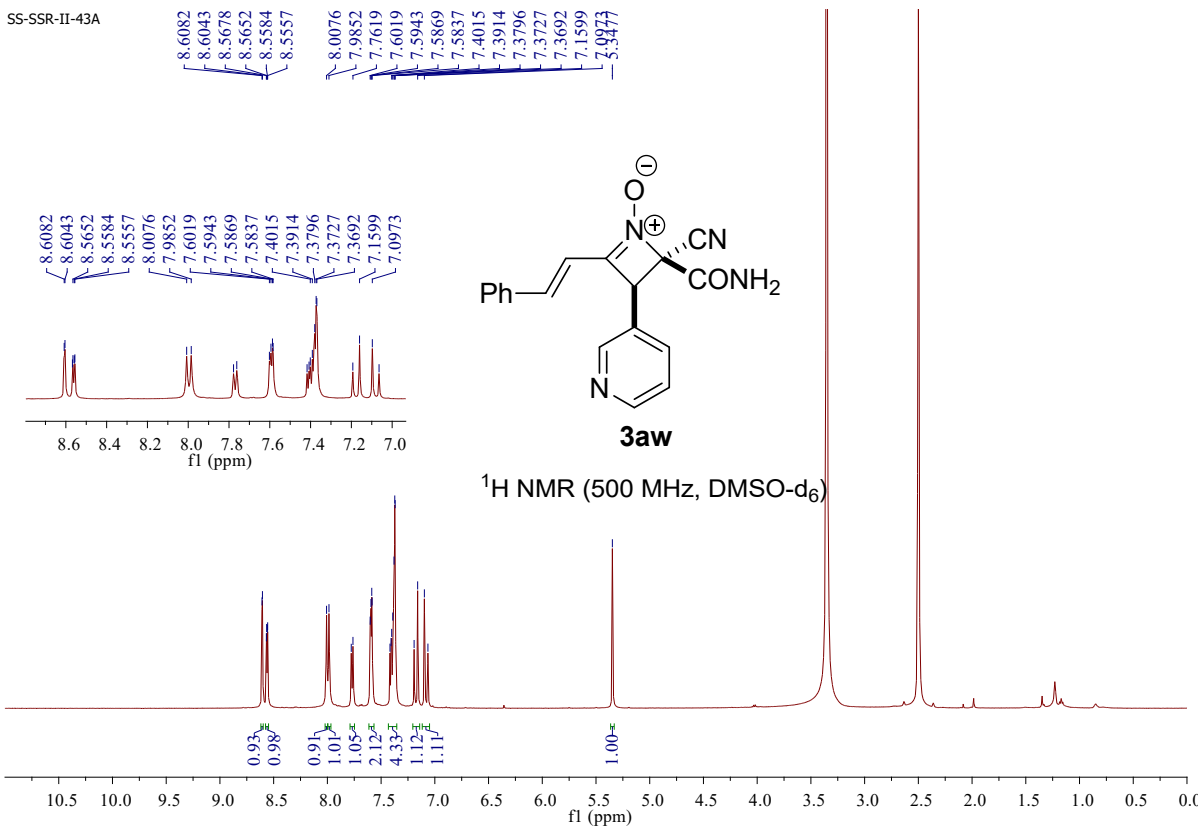

SS-SSR-II-43A

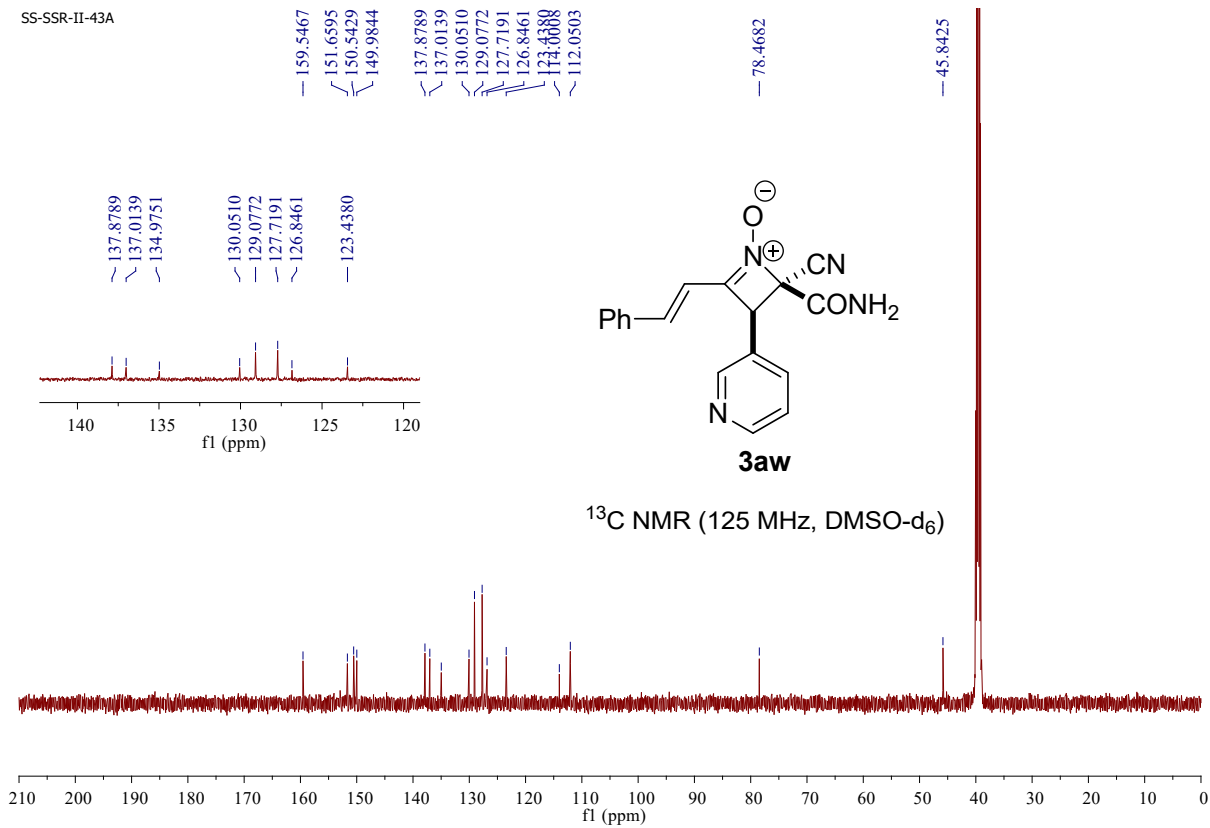

8.4216  
8.4081  
8.3954  
8.3785  
8.3637  
8.3658  
8.2597  
8.2503  
8.2421  
8.1882  
8.1702  
8.1580  
8.1427  
8.0928  
8.0773  
7.9227  
7.6890  
7.6177  
7.6111  
7.5754  
7.3577  
7.2029  
7.3417

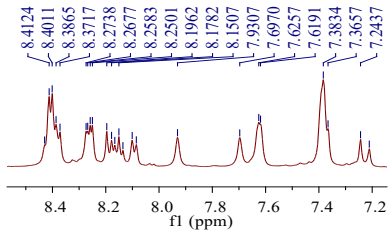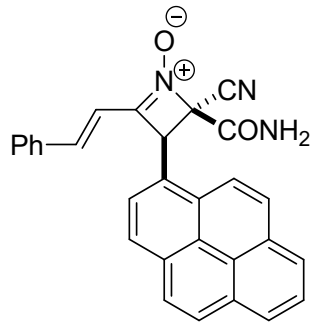

**3av**  
 $^1\text{H NMR}$  (500 MHz,  $\text{DMSO-d}_6$ )

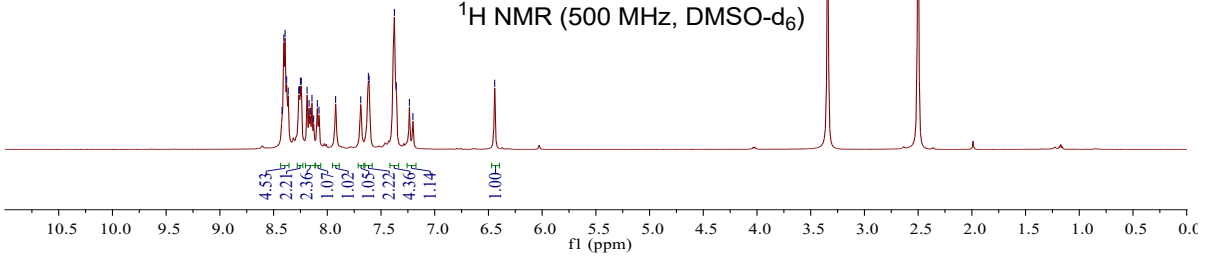

SS-SSR-II-54

159.5663  
152.5249  
138.1382  
129.0731  
128.1002  
127.7020  
127.2178  
125.9147  
125.7738  
124.8169  
124.4025  
124.1641  
123.9636  
123.5856  
122.8169  
79.0291  
46.1574

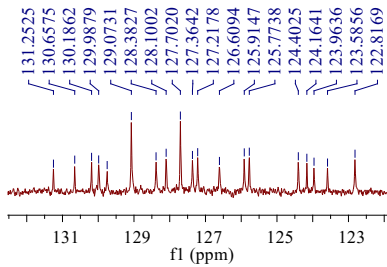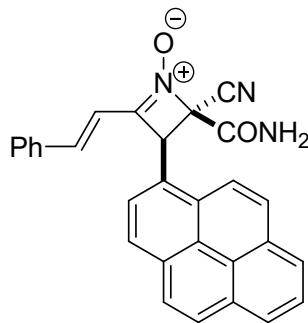

**3av**

$^{13}\text{C NMR}$  (125 MHz,  $\text{DMSO-d}_6$ )

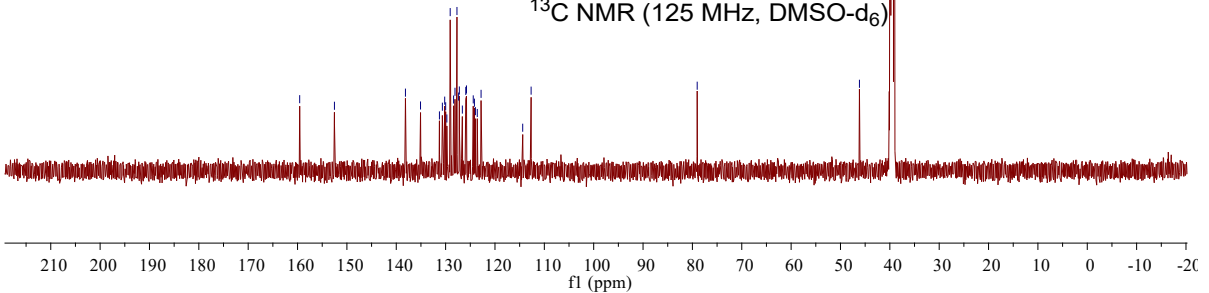

SS-SSR-II-55C

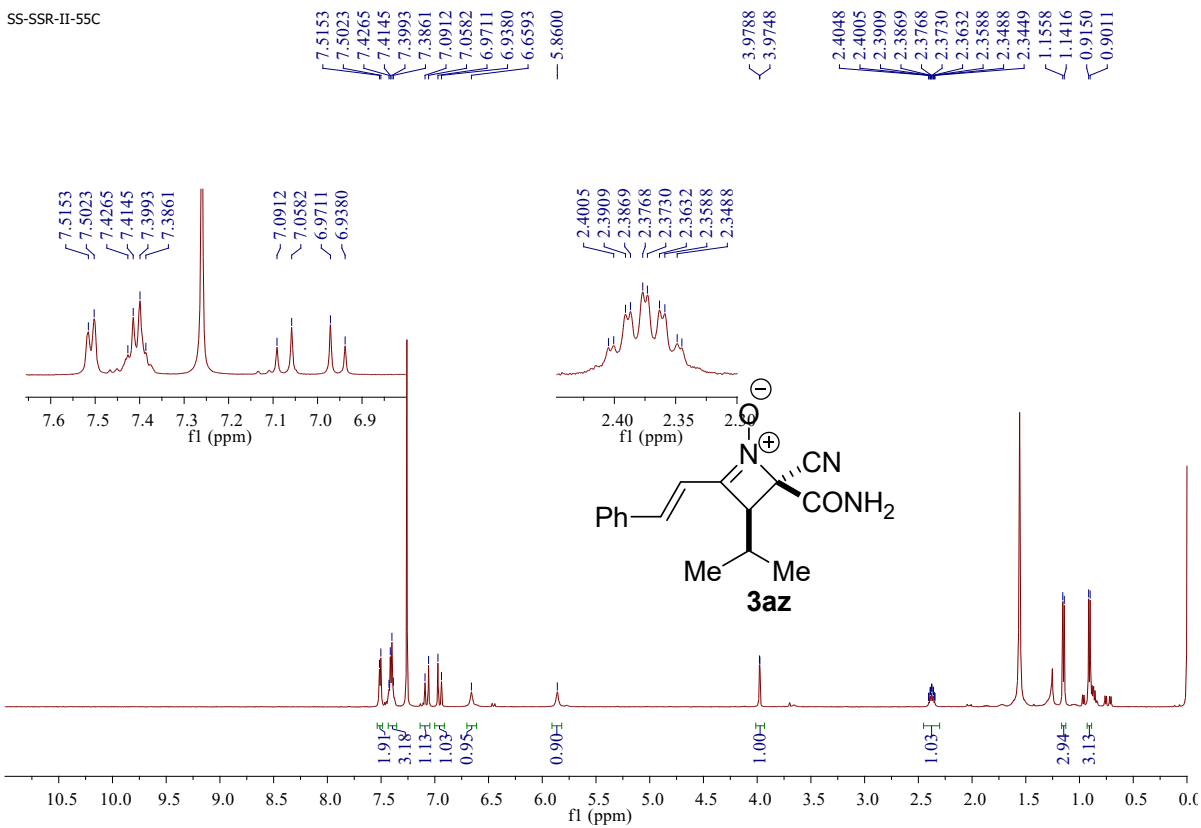

SS-SSR-II-55A

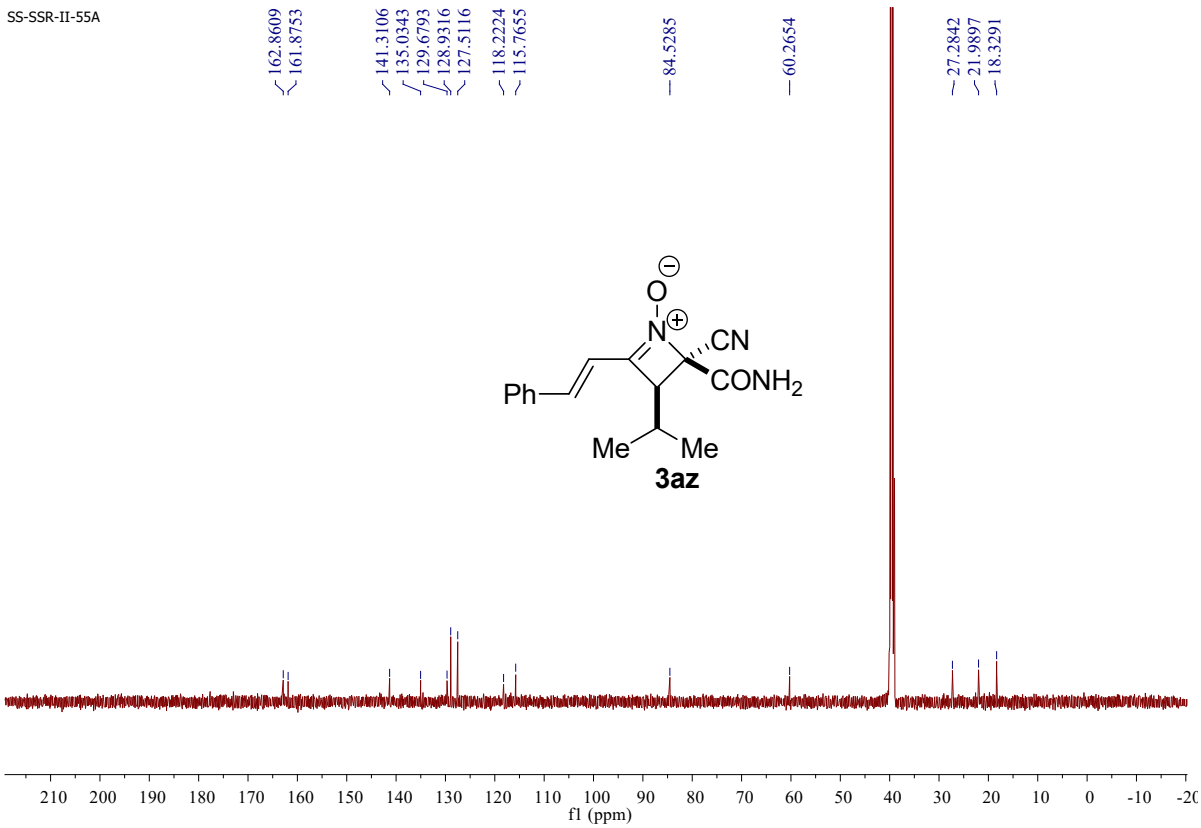

SS-SSR-II-75

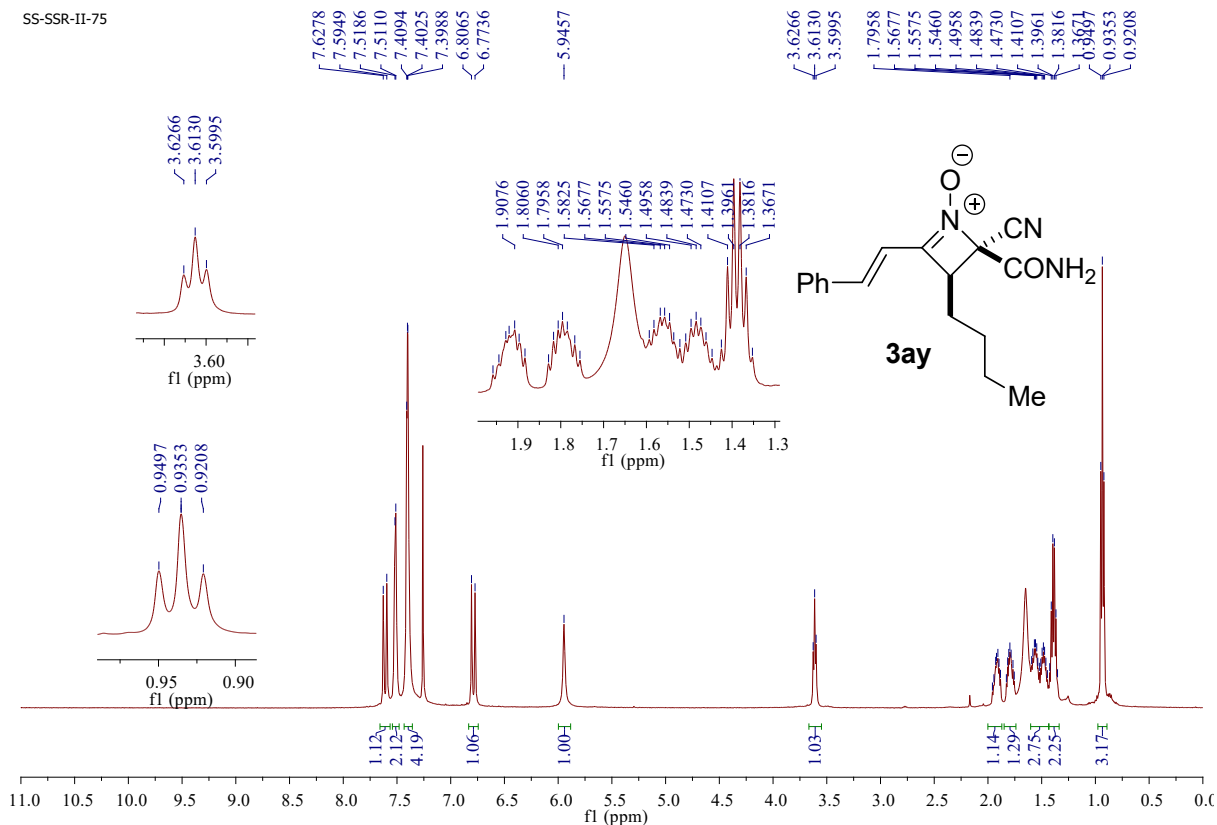

SS-SSR-II-75

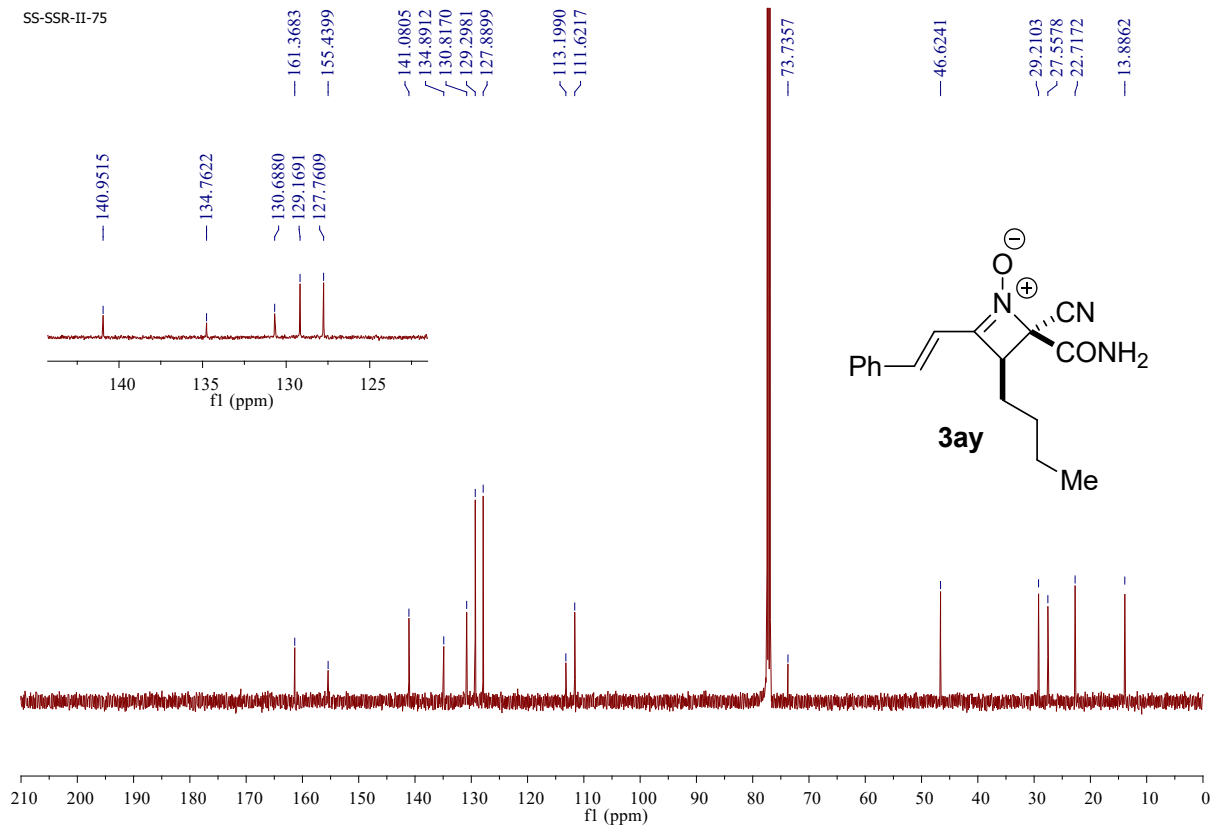



8.1473  
8.1095  
8.0903  
8.0599  
8.0402  
8.0241  
7.4994  
7.4824  
7.4100  
7.3927  
7.3358  
7.1617  
7.1197  
— 5.9809  
— 5.6909  
5.0398  
4.9906  
3.8729  
3.8378

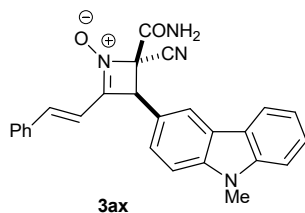

<sup>1</sup>H NMR (400 MHz, CDCl<sub>3</sub>)

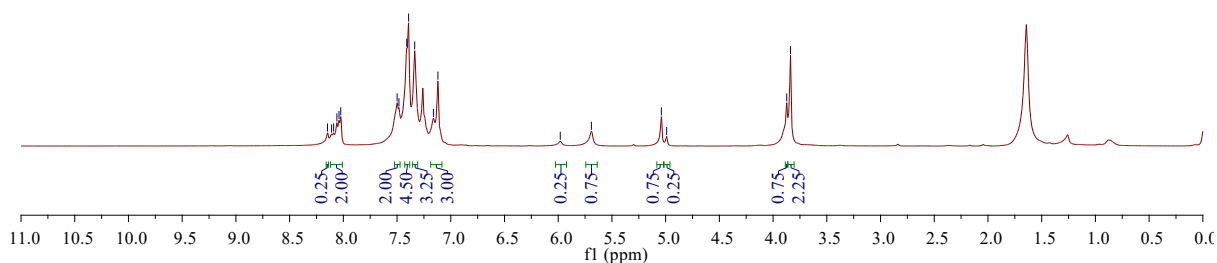

SS-SSR-II-235A

161.8677  
160.4359  
154.5555  
154.1353  
141.6152  
141.5426  
141.1273  
134.7281  
130.7633  
129.1682  
127.9682  
127.9367  
126.6081  
126.0020  
122.2790  
120.8953  
120.6834  
119.8826  
119.6123  
119.5930  
111.1612  
109.3654  
108.9185  
107.9588  
— 60.5574  
51.7191  
49.2501  
31.0649  
29.3411

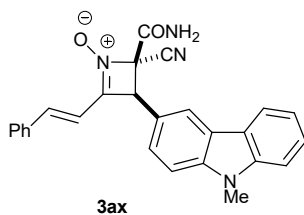

<sup>13</sup>C NMR (125 MHz, CDCl<sub>3</sub>)

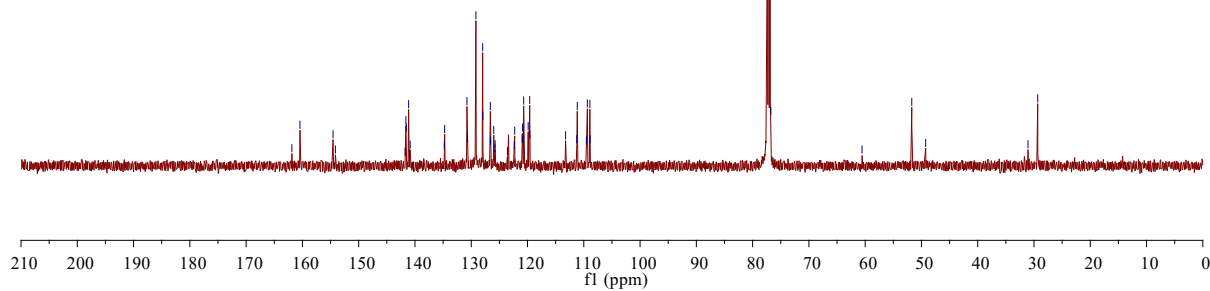

SS-SSR-II-106C

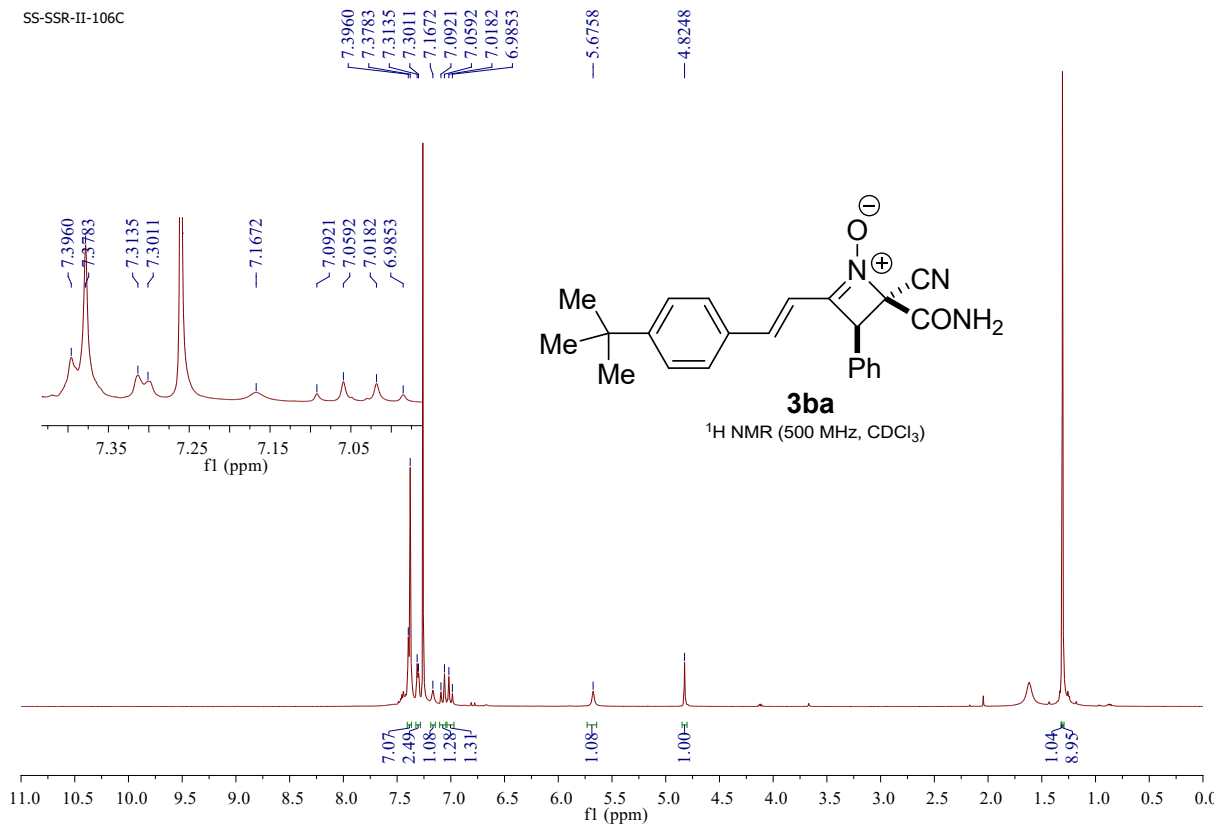

SS-SSR-II-106

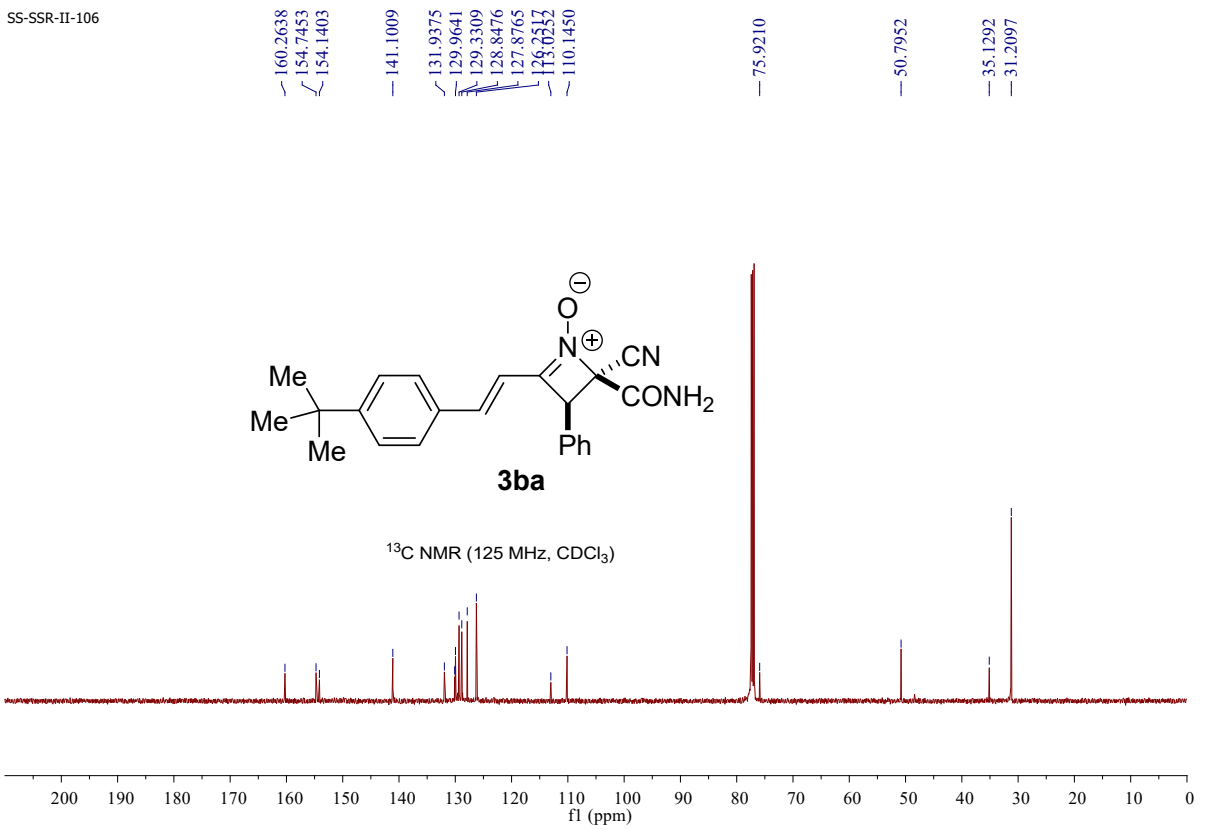

SS-SSR-II-117

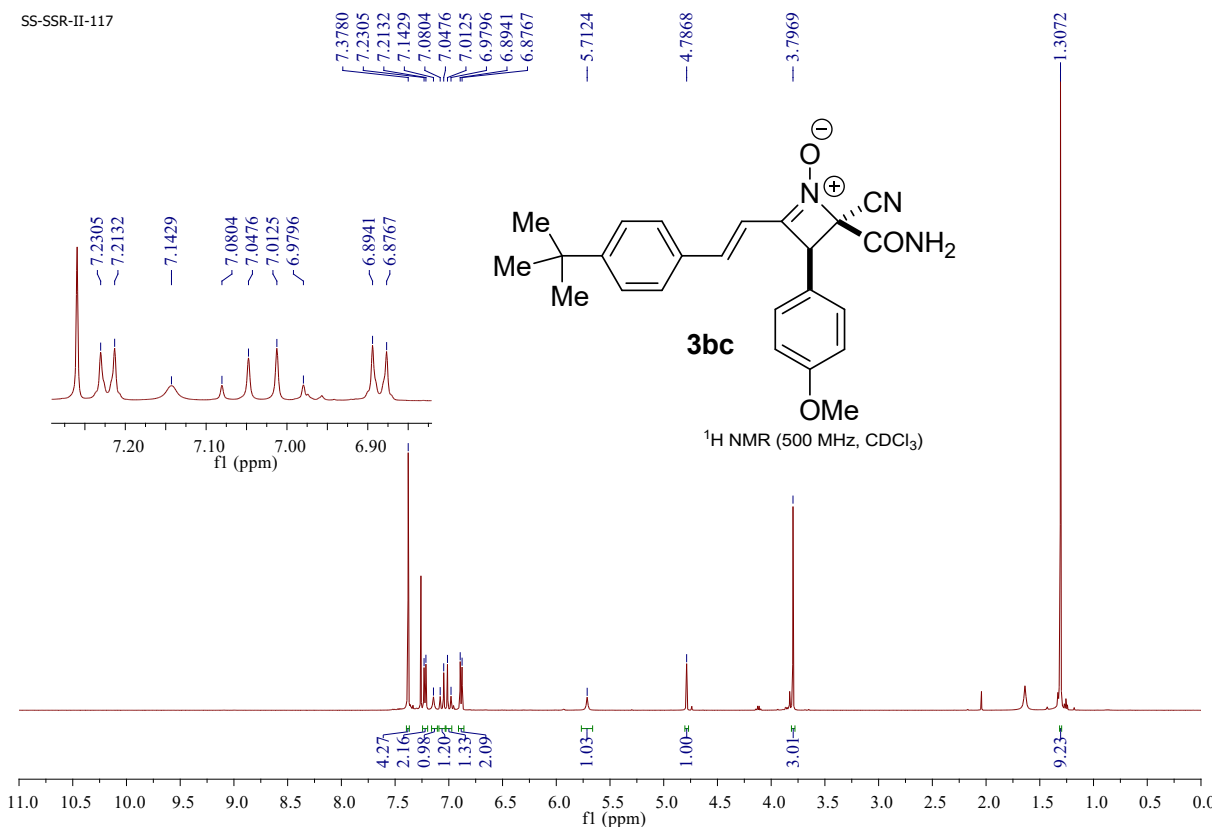

SS-SSR-II-117A

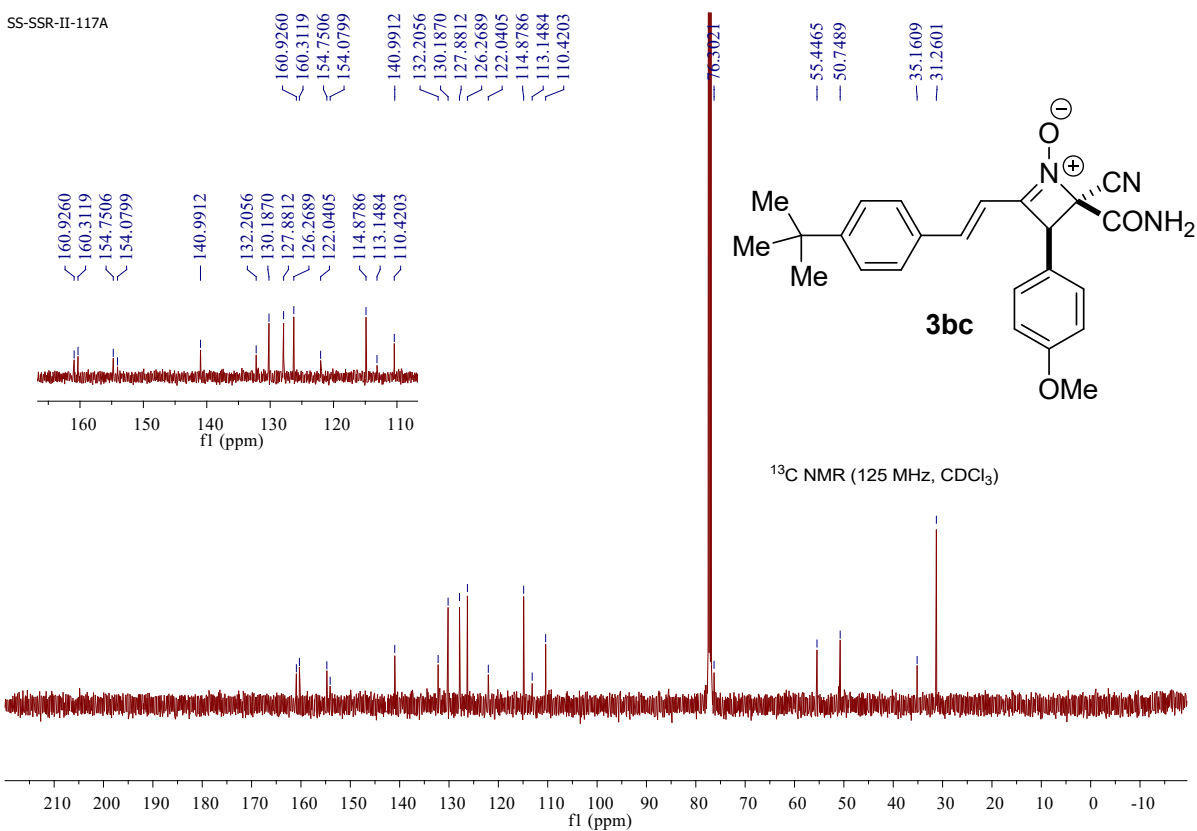

SS-SSR-91

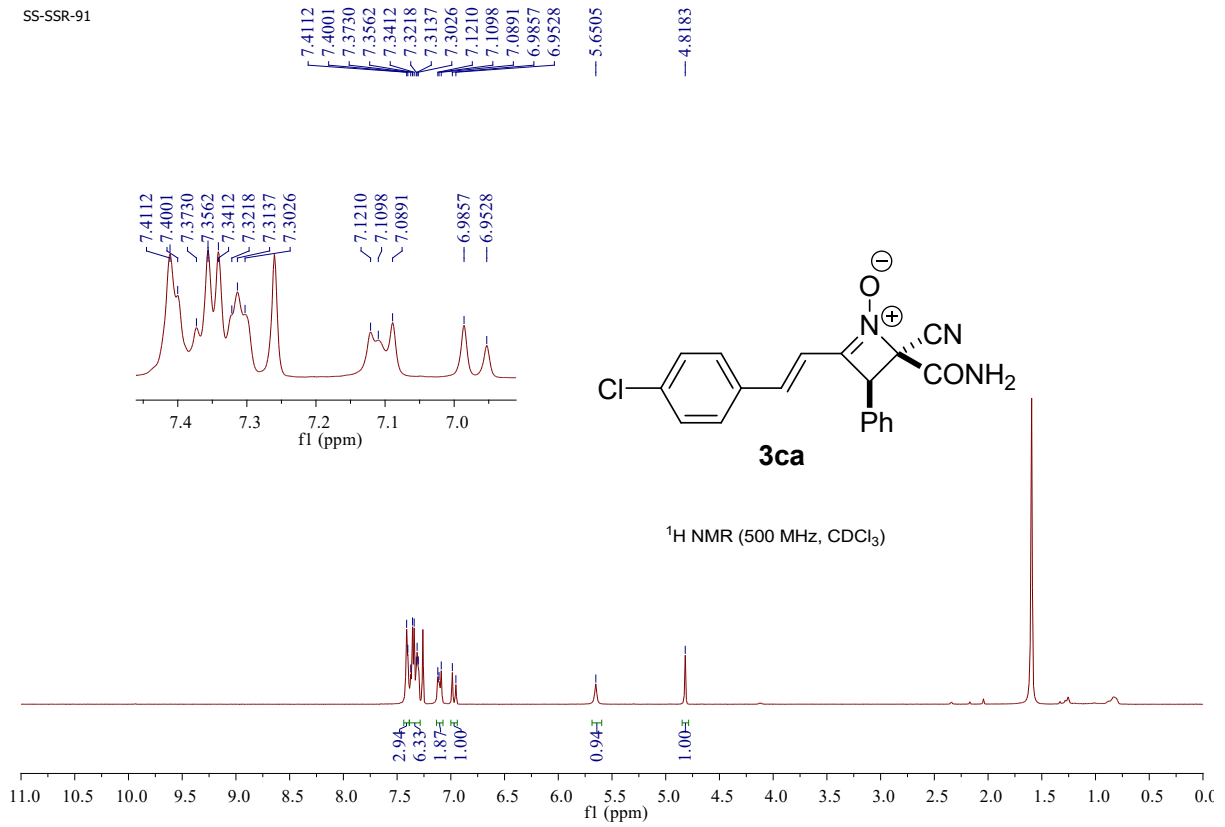

SS-SSR-91

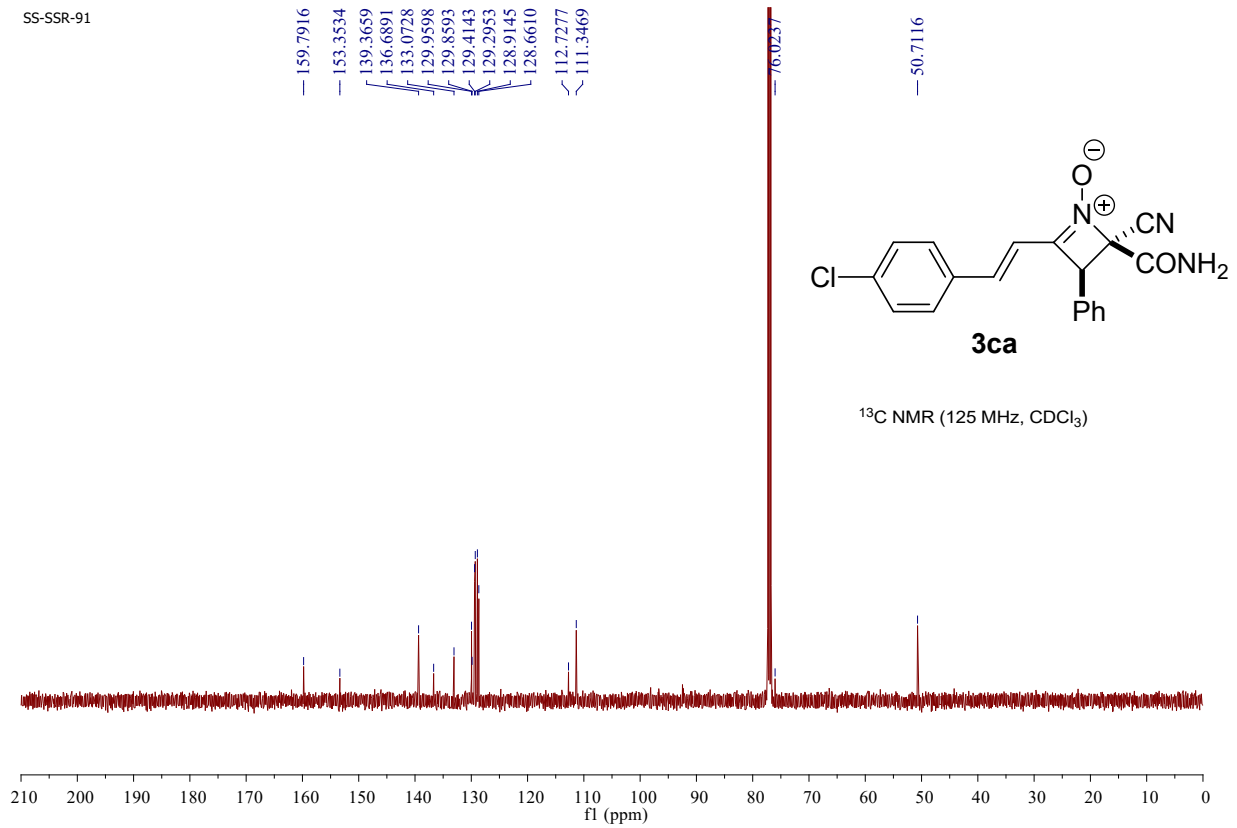

SS-SSR-II-93

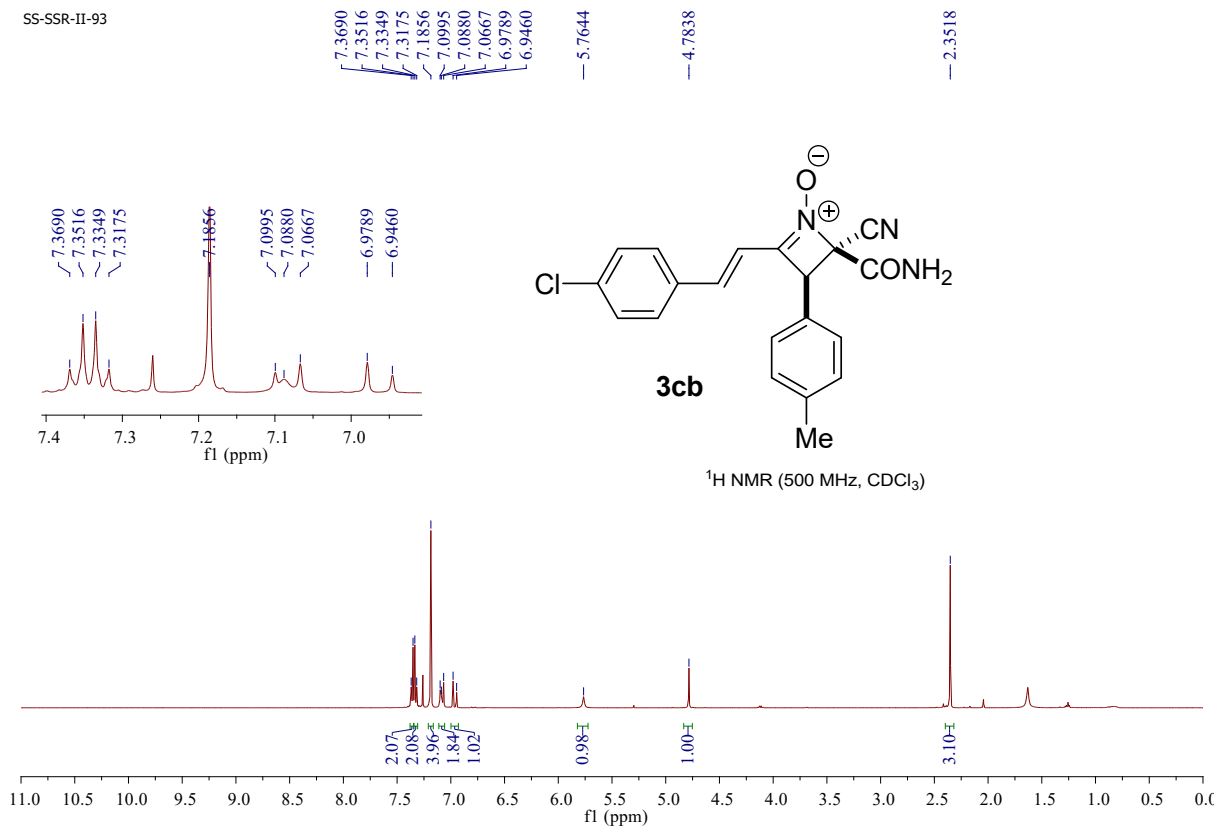

SS-SSR-II-93

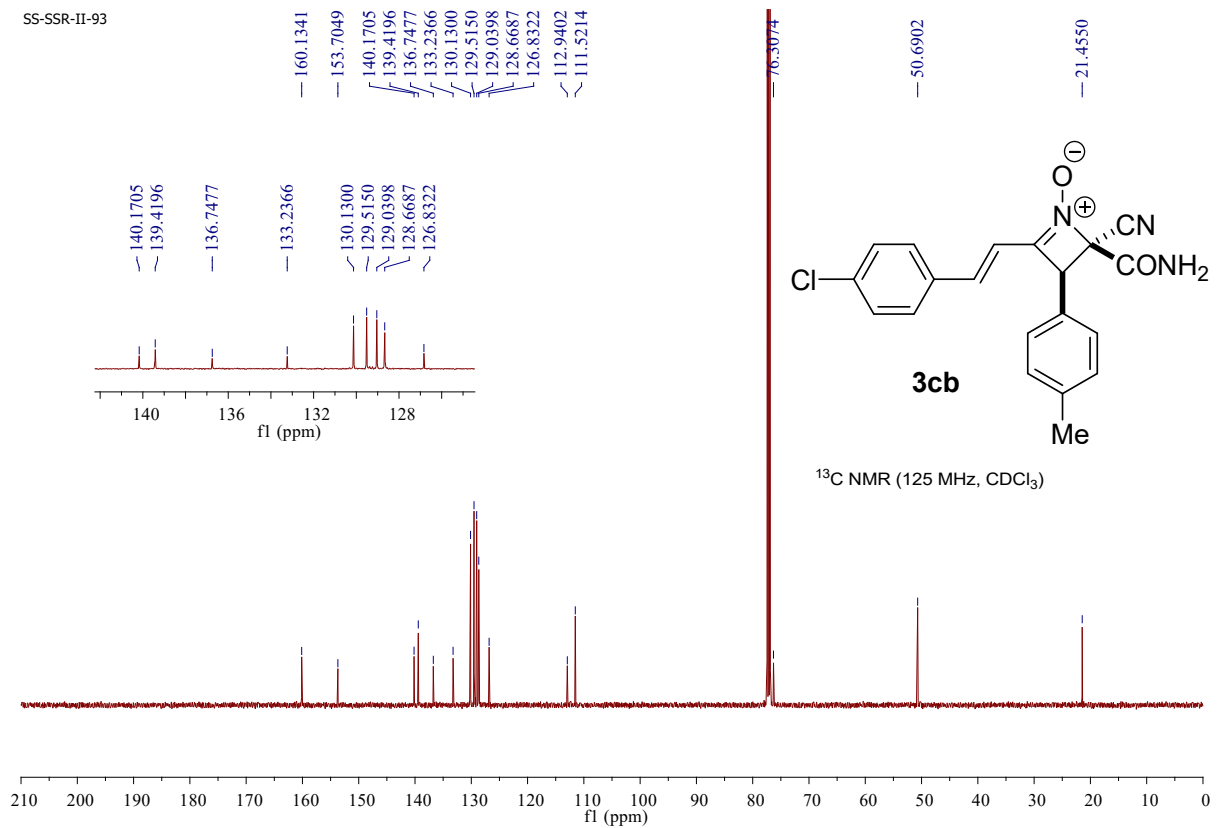

SS-SSR-II-95A

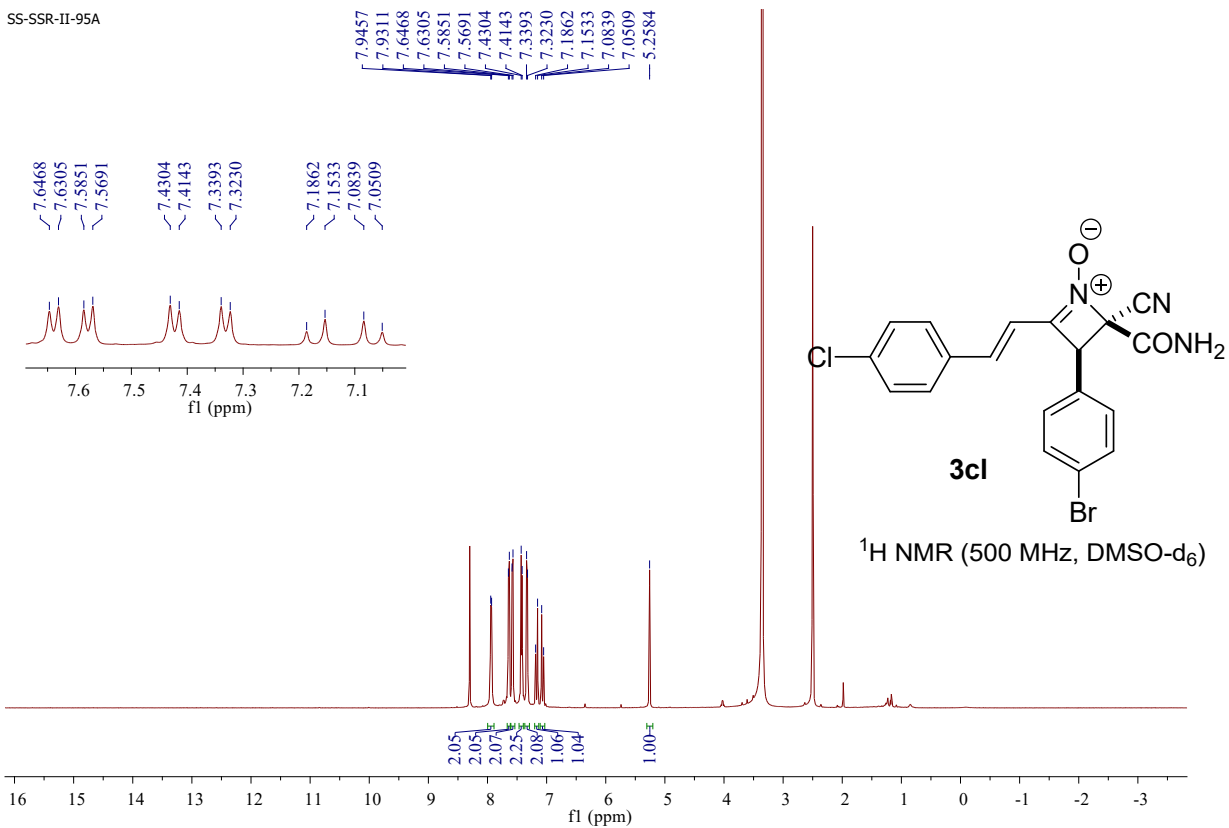

SS-SSR-II-95A

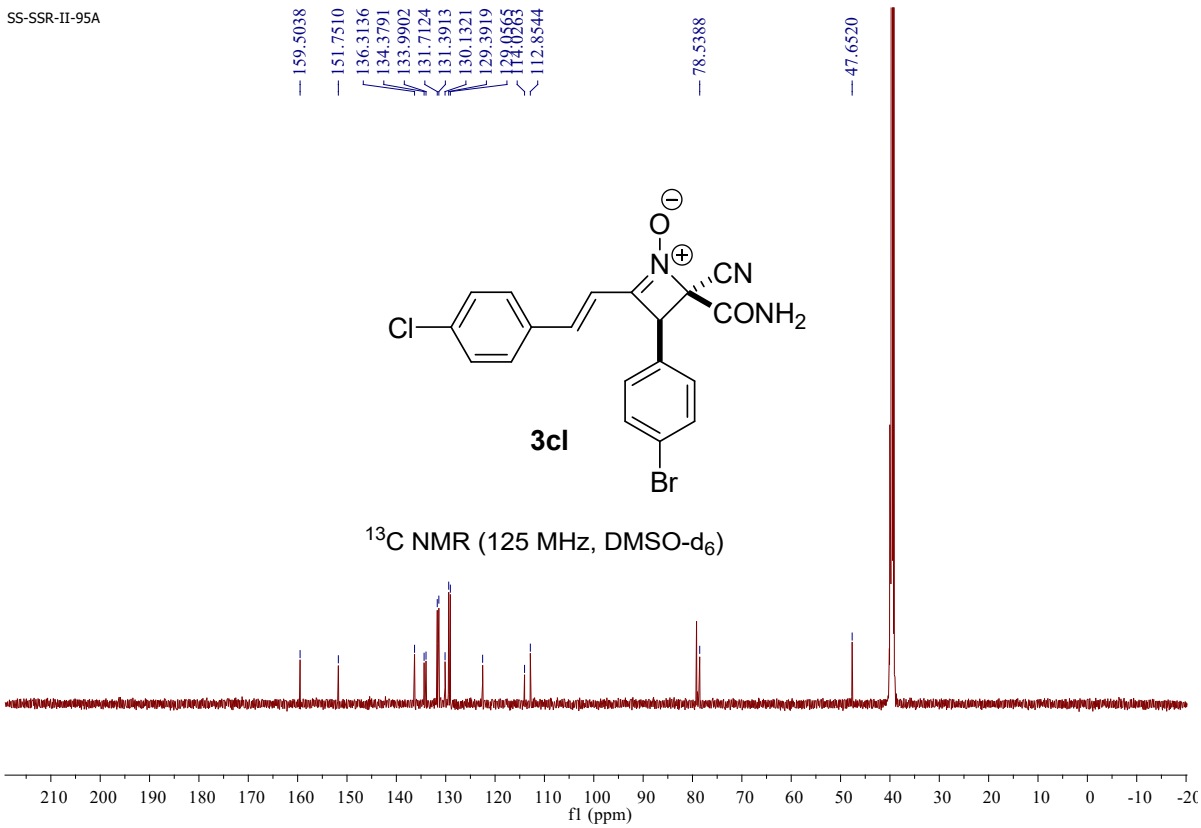

SS-SSR-II-119

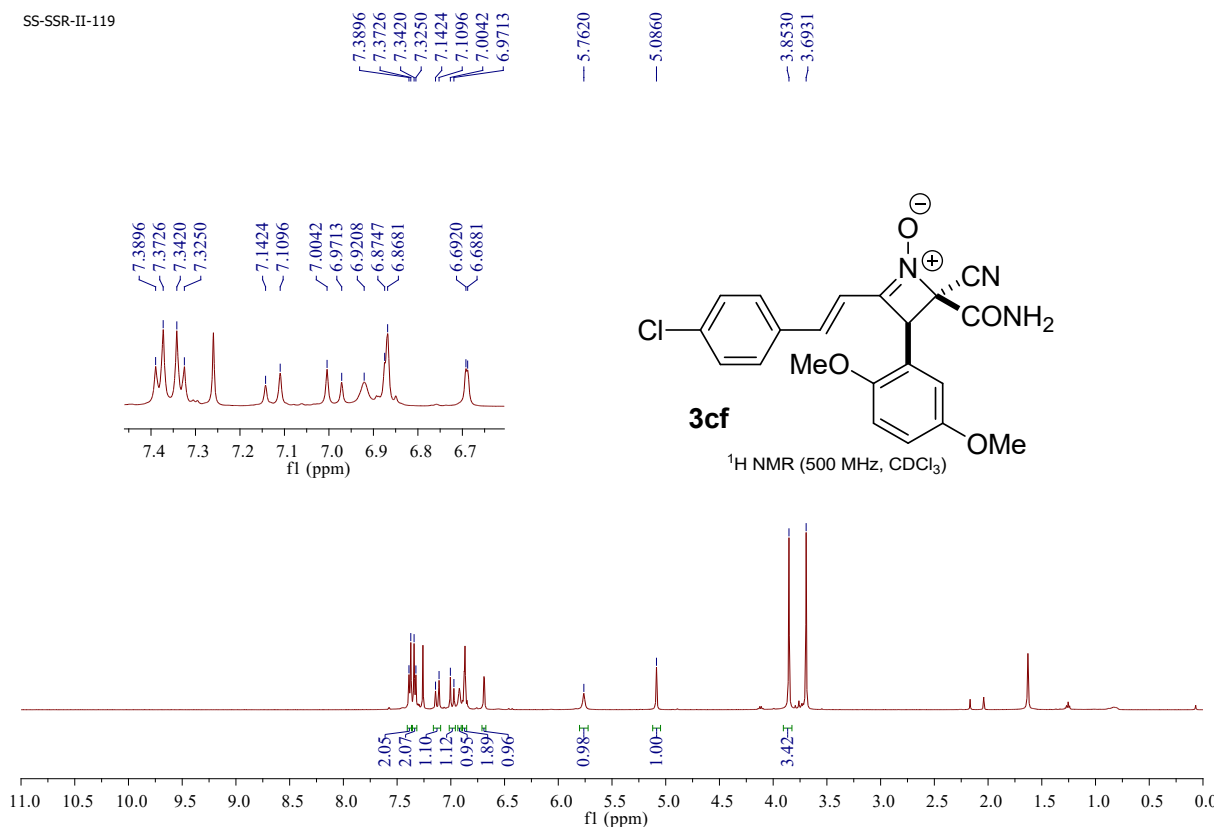

SS-SSR-II-119

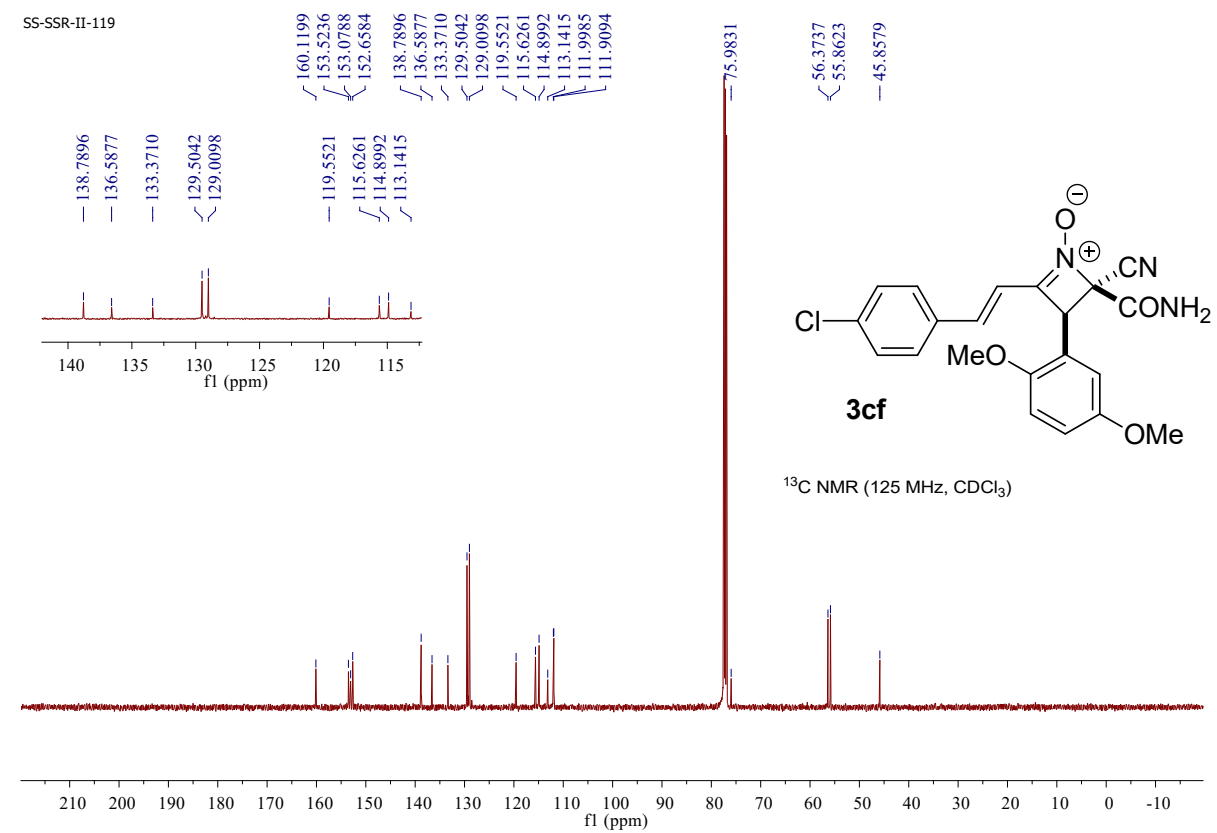

SS-SSR-II-250L-E

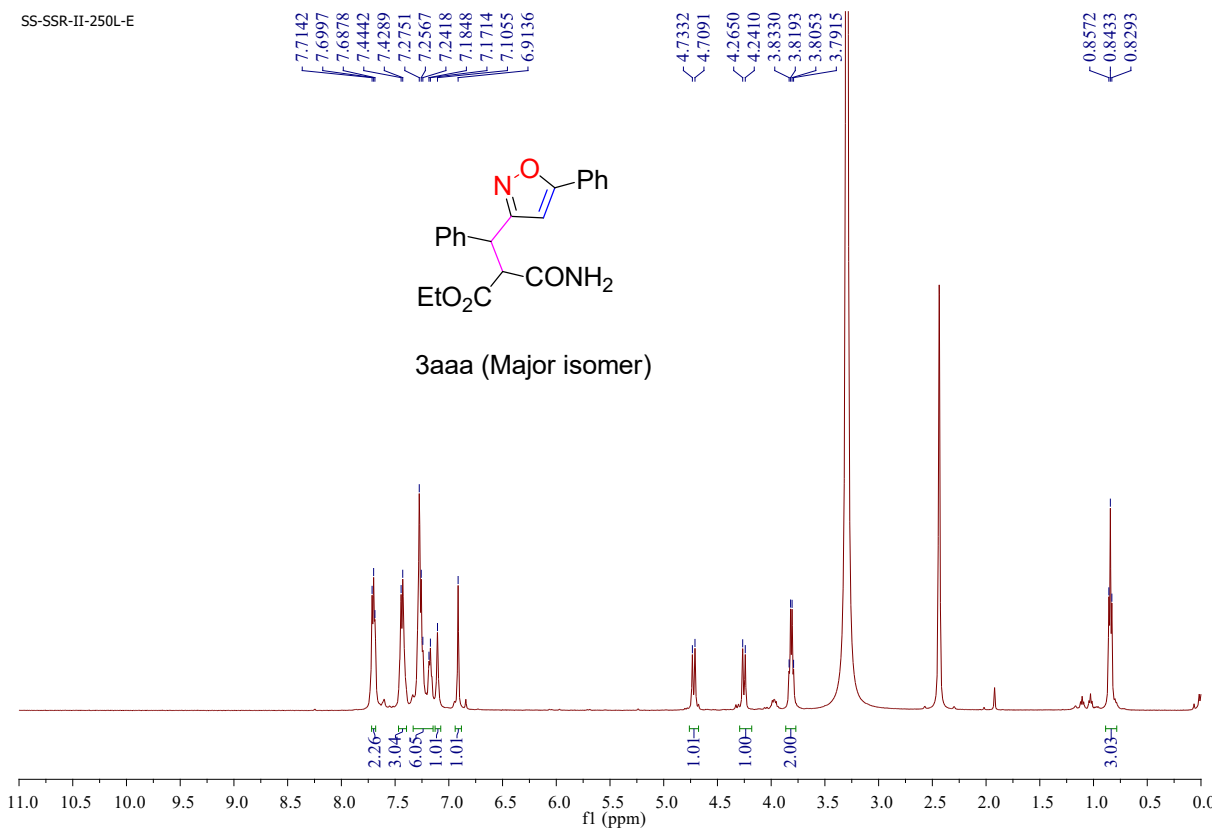

SS-SSR-II-250L-E

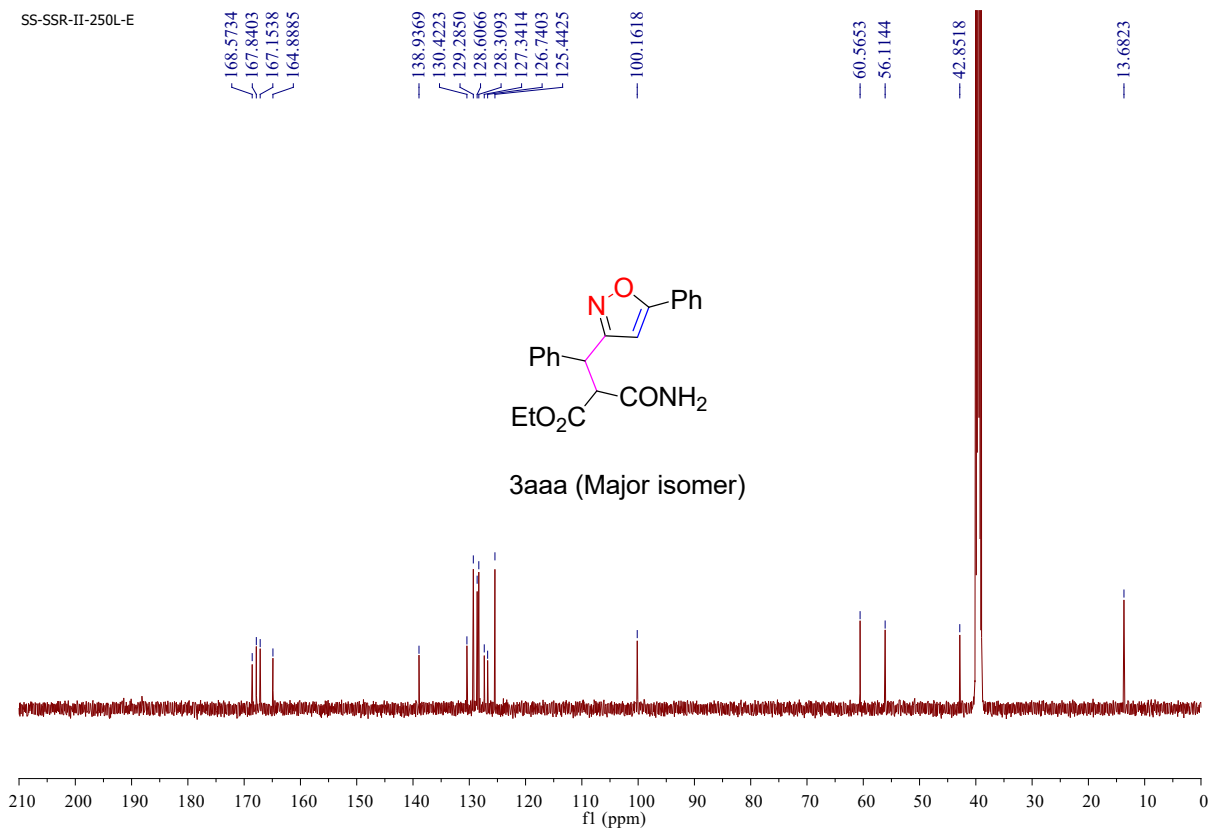



SS-SSR-II-250L-C

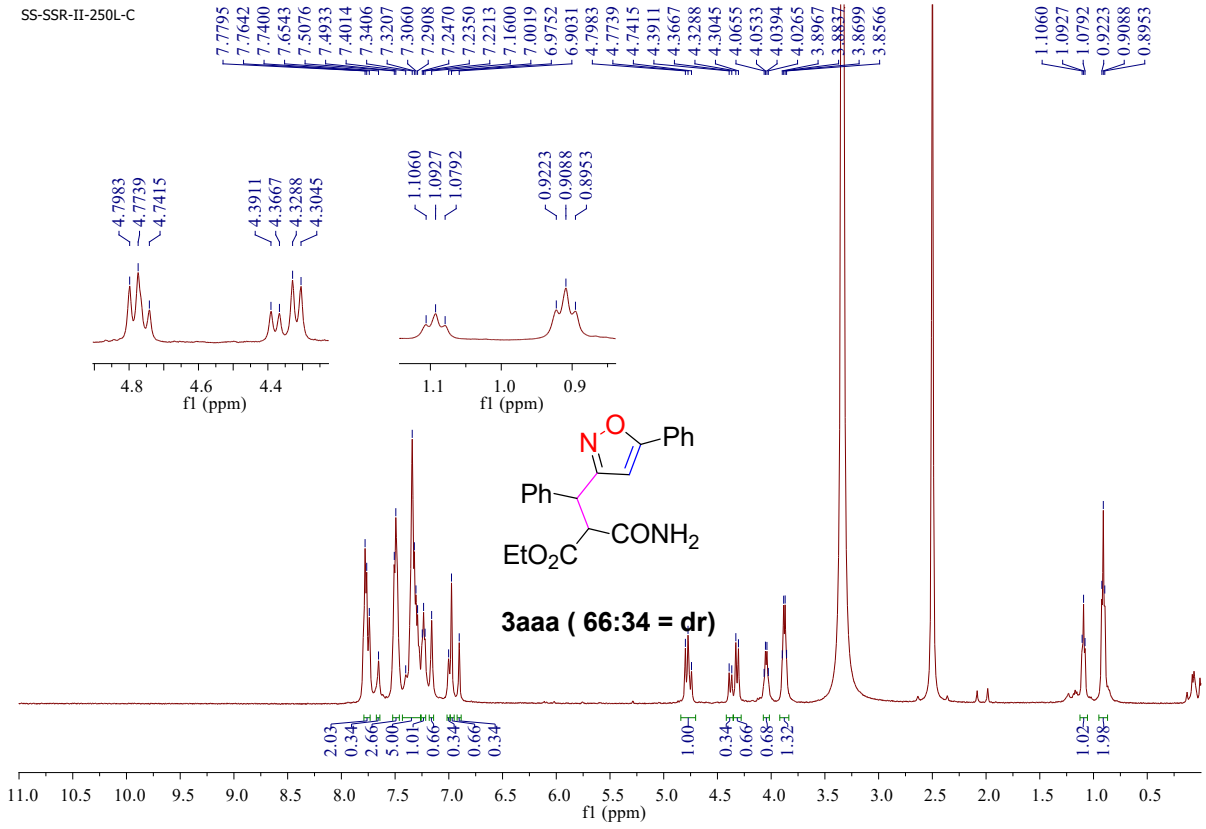

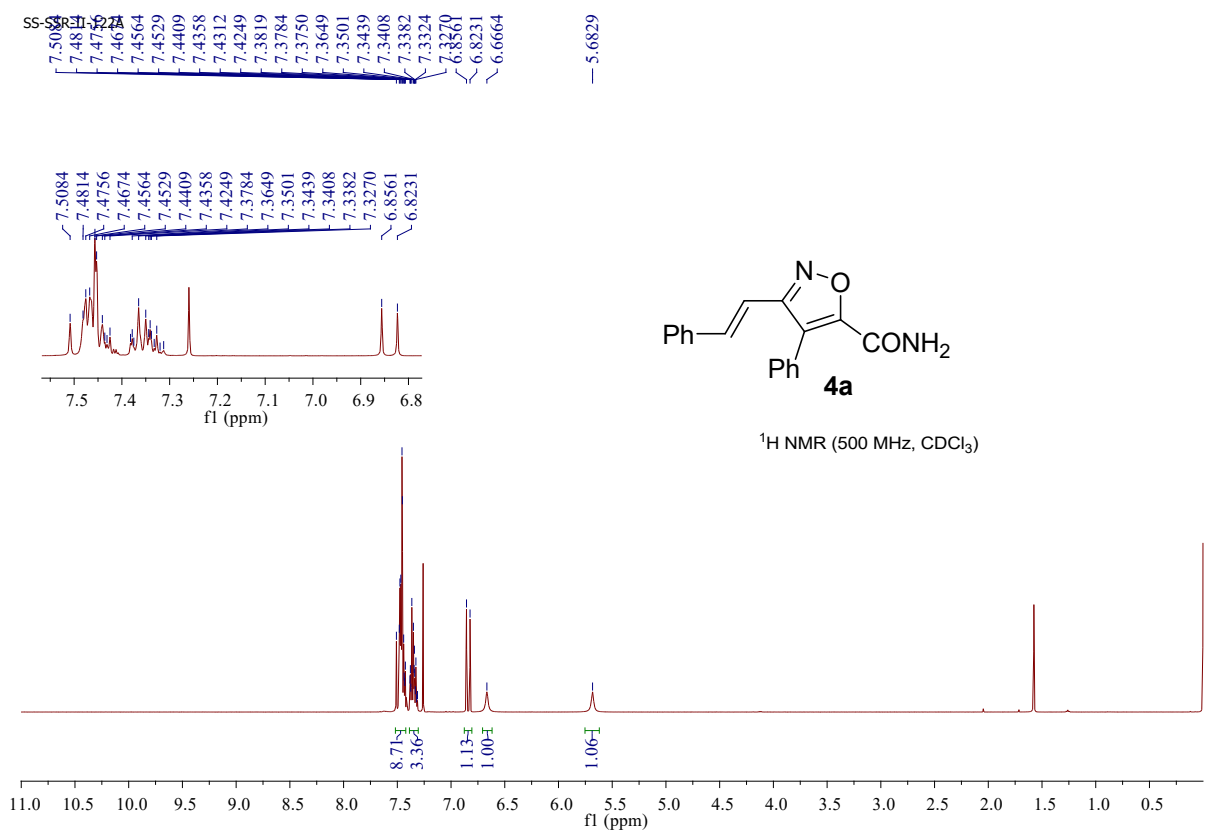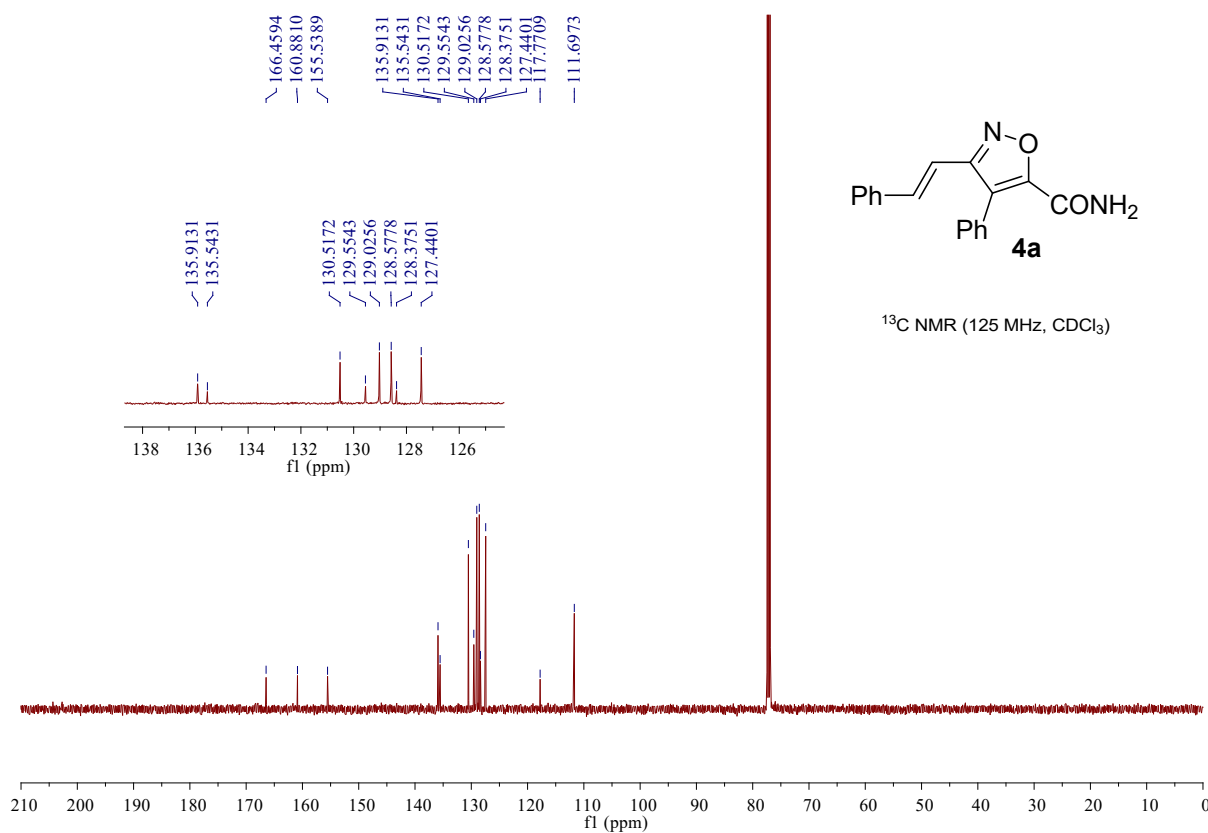

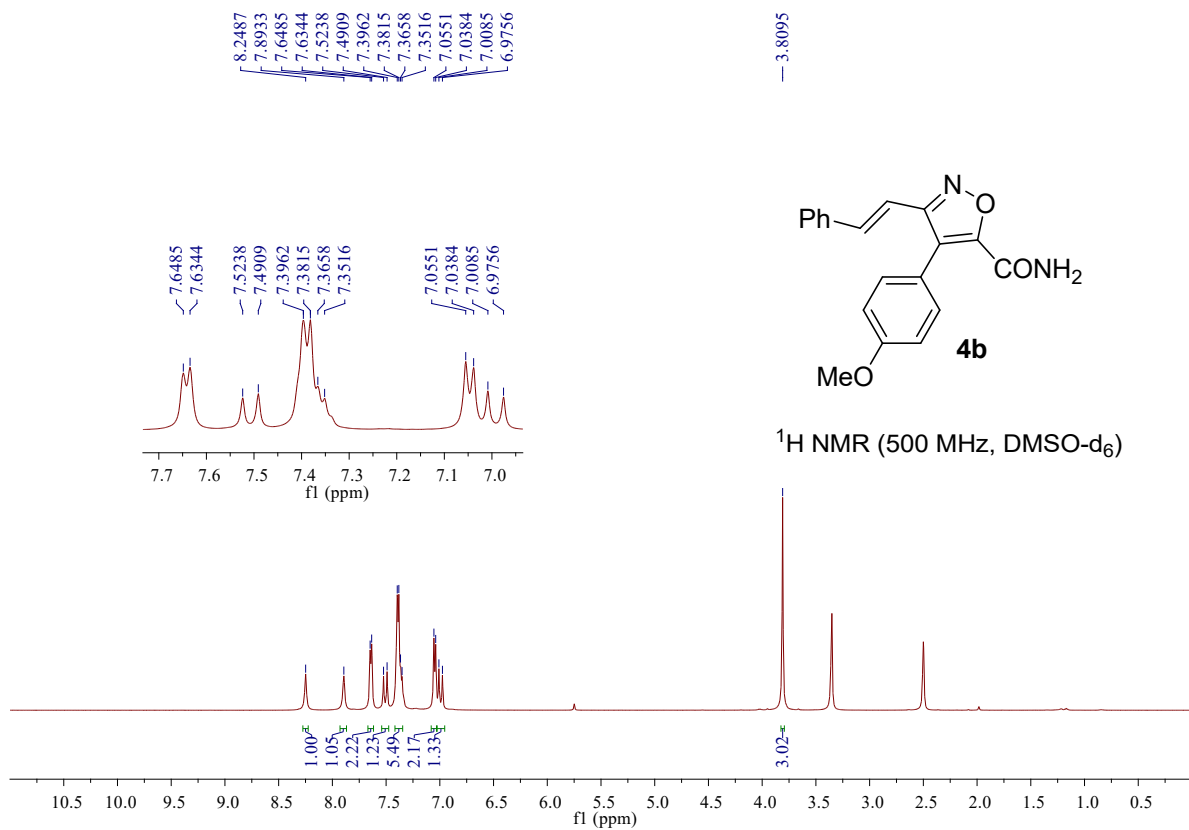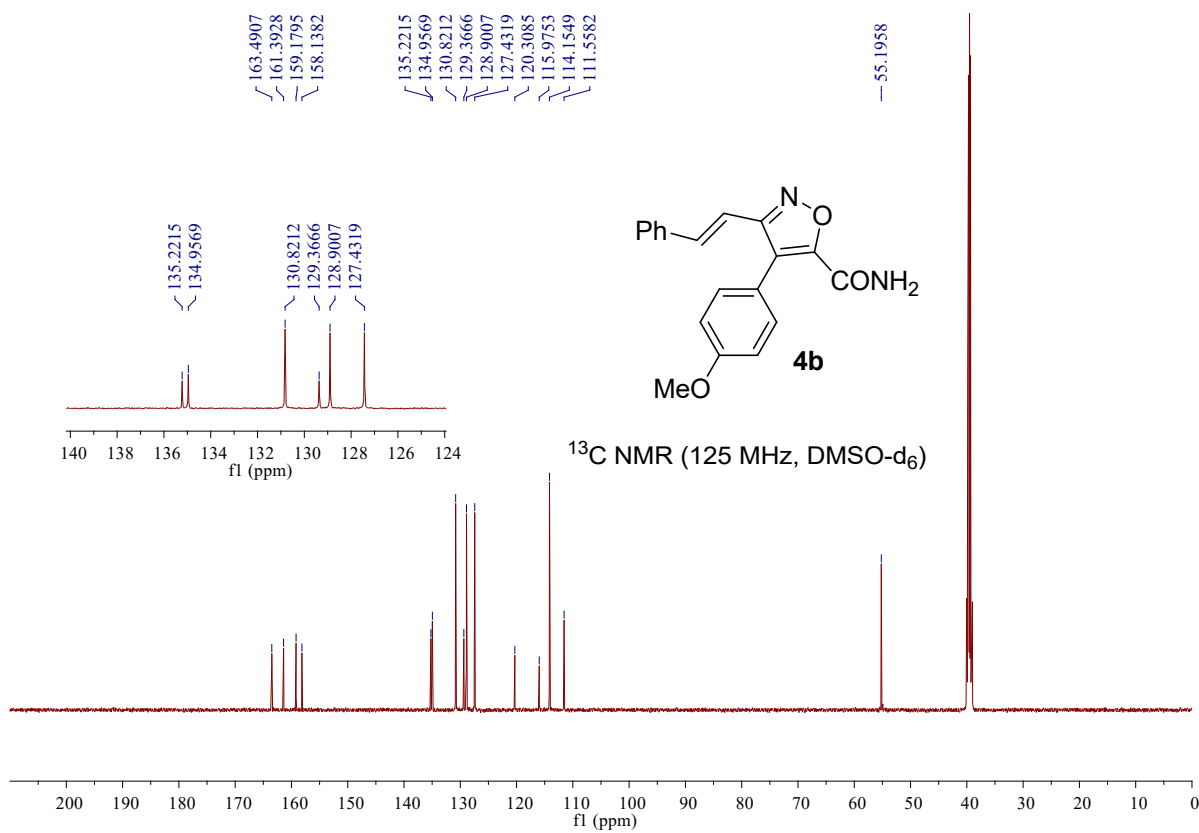

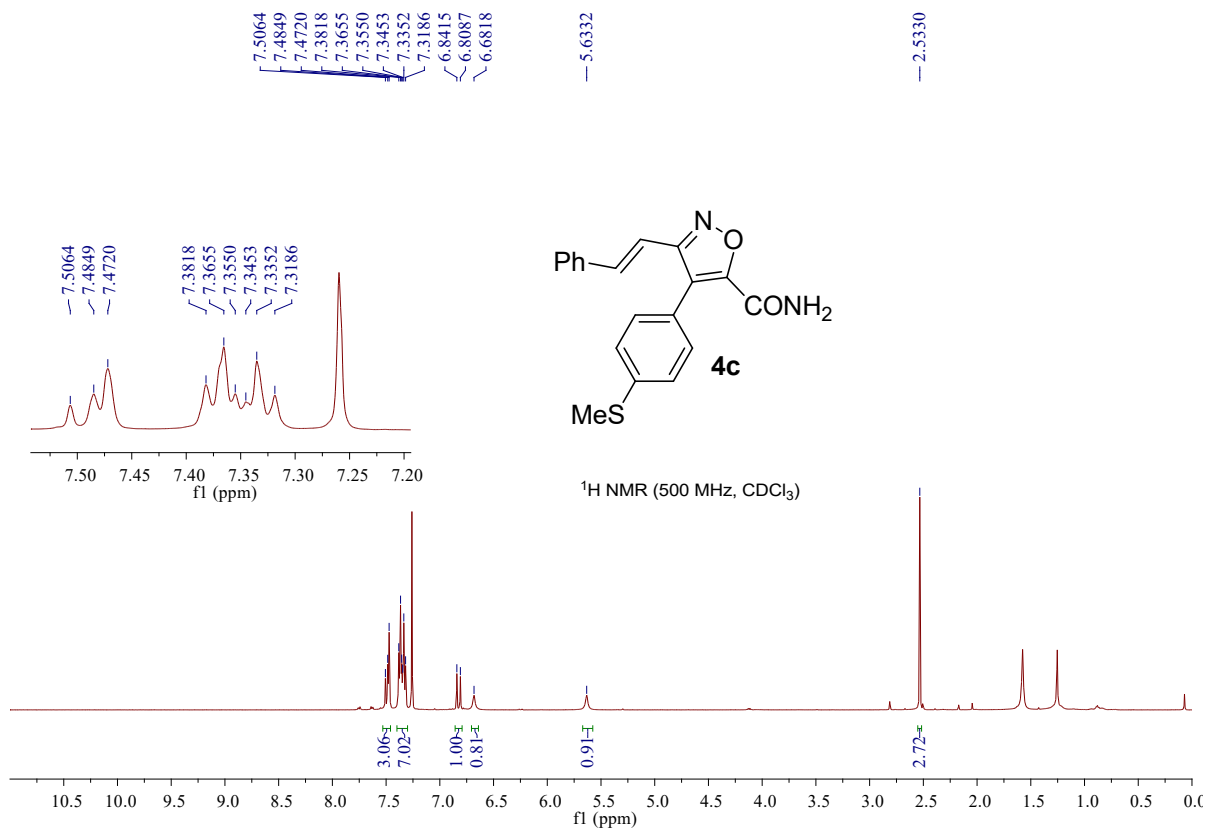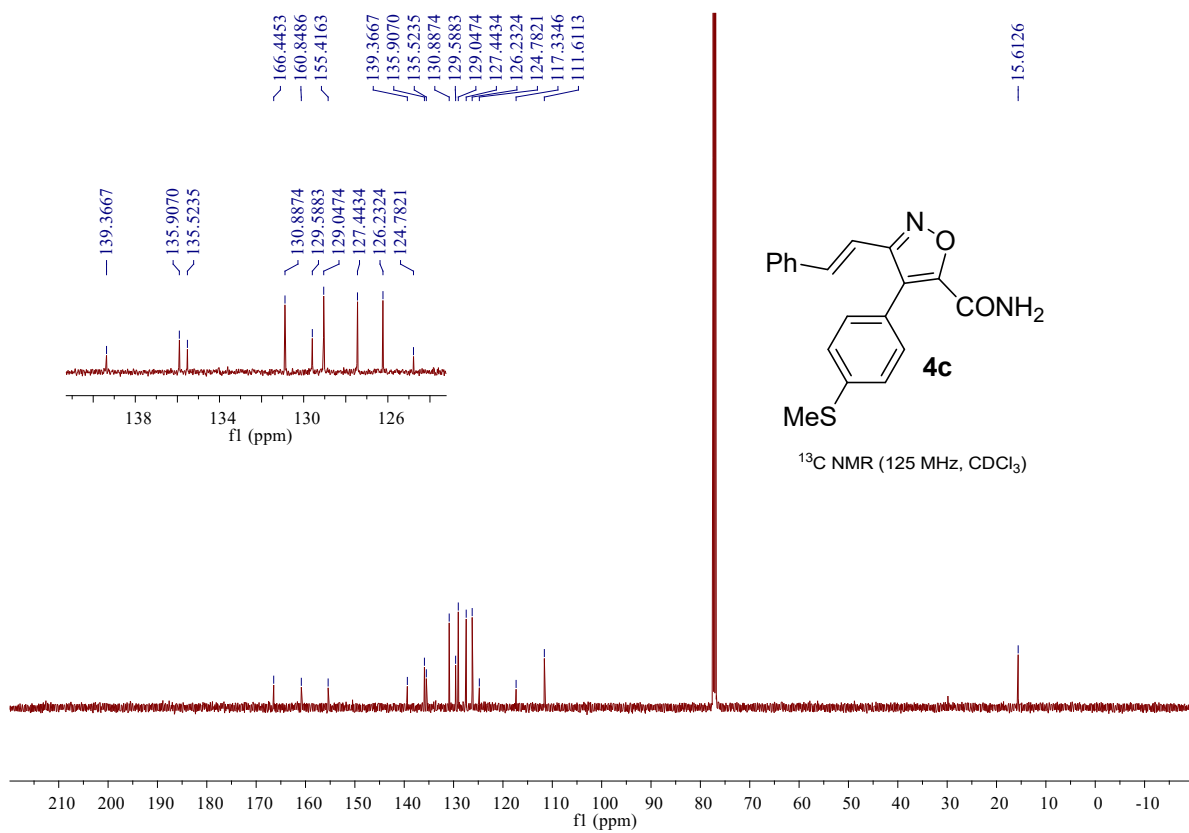

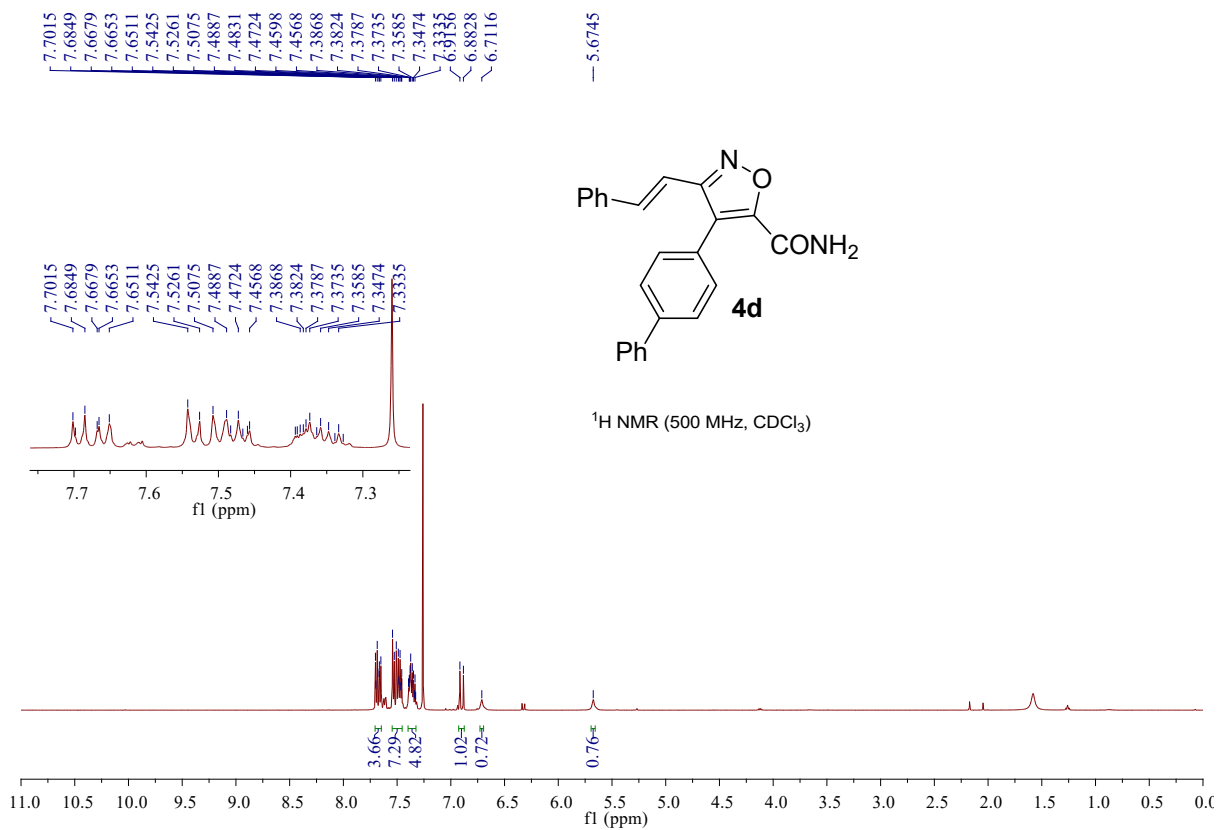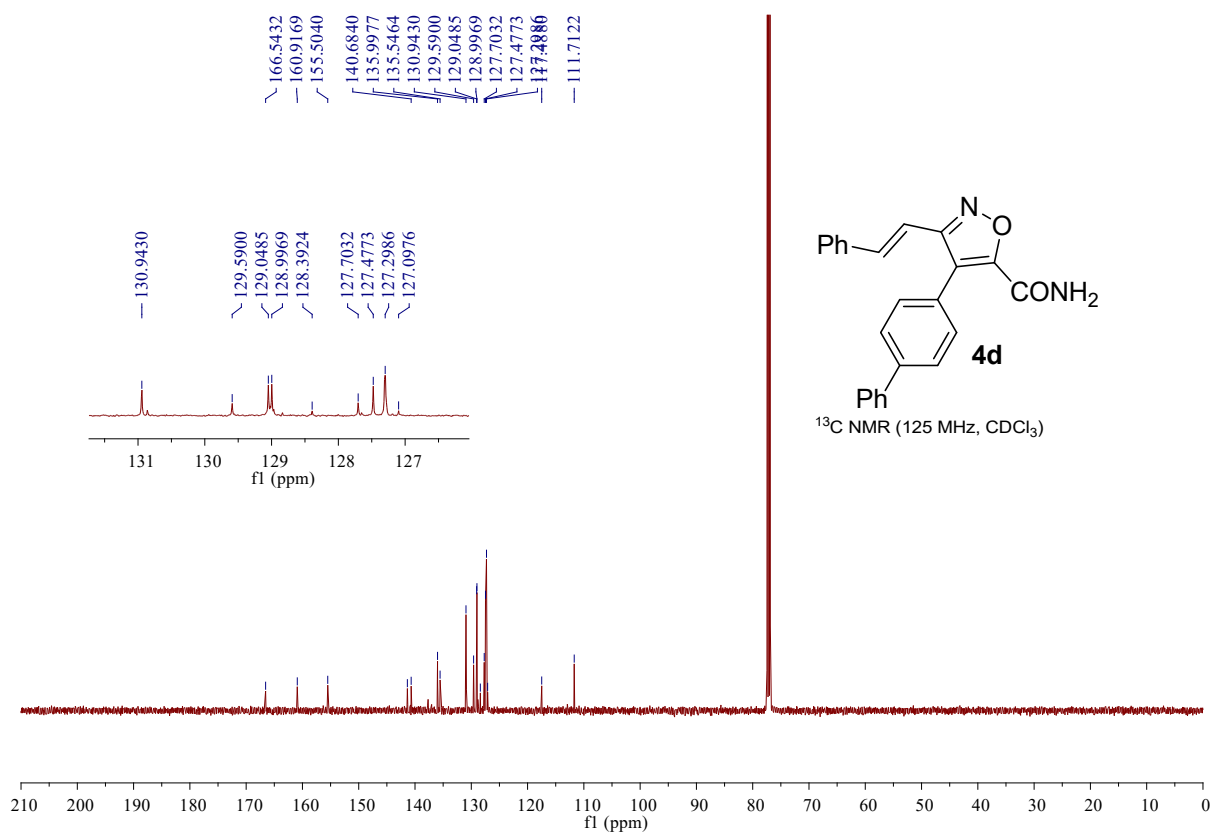

8.2701  
7.9138  
7.6607  
7.6466  
7.5406  
7.5143  
7.5078  
7.4968  
7.5035  
7.4902  
7.4902  
7.4859  
7.4083  
7.4053  
7.3918  
7.3768  
7.3663  
7.3576  
7.3525  
7.3458  
7.3375  
7.3312  
7.3270  
7.3133  
7.2997  
7.2956  
7.2898  
7.0090  
6.9761

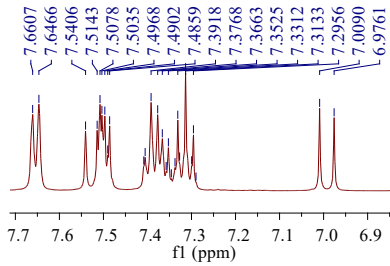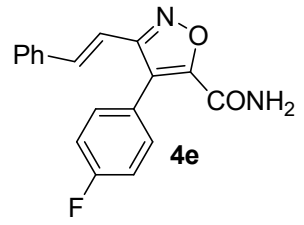

<sup>1</sup>H NMR (500 MHz, DMSO-d<sub>6</sub>)

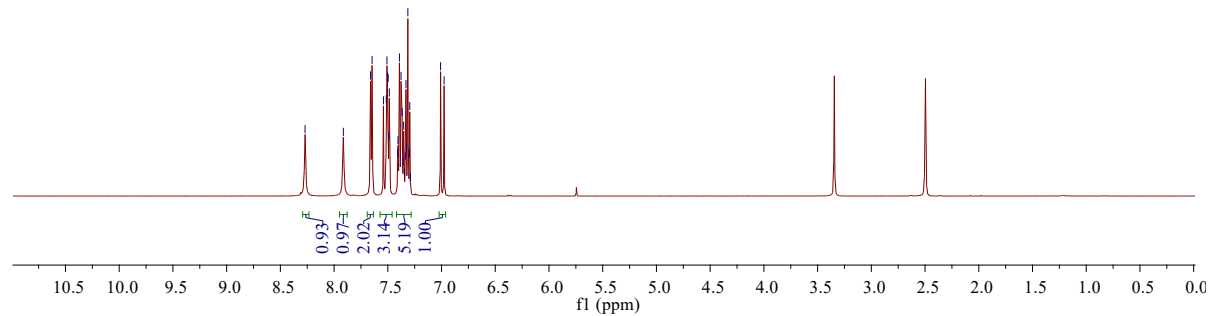

164.1464  
162.9698  
161.0912  
161.0189  
157.8389  
135.5345  
135.1104  
131.8508  
131.7839  
129.4798  
128.8805  
127.5474  
124.6727  
124.6471  
115.4725  
115.3135  
111.3102

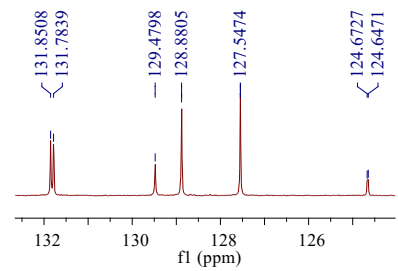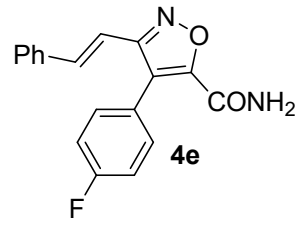

<sup>13</sup>C NMR (125 MHz, DMSO-d<sub>6</sub>)

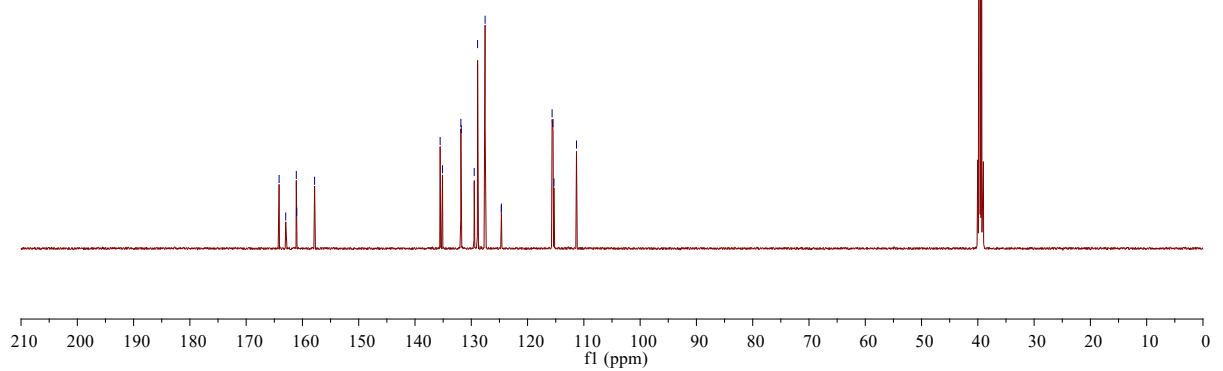

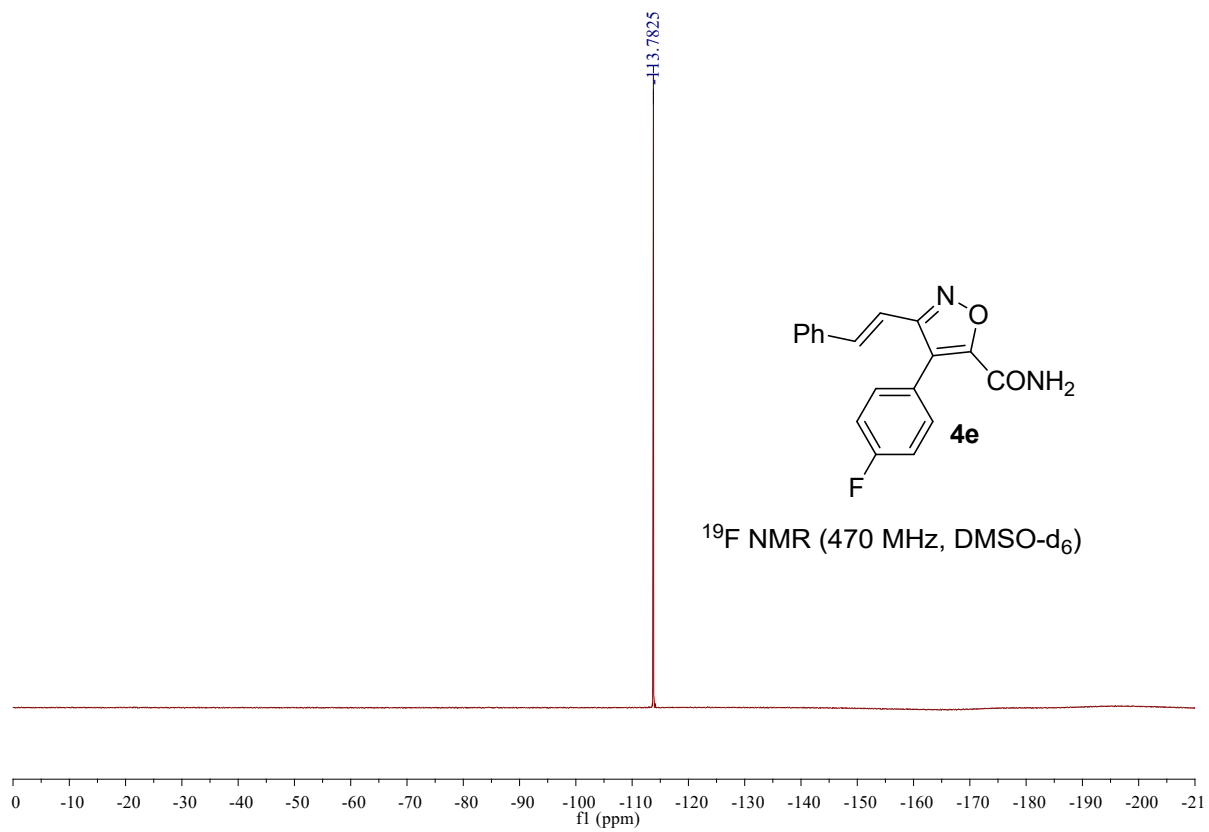

SS-SSR-II-139D

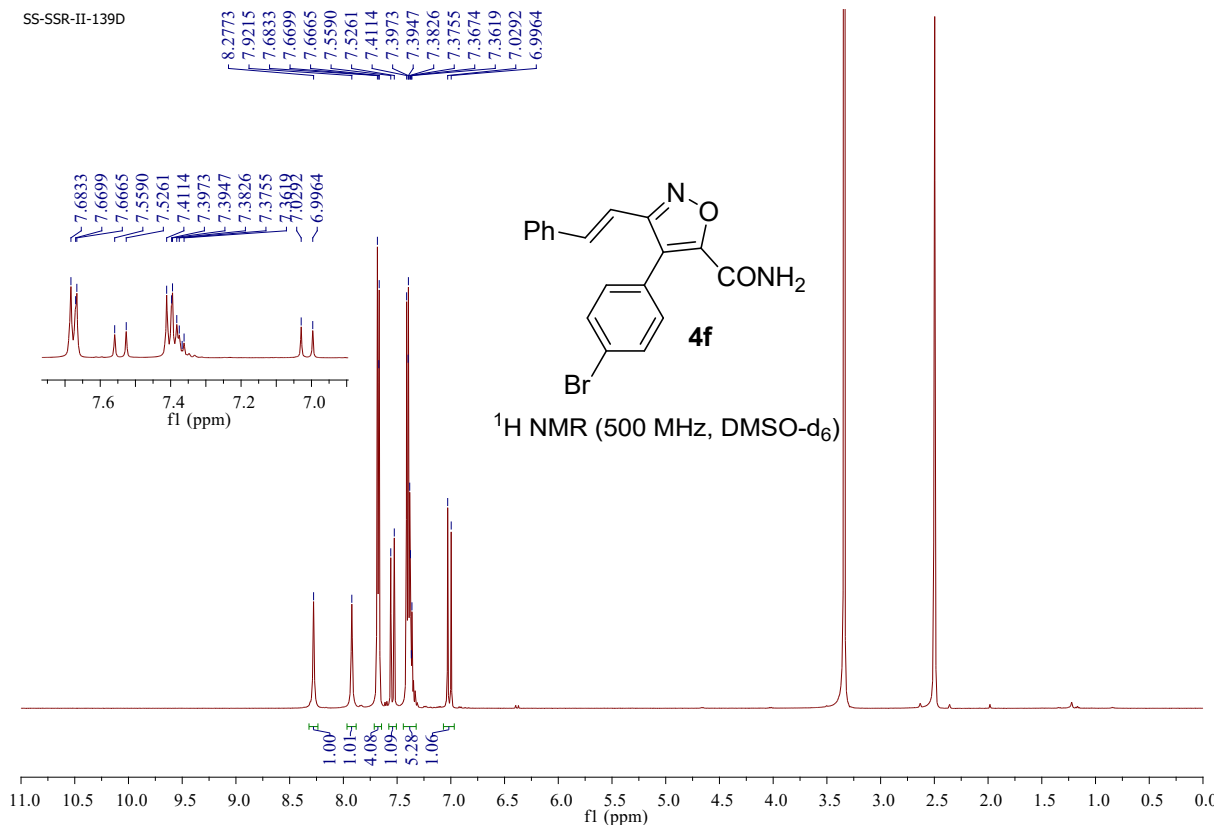

SS-SSR-II-139D

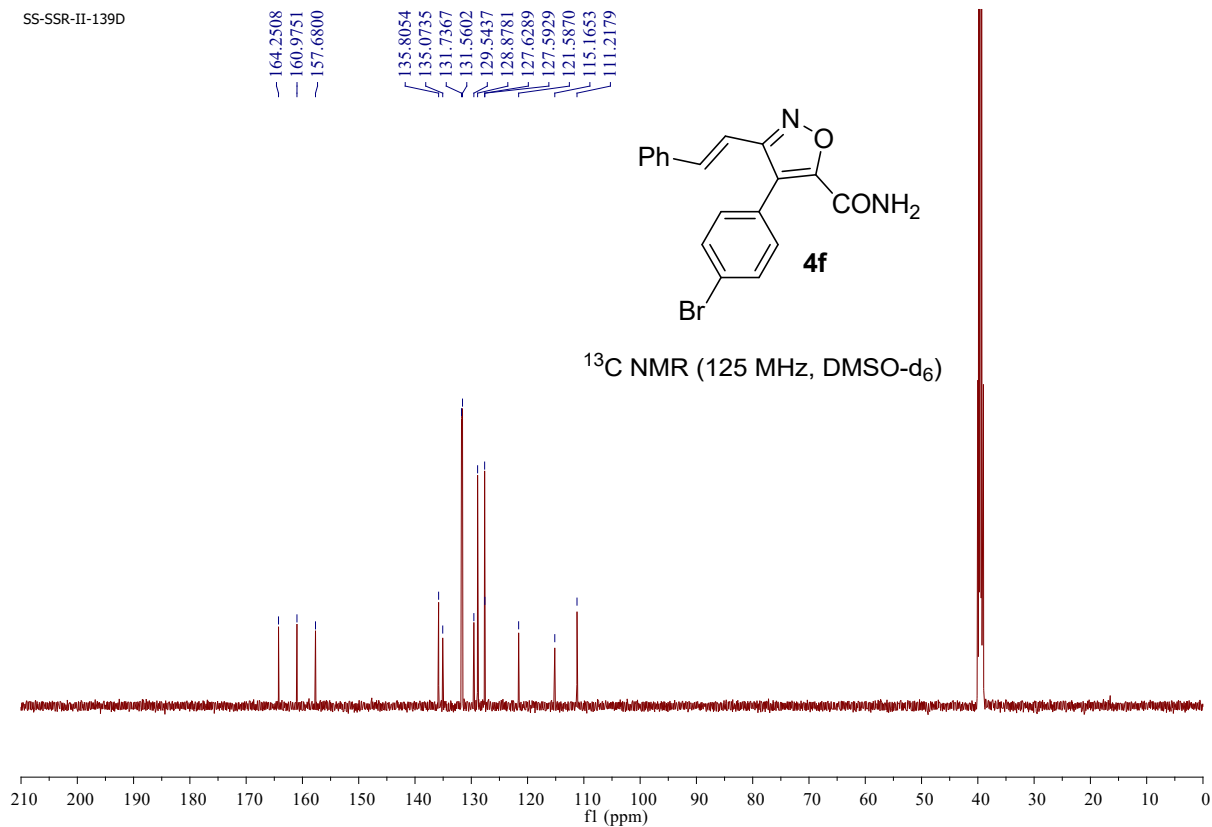



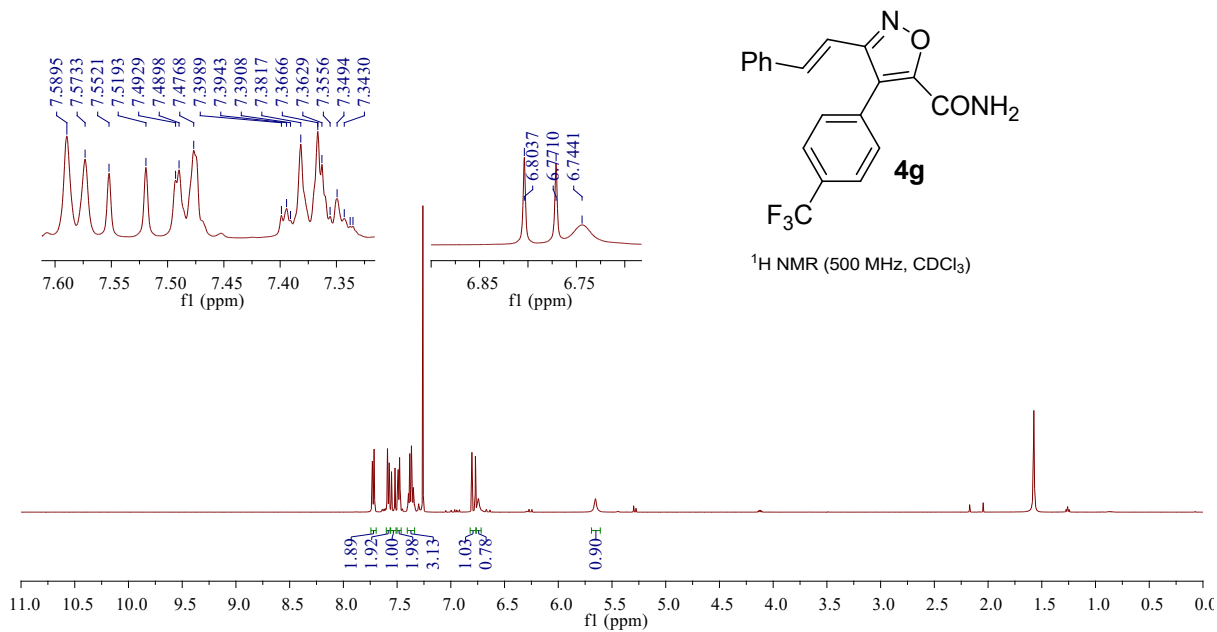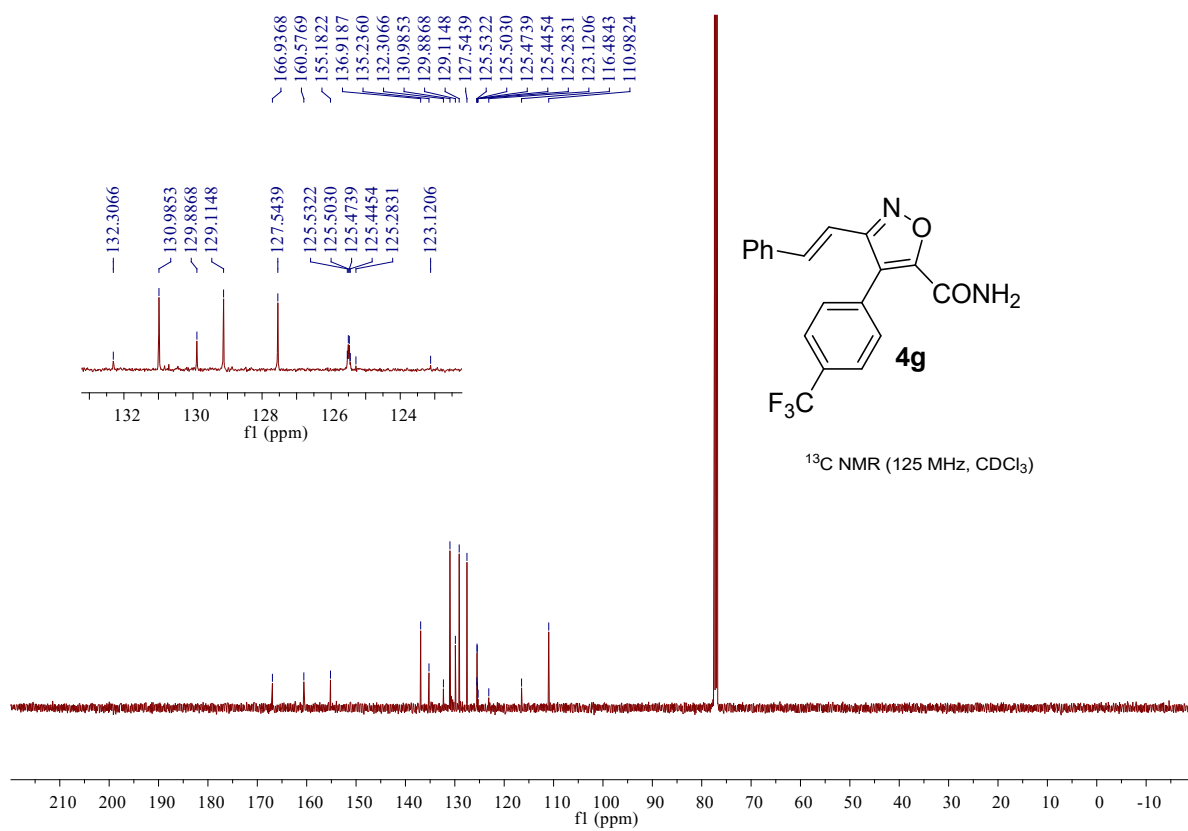

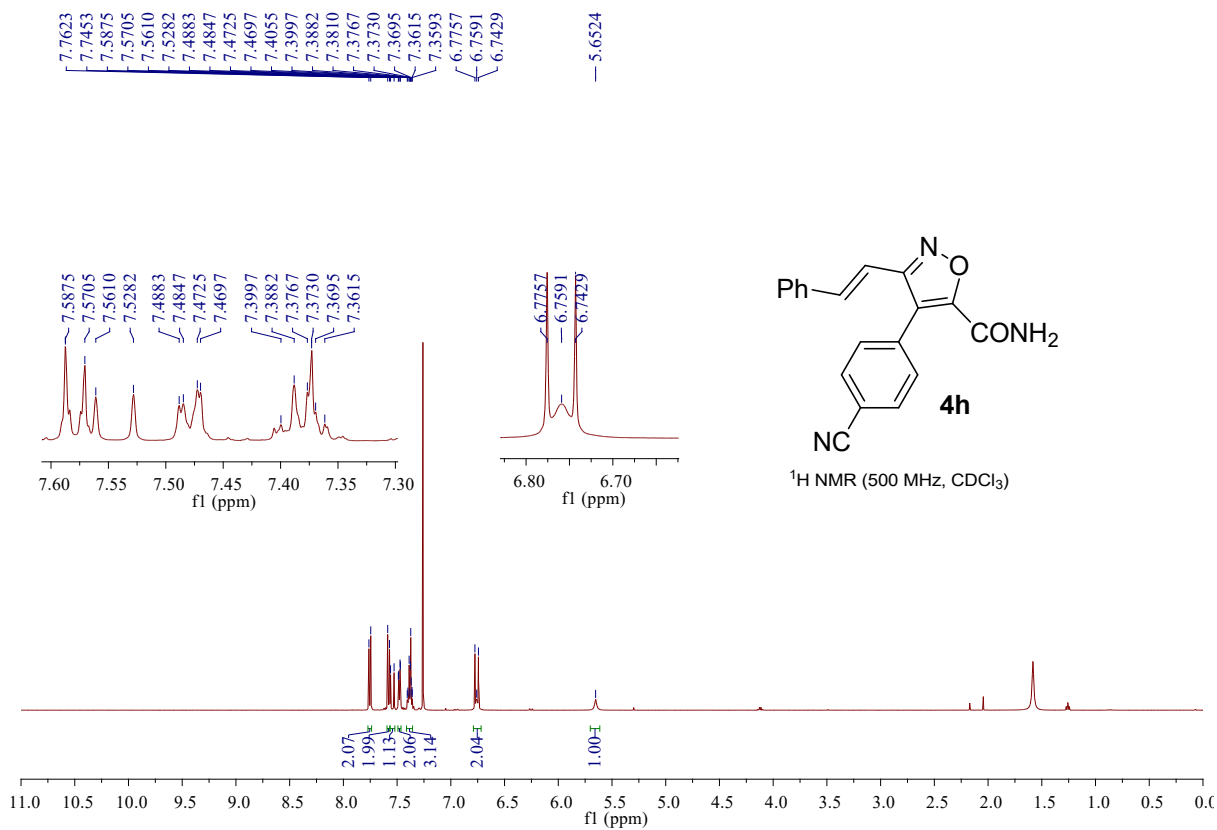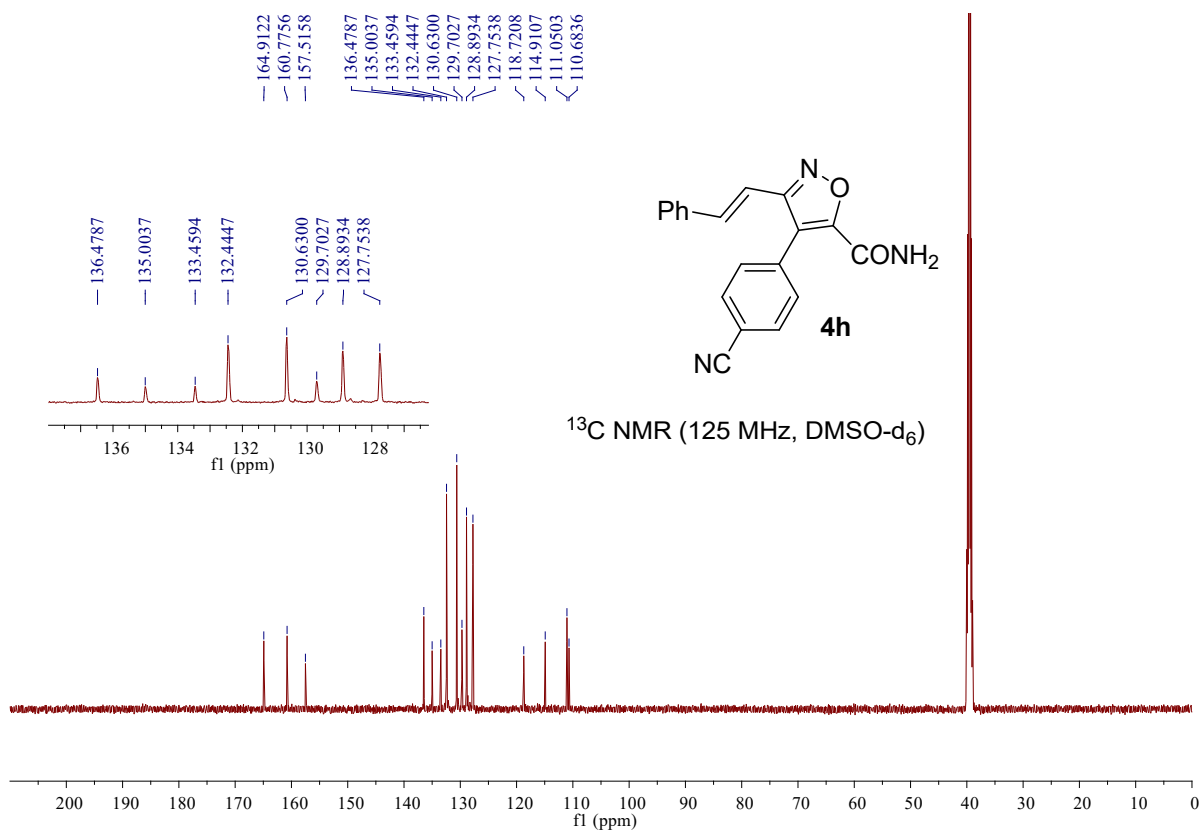

SS-SSR-II-183

PROTONRO DMSO {H:\OneDrive - IIT Indore\Sampak} NMR-400 46

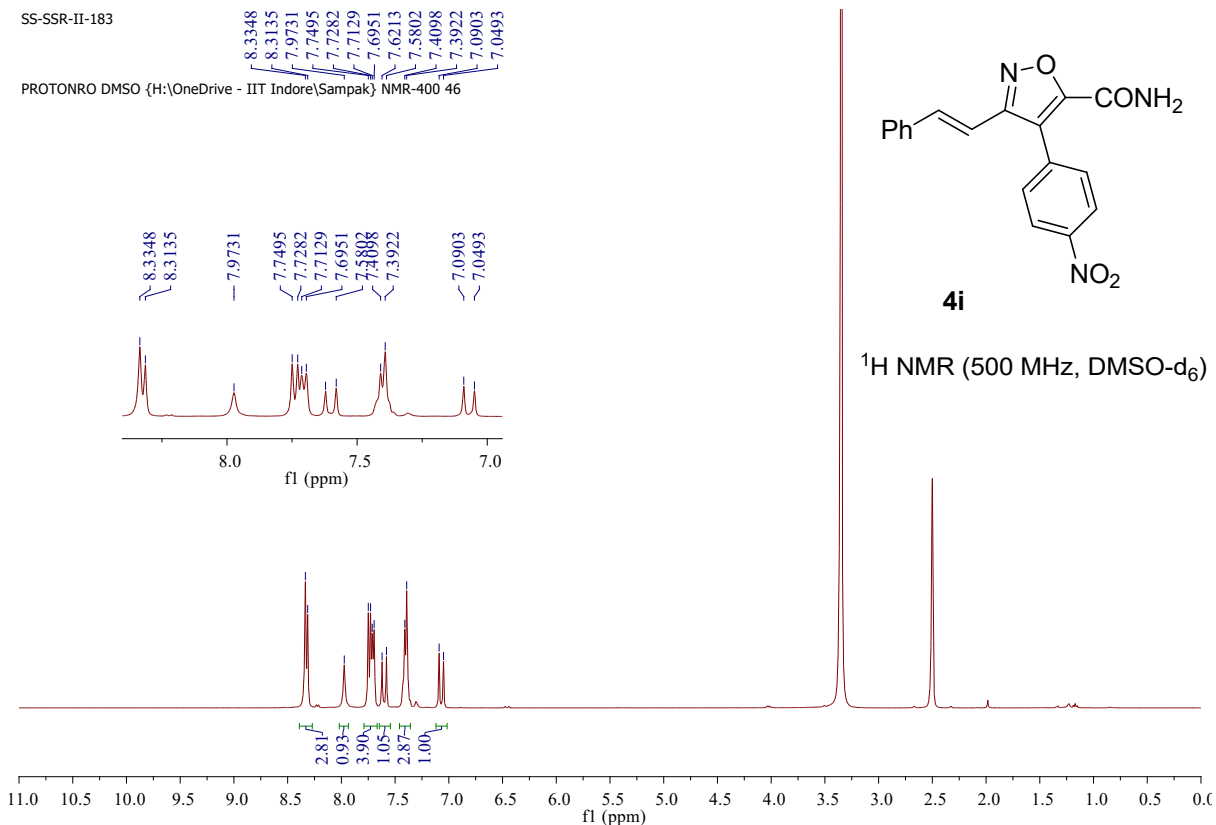

SS-SSR-II-183

C13CPD DMSO {H:\OneDrive - IIT Indore\Sampak} NMR-400 46

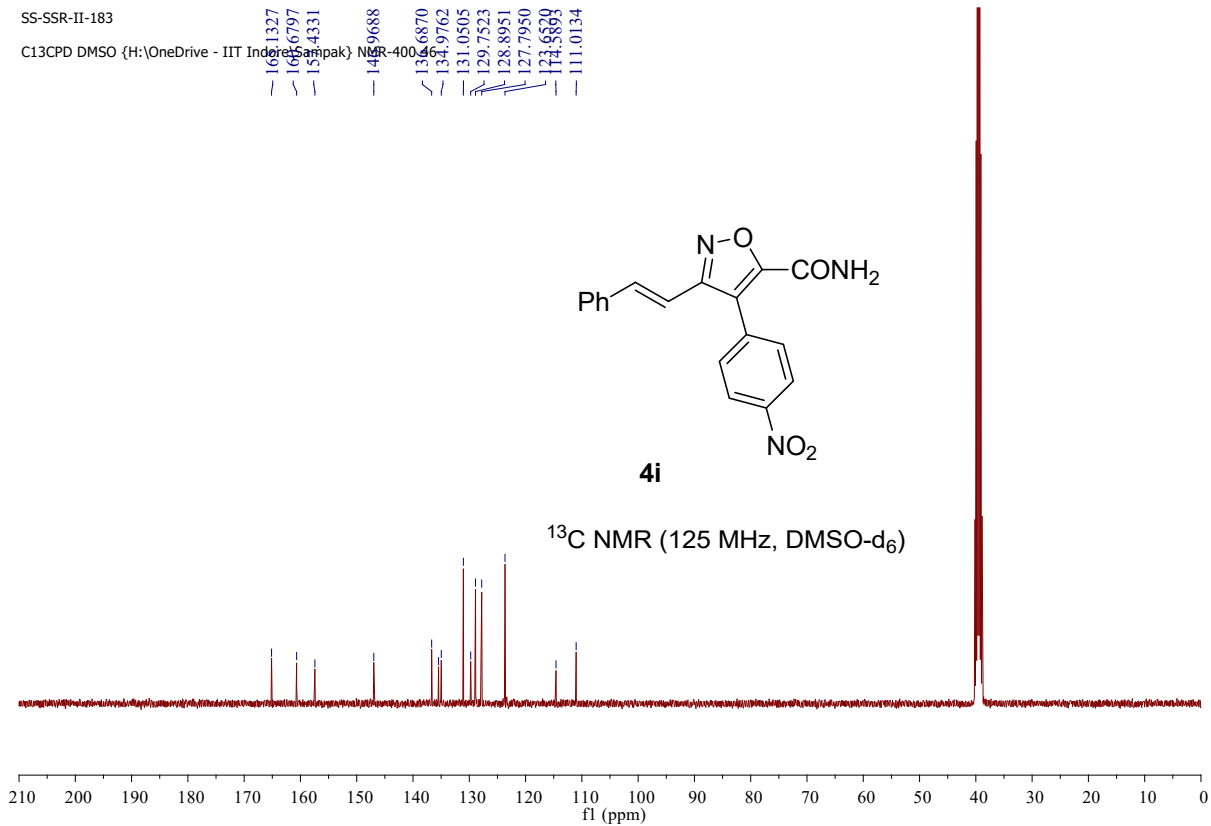

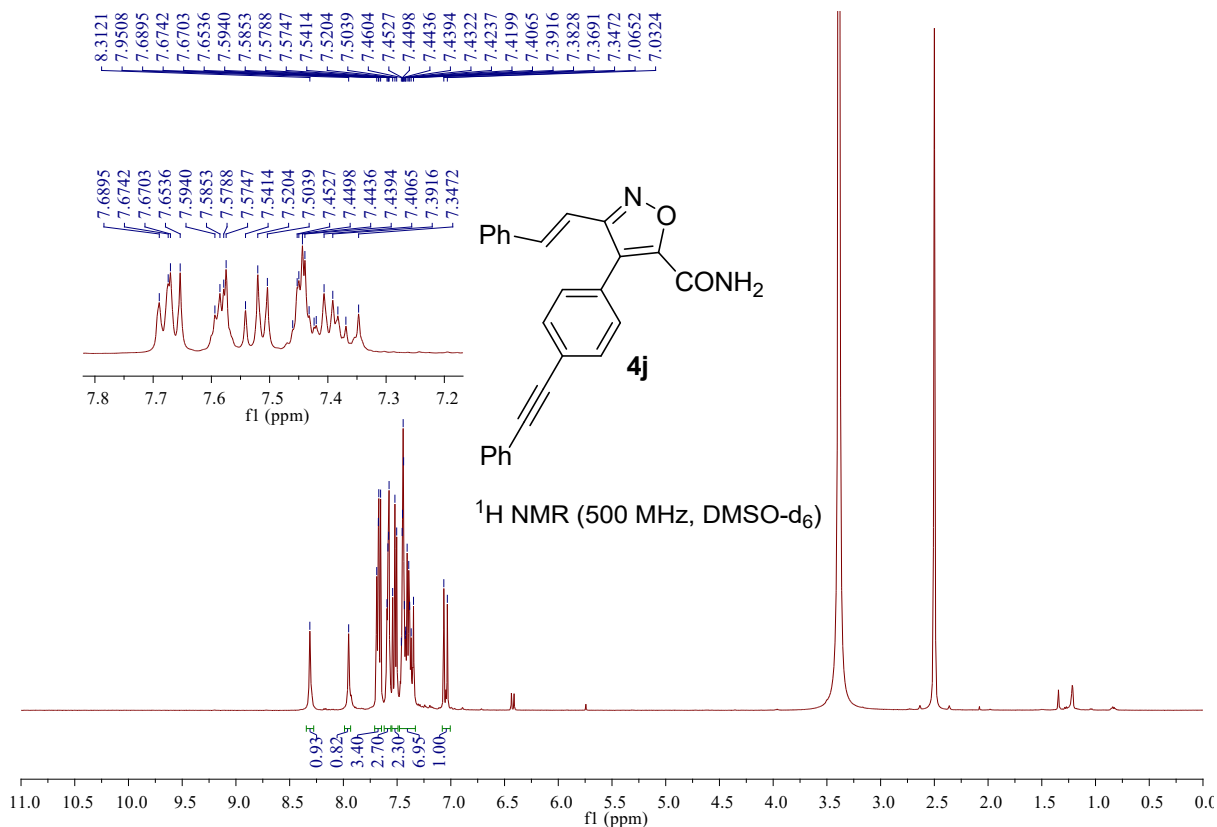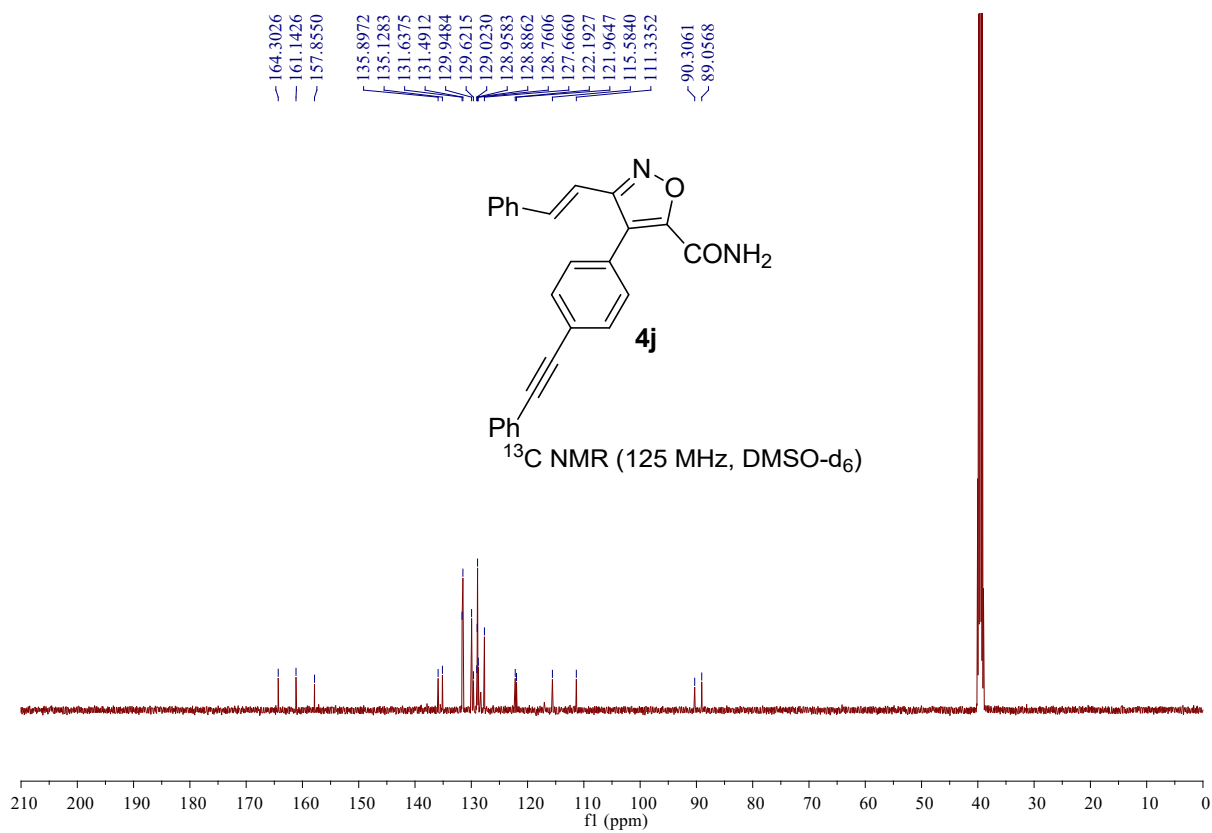

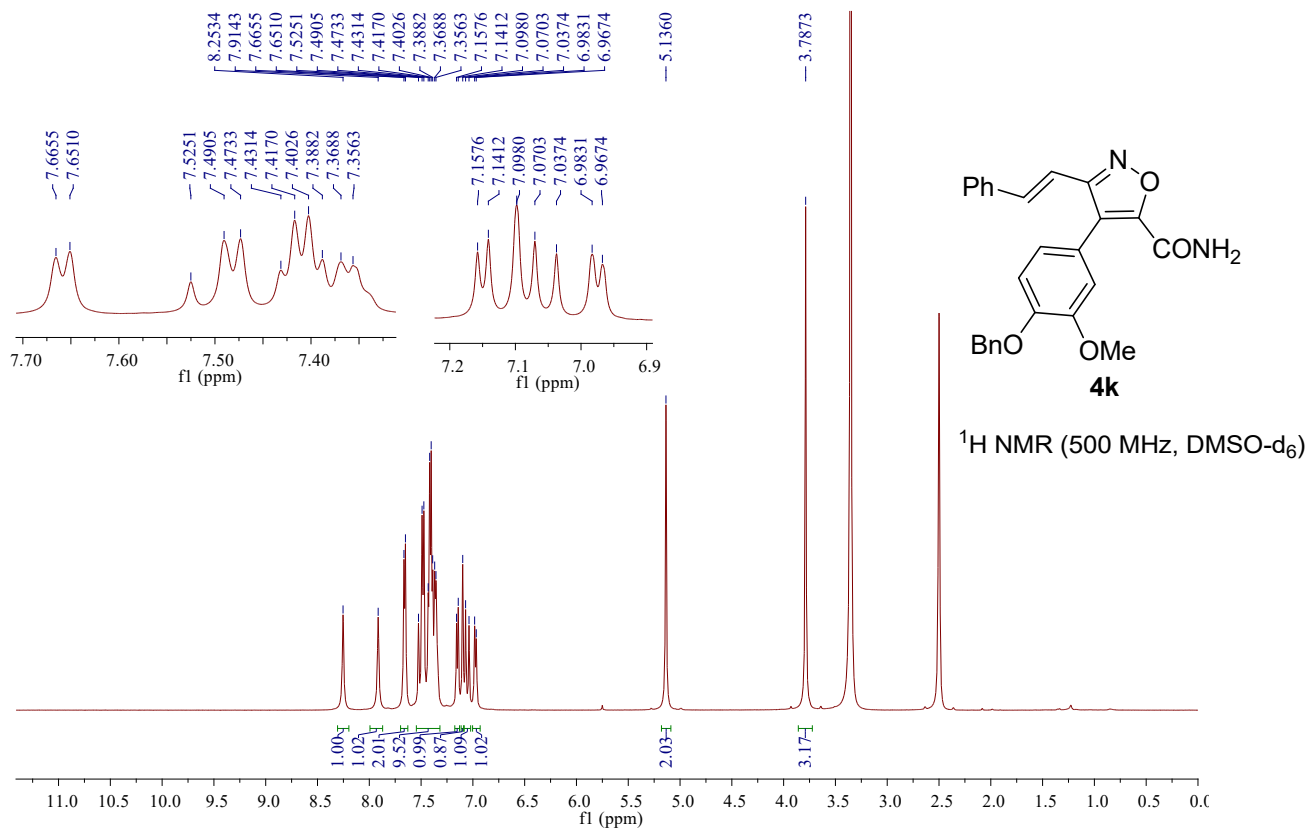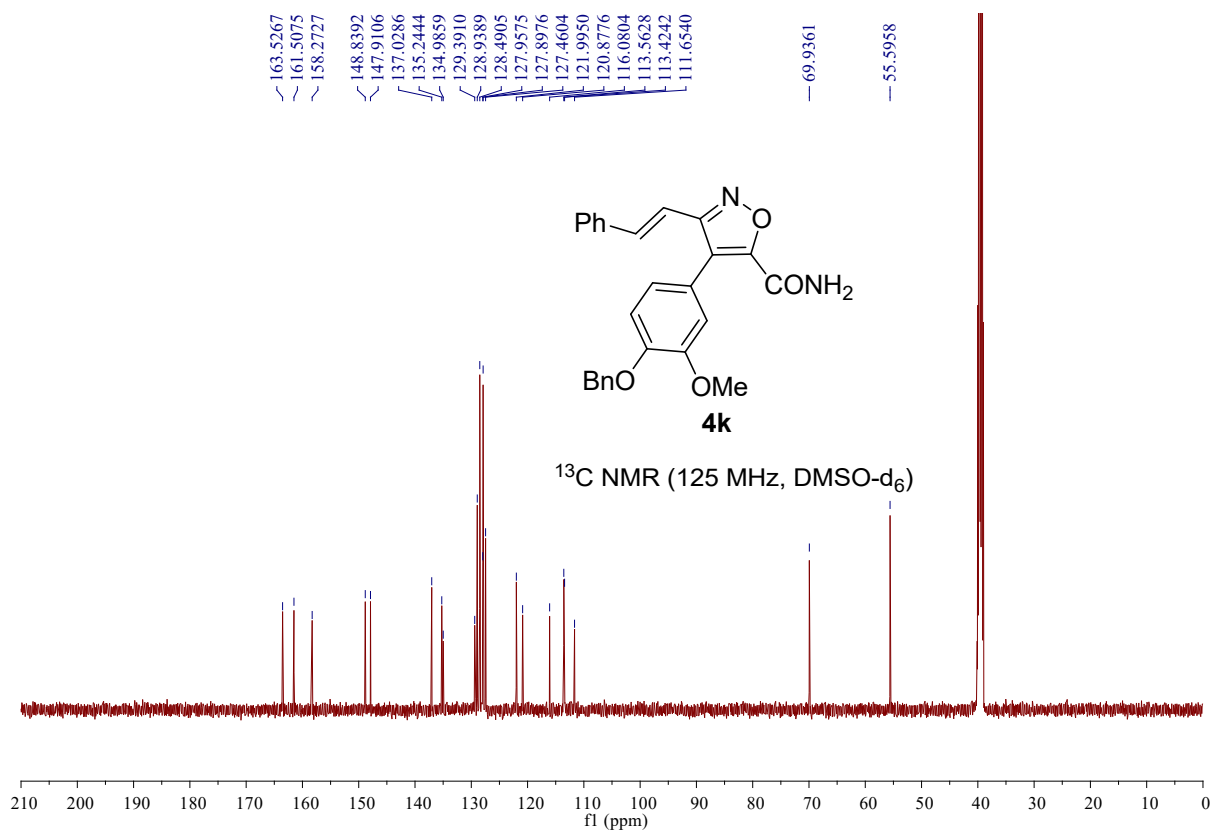

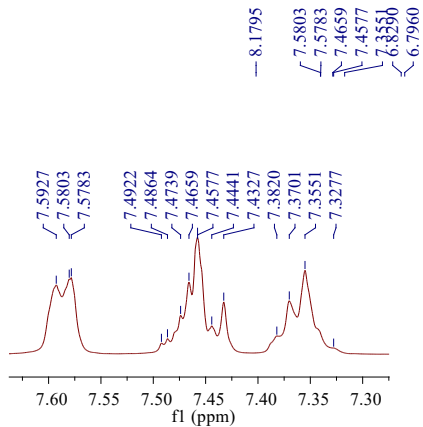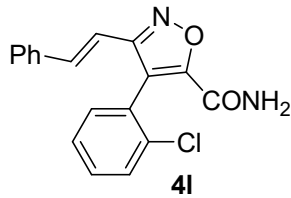

<sup>1</sup>H NMR (500 MHz, DMSO-d<sub>6</sub>)

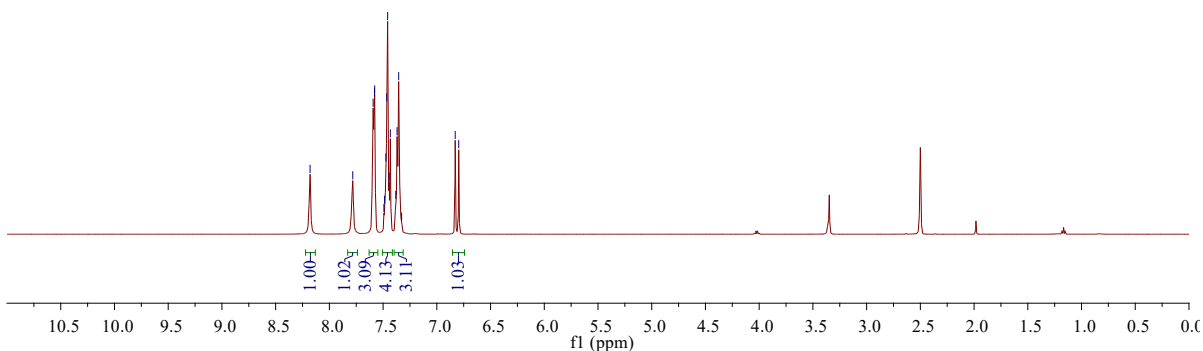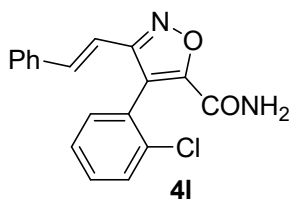

<sup>13</sup>C NMR (125 MHz, DMSO-d<sub>6</sub>)

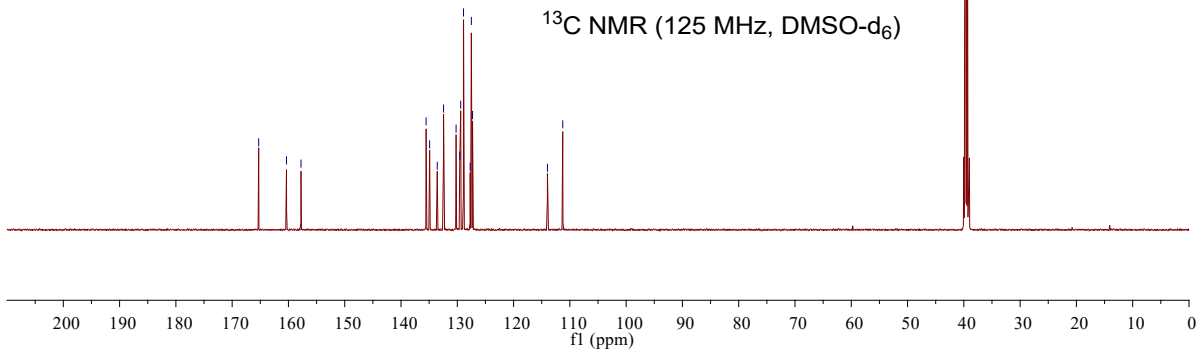

SS-SSR-II-197C

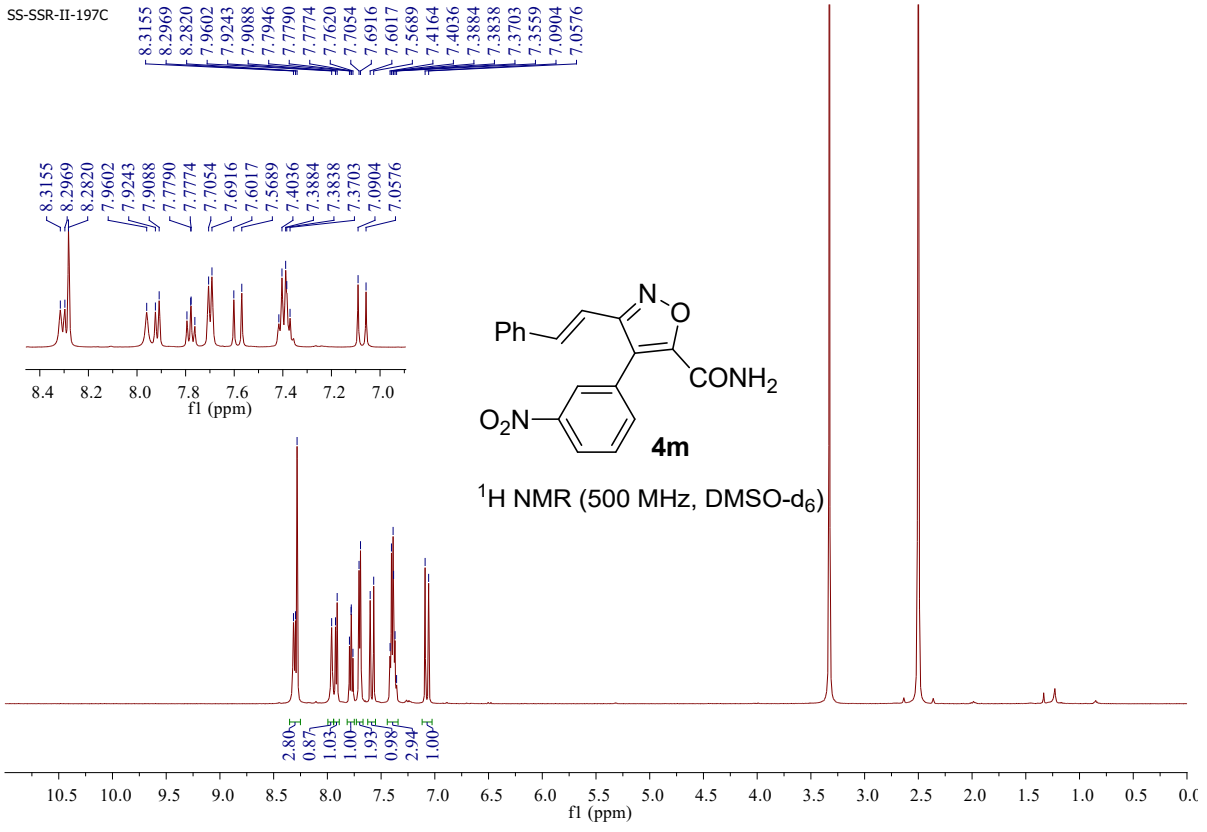

SS-SSR-II-197C

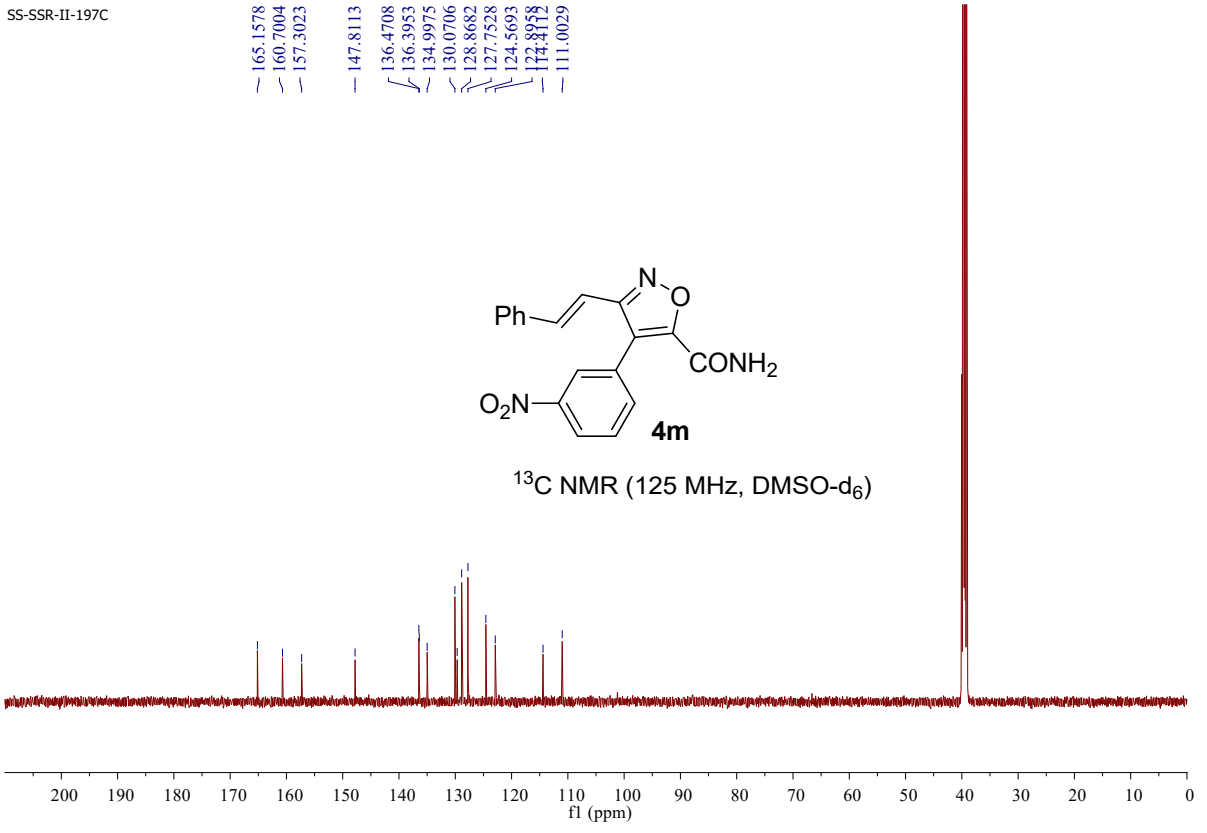

7.5343  
7.5242  
7.5100  
7.5019  
7.4698  
7.4677  
7.4595  
7.4574  
7.4046  
7.4016  
7.3880  
7.3730  
7.3615  
7.3524  
7.3473  
7.3439  
7.3417  
7.3367  
7.3346  
7.1568  
7.1496  
7.1465  
7.1393  
7.0676  
7.0347  
6.6604  
5.7252

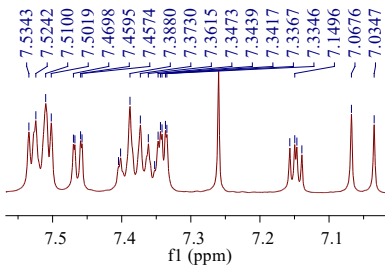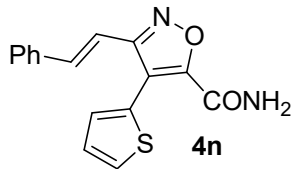

<sup>1</sup>H NMR (500 MHz, CDCl<sub>3</sub>)

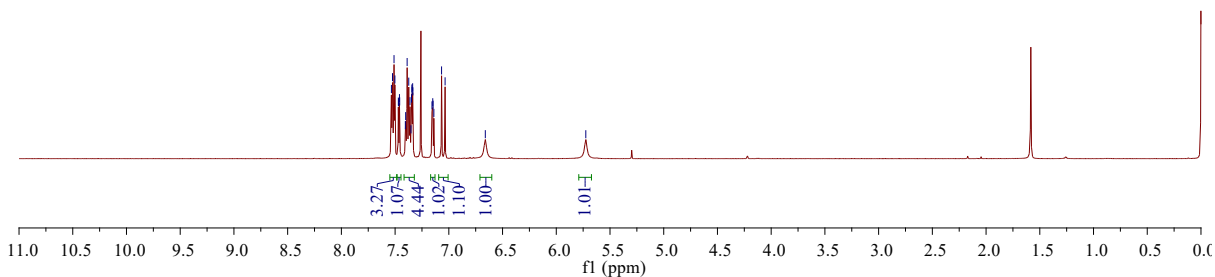

166.8393  
160.6895  
155.4307  
136.4746  
135.4812  
130.0293  
129.7065  
129.0773  
128.2422  
127.5666  
127.5373  
111.6768  
111.0847

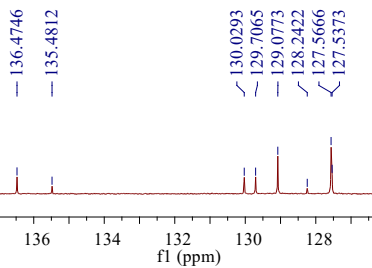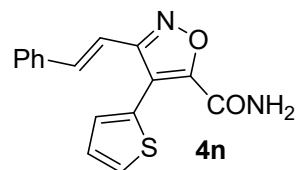

<sup>13</sup>C NMR (125 MHz, CDCl<sub>3</sub>)

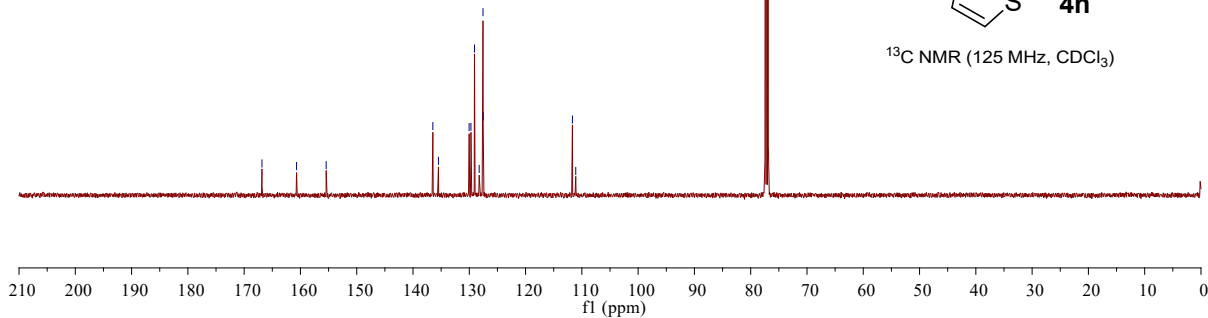



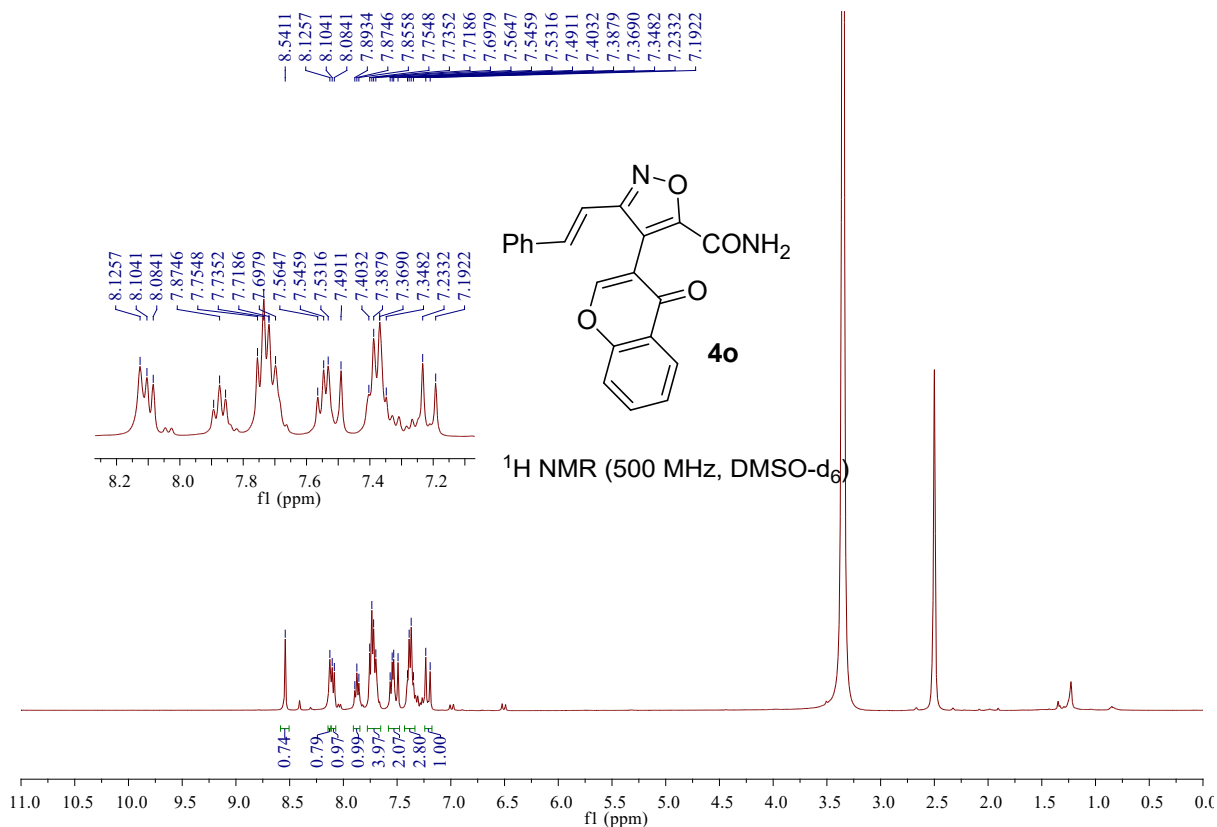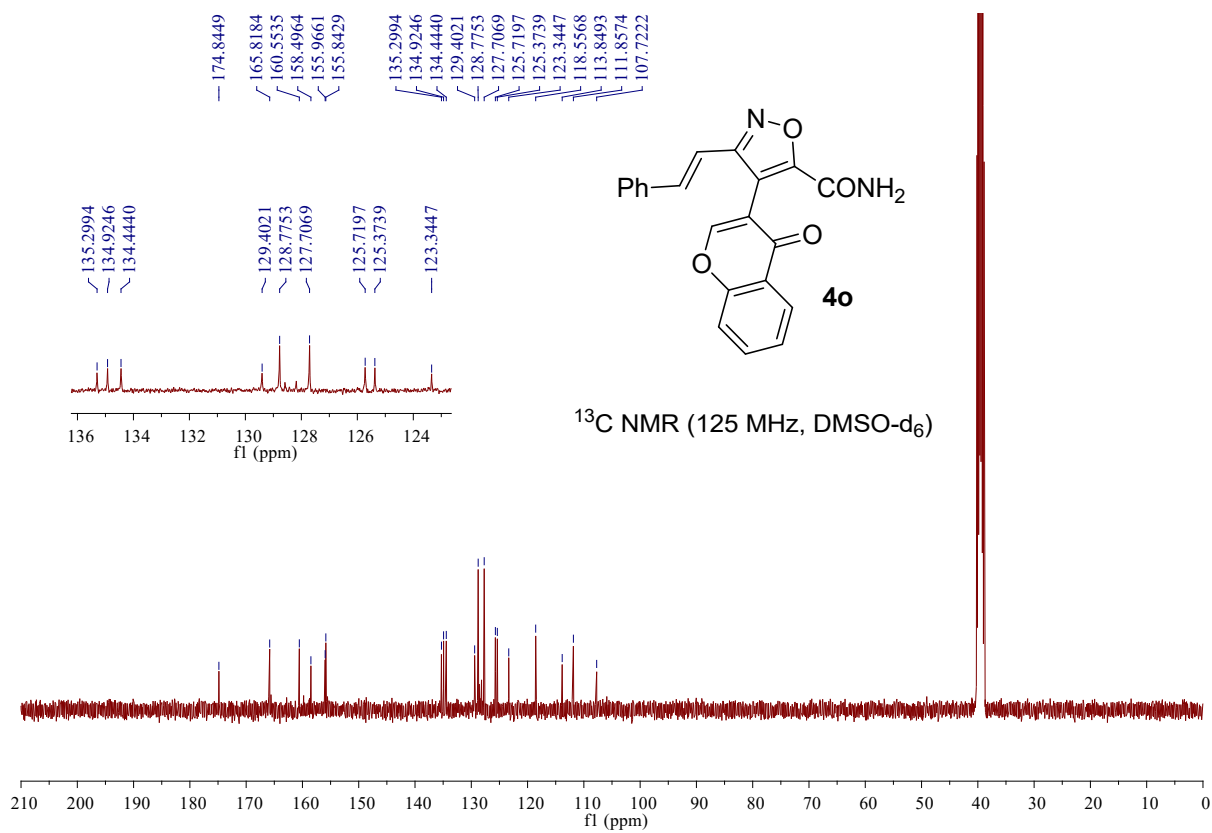

SS-SSR-II-238

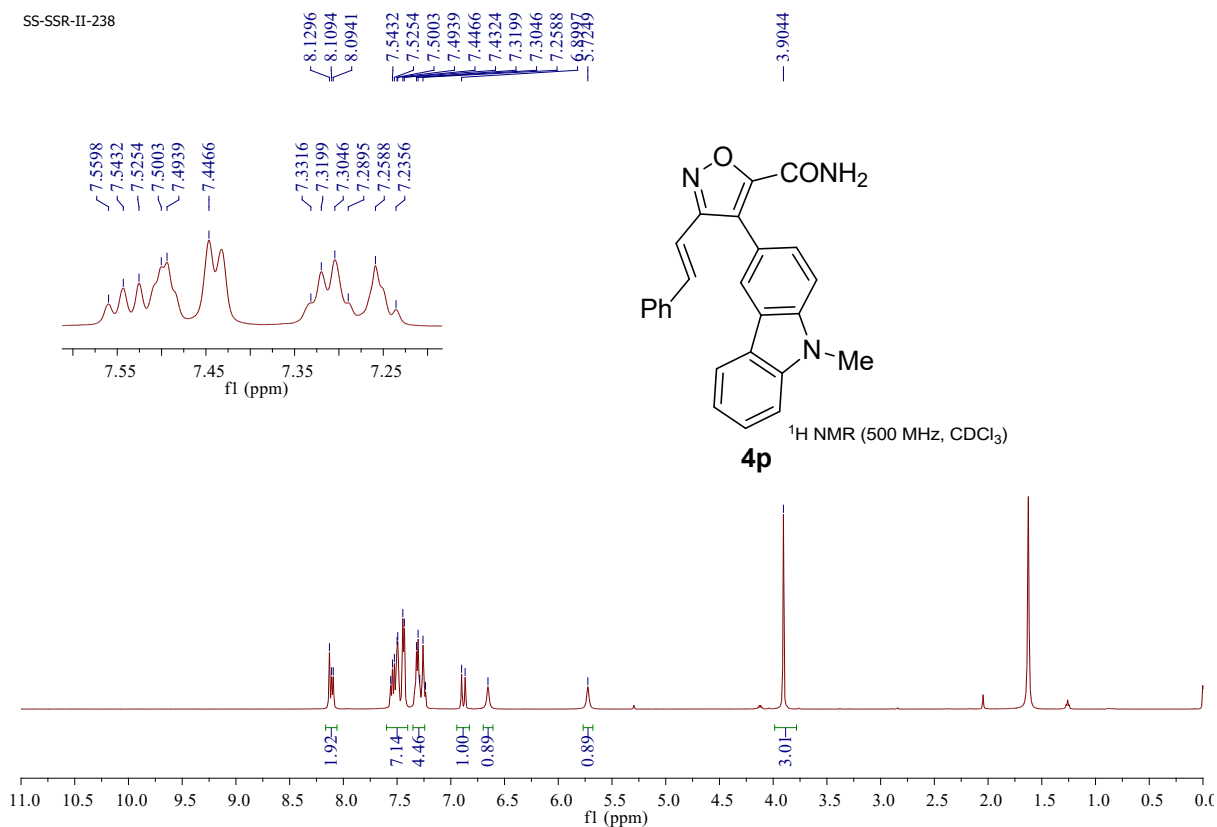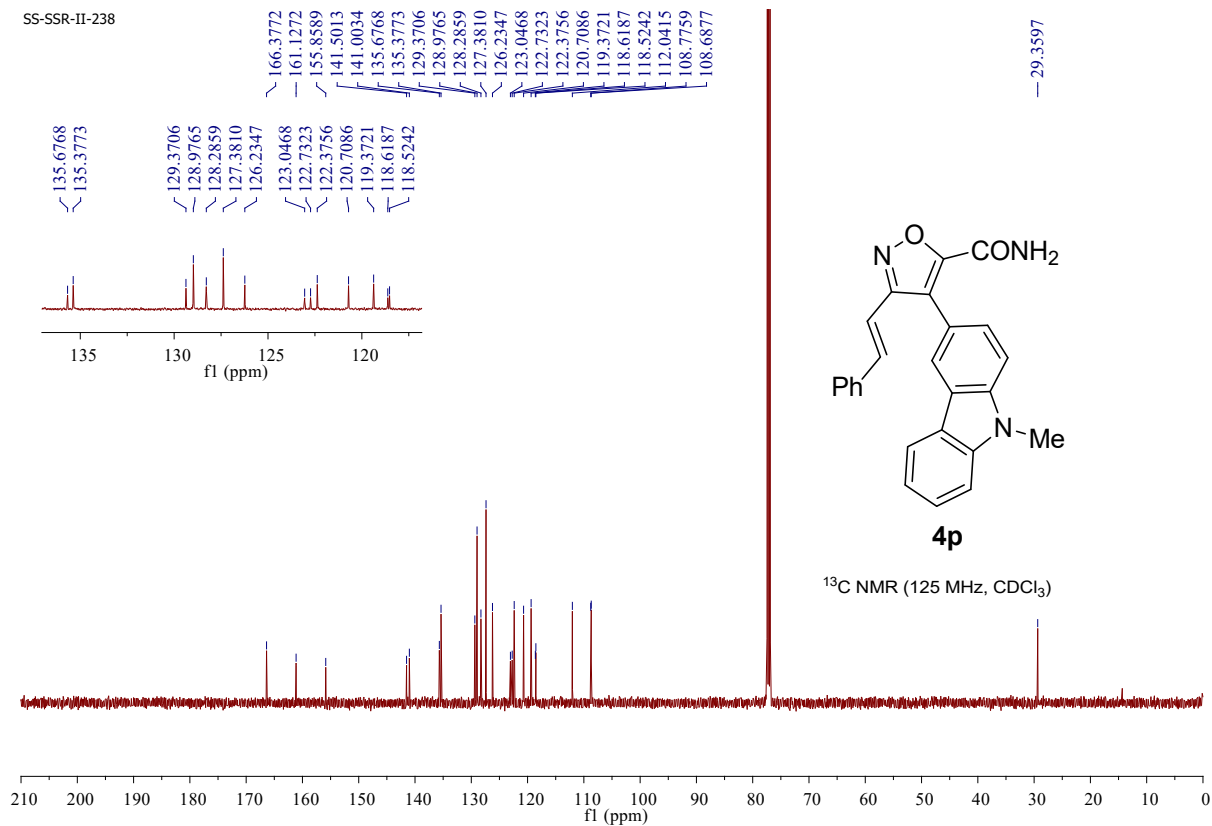

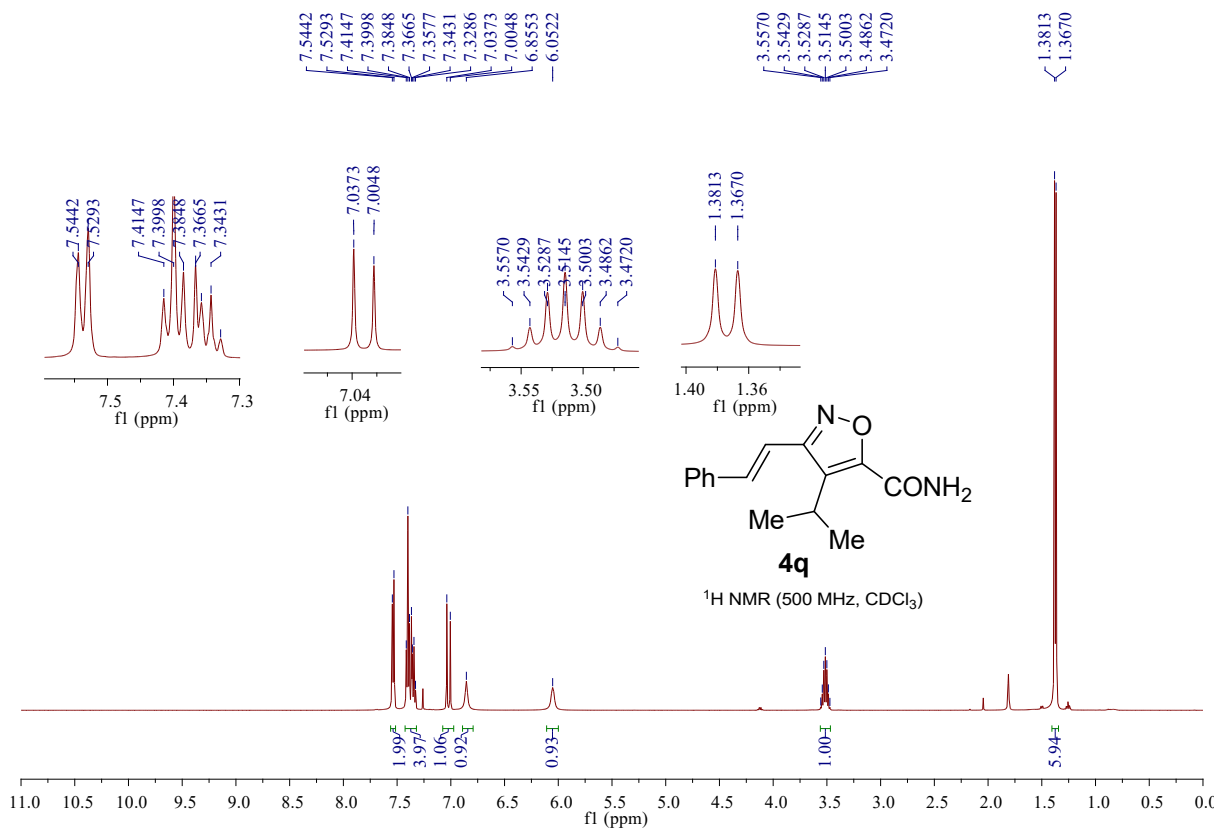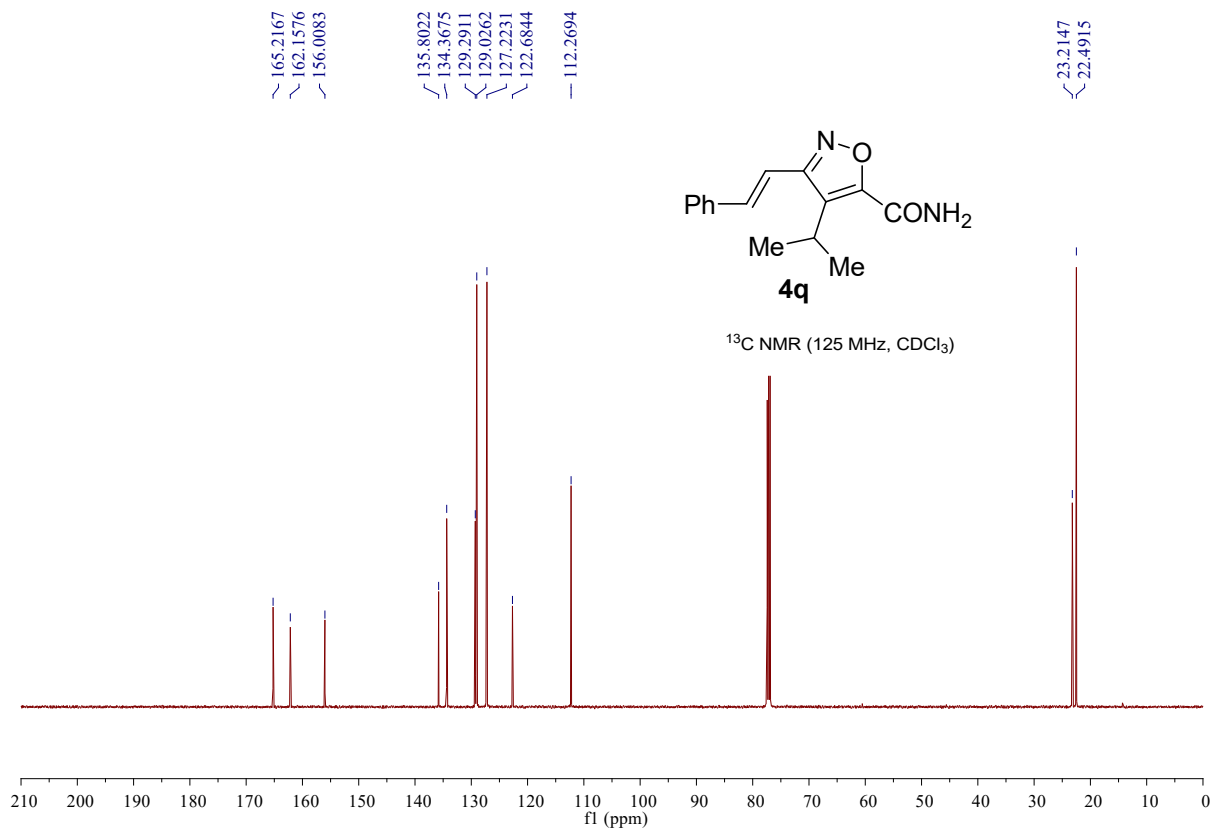

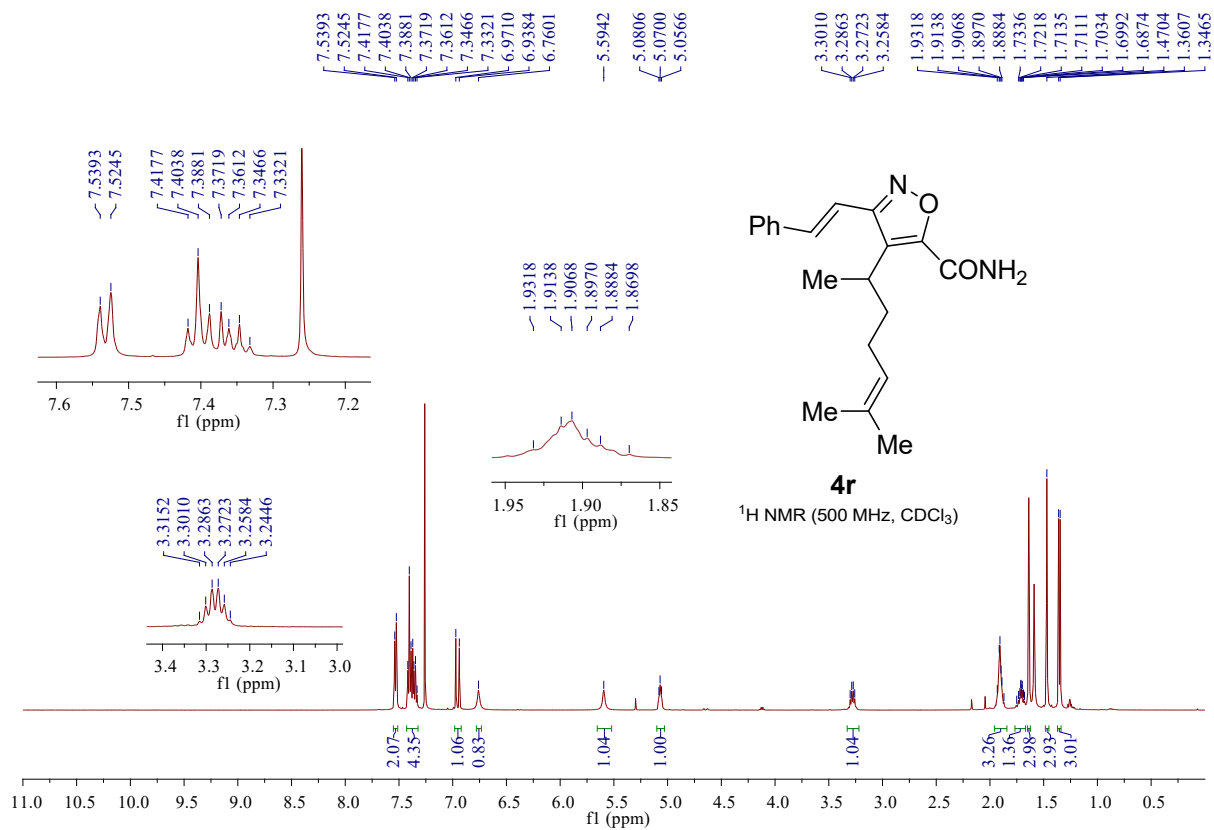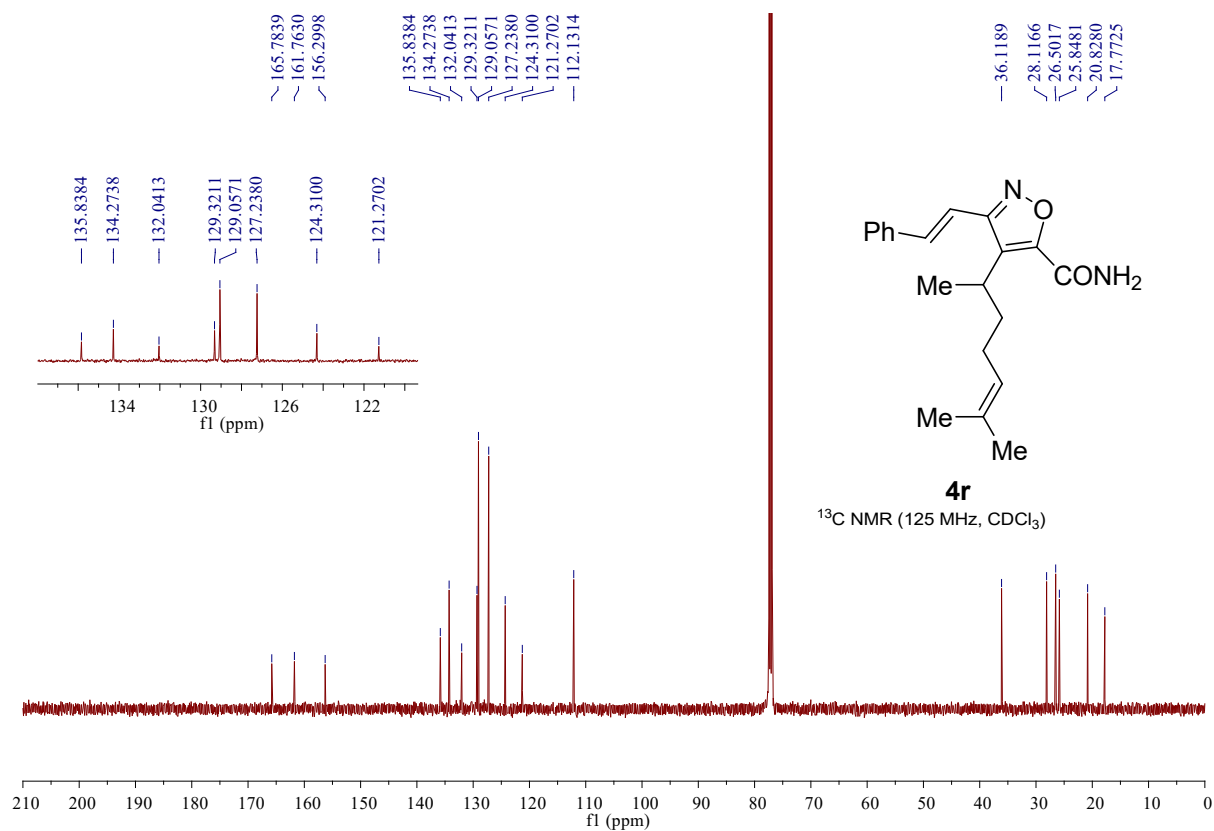

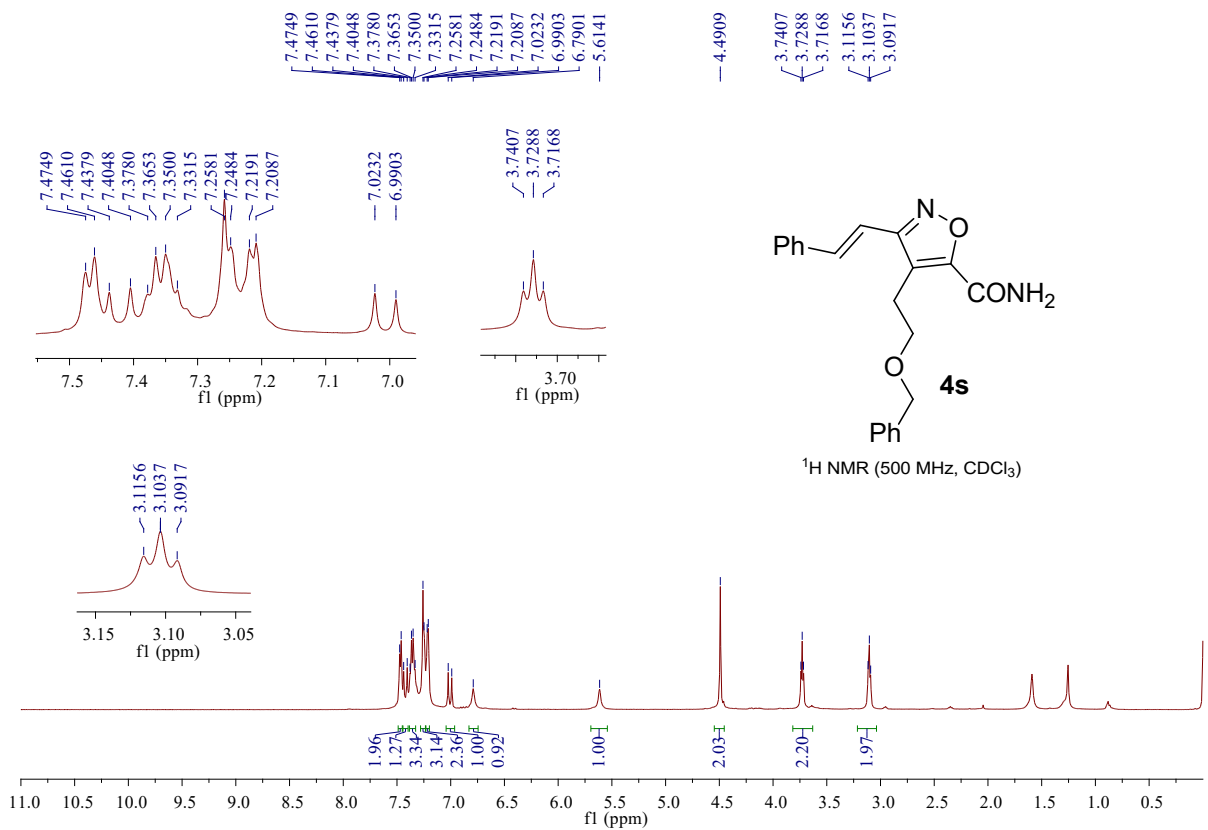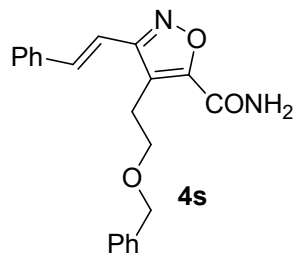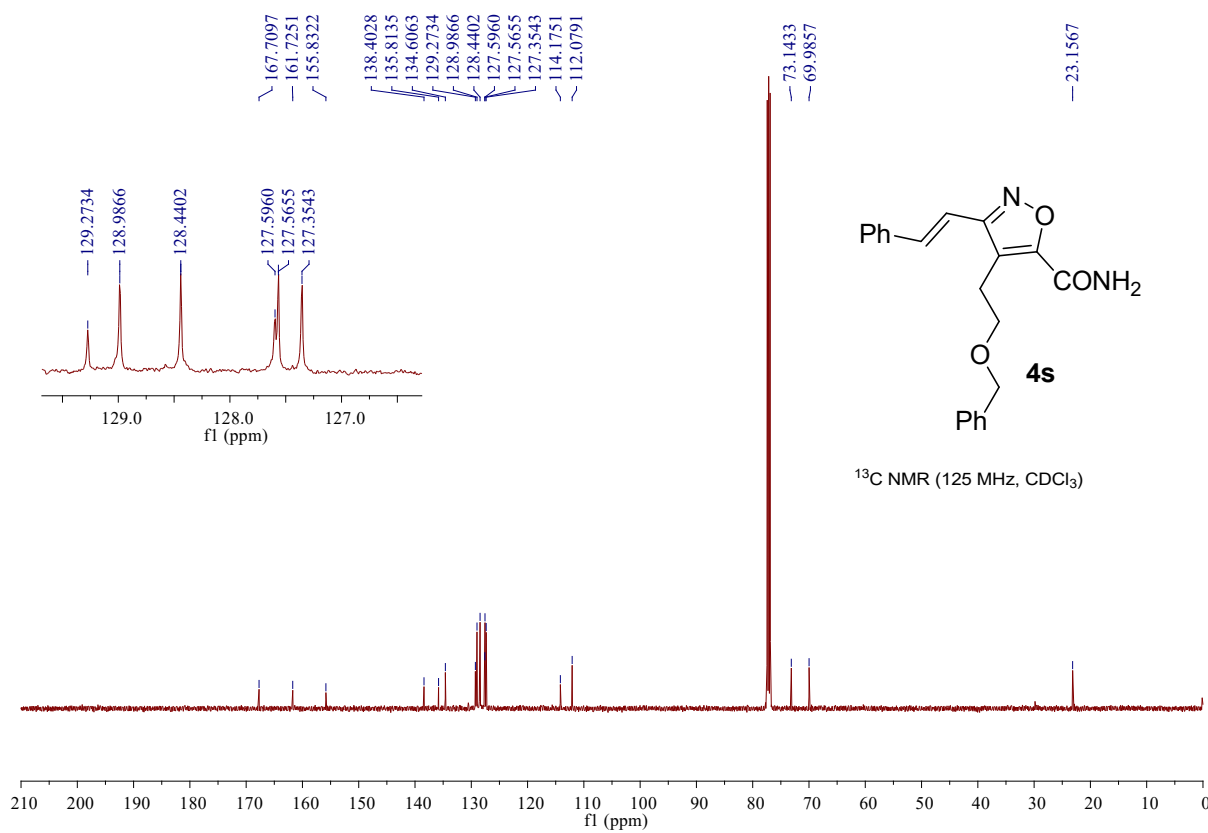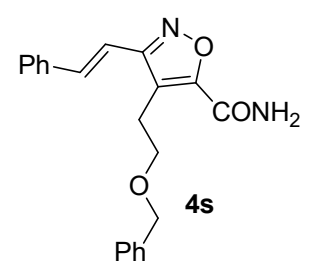

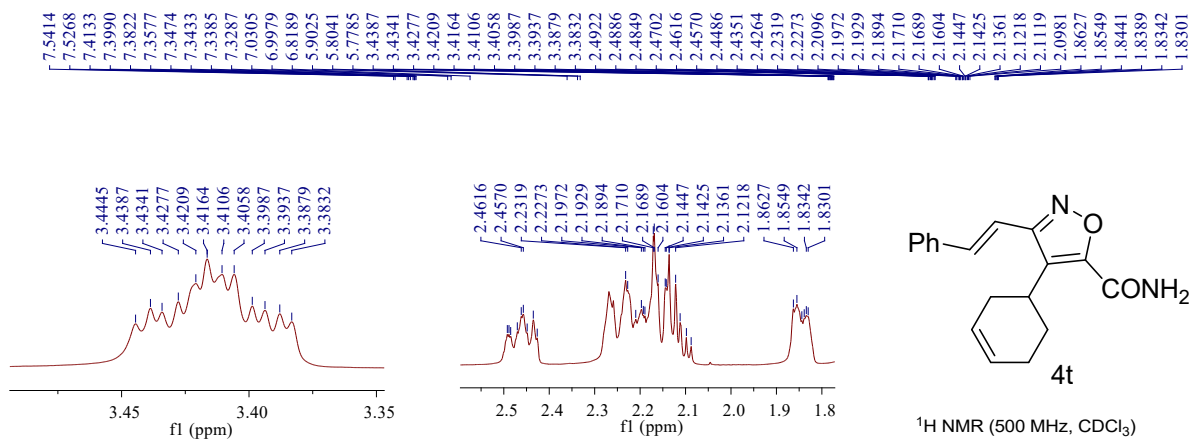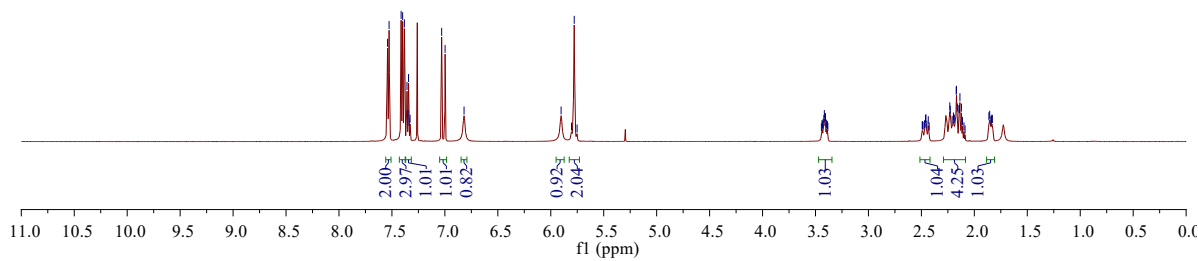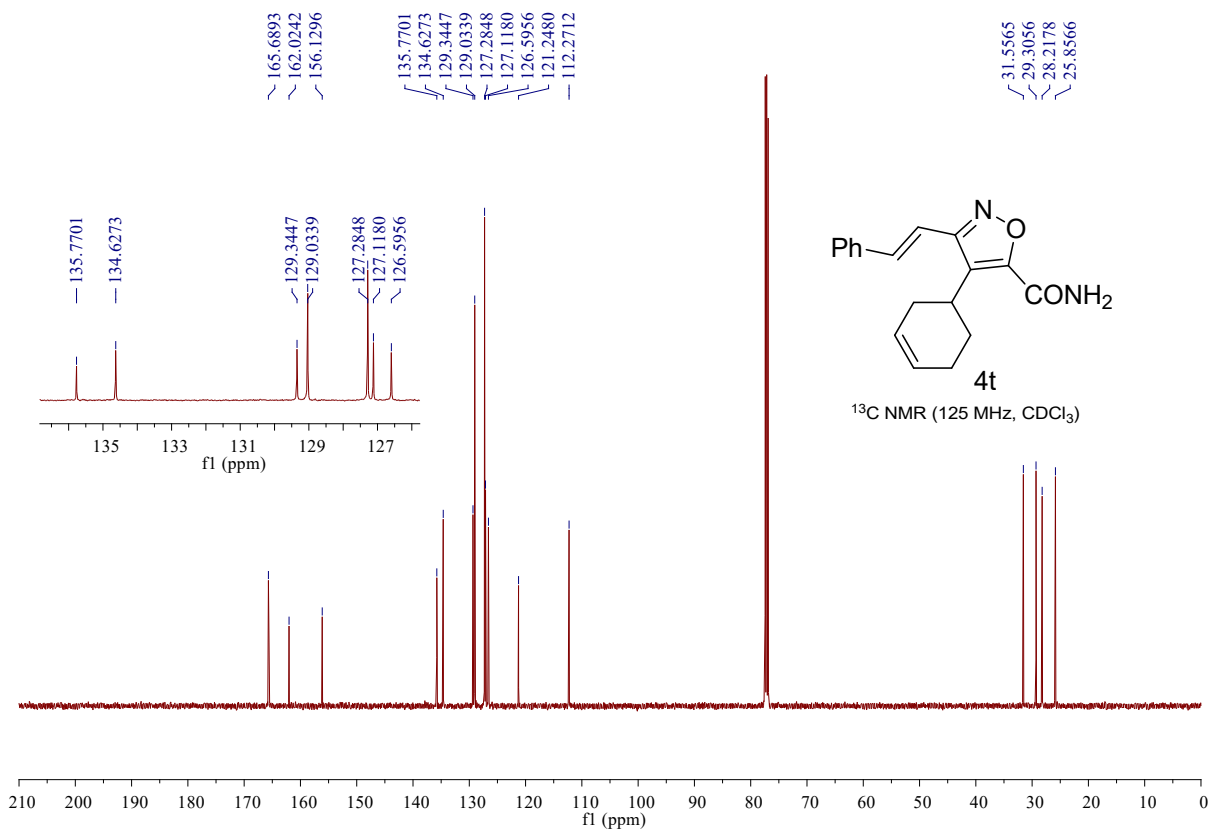

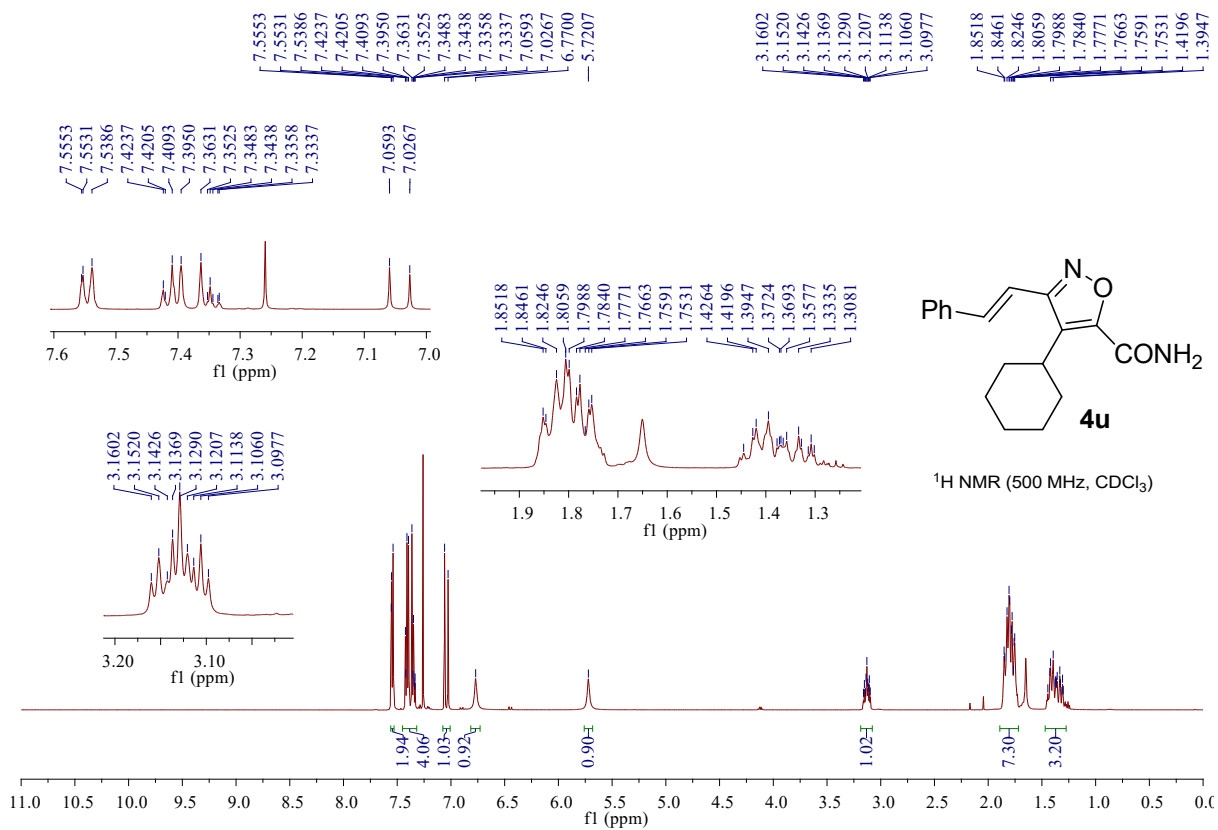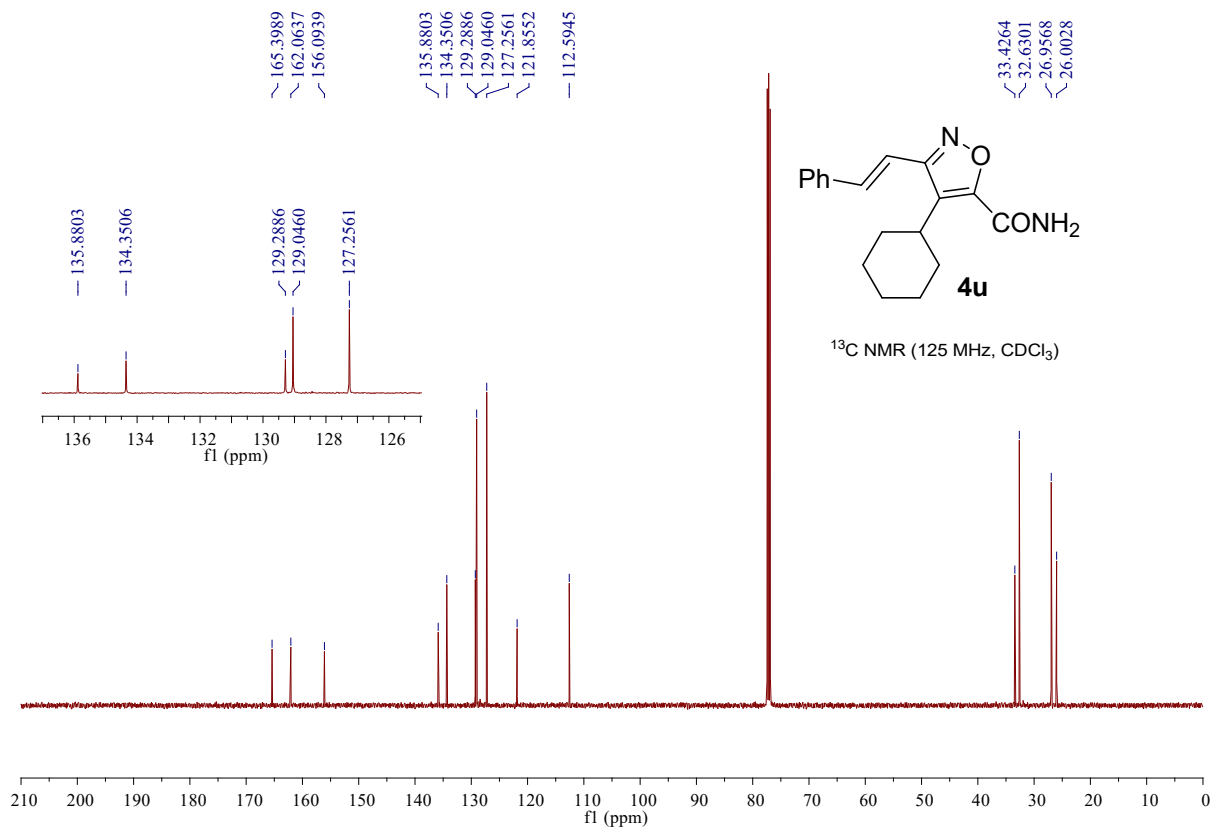

SS-SSR-II-225

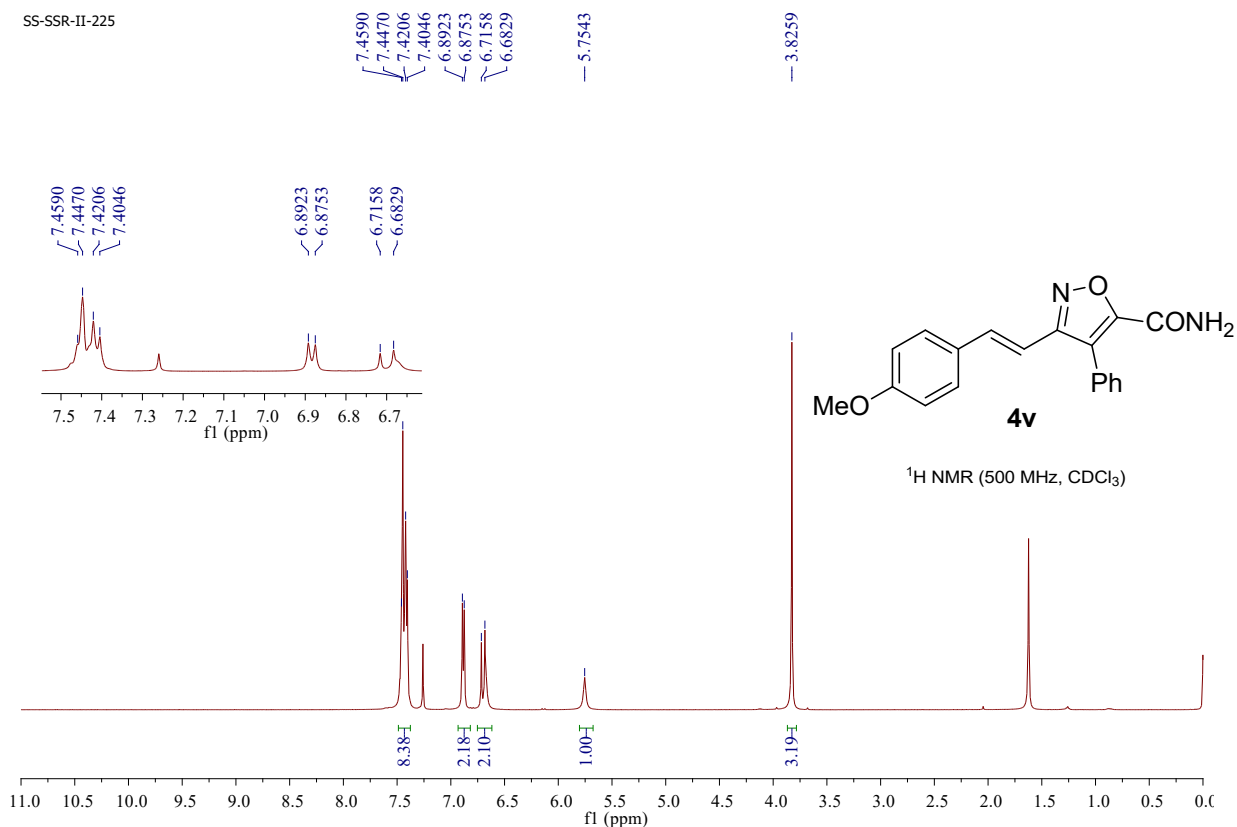

SS-SSR-II-225

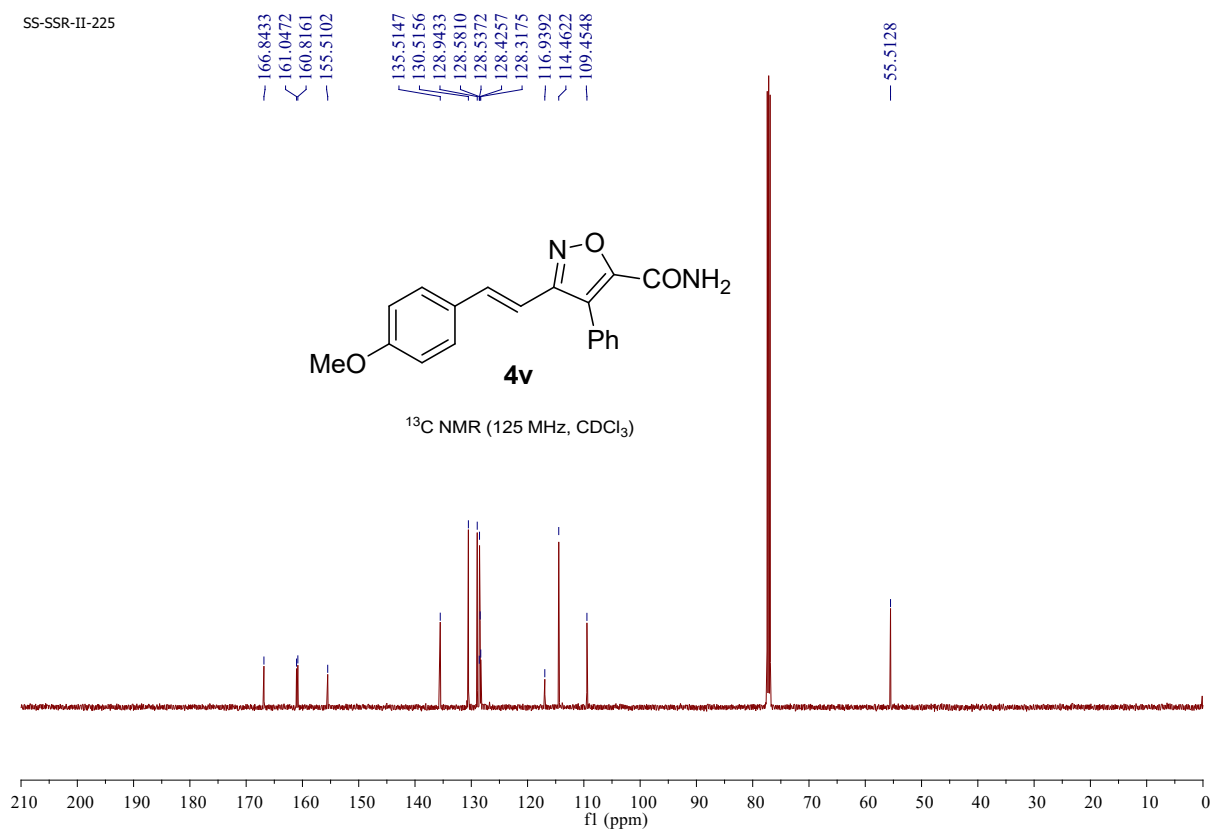



SS-SSR-II-227

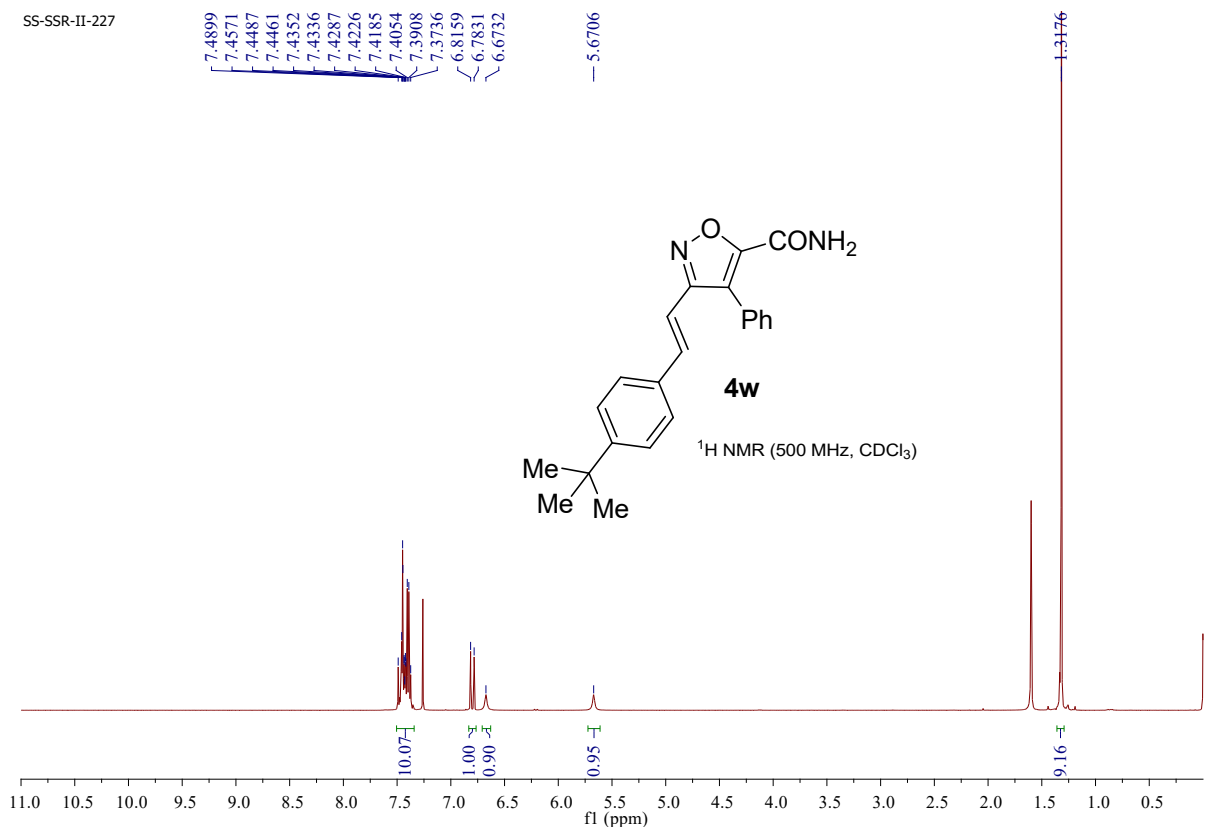

SS-SSR-II-227

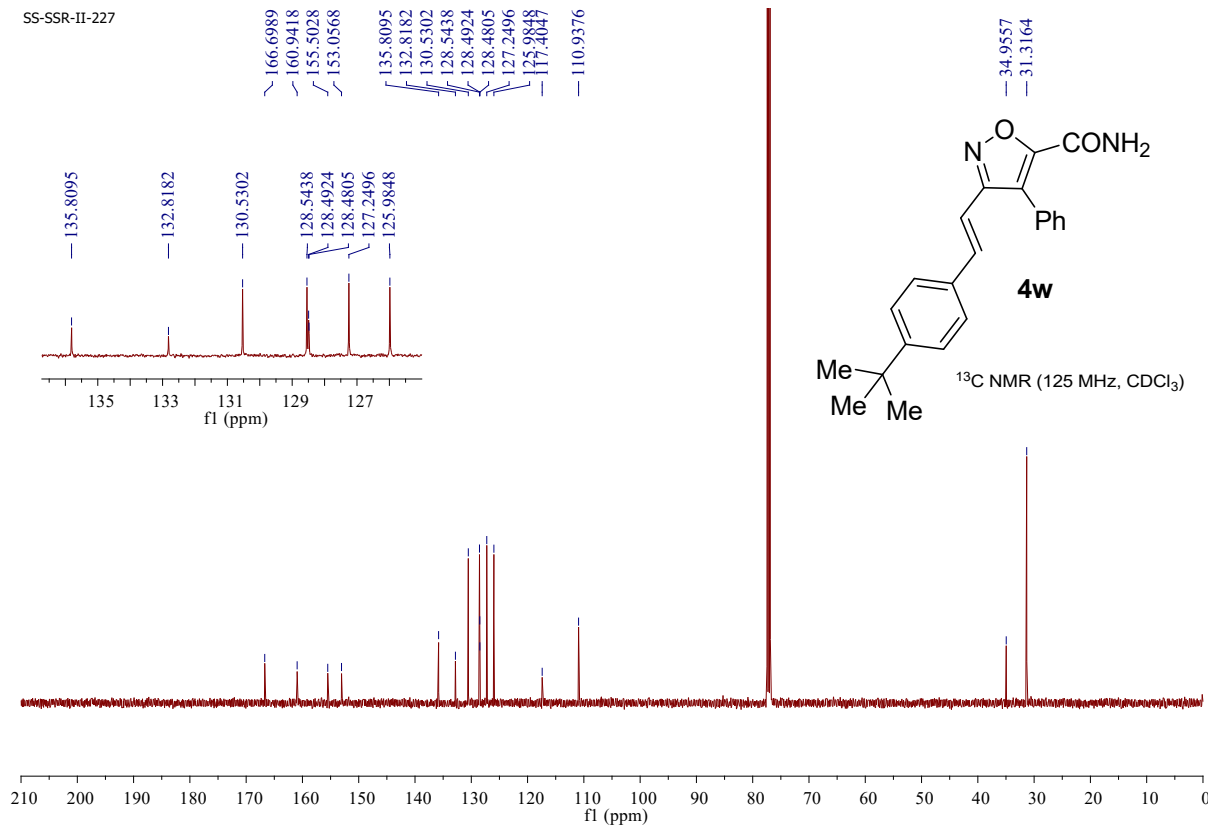

SS-SSR-II-224

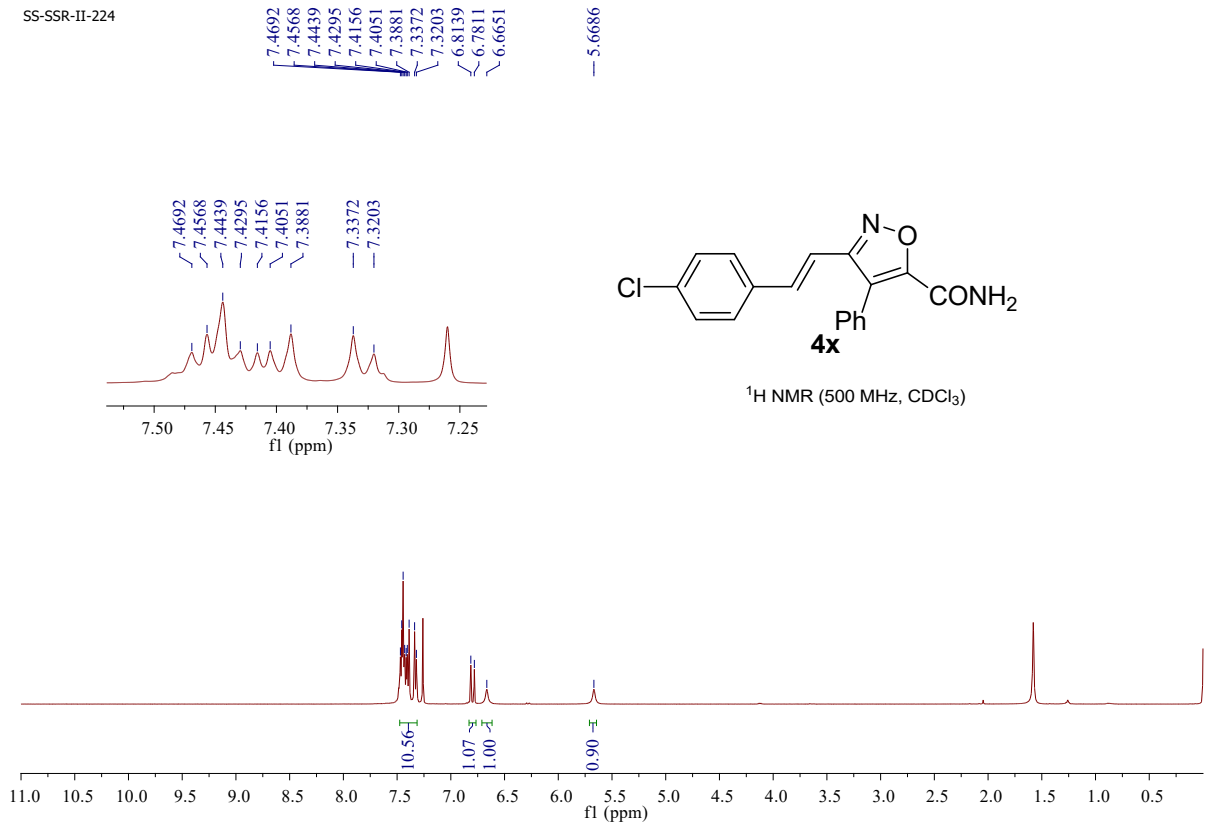

SS-SSR-II-224

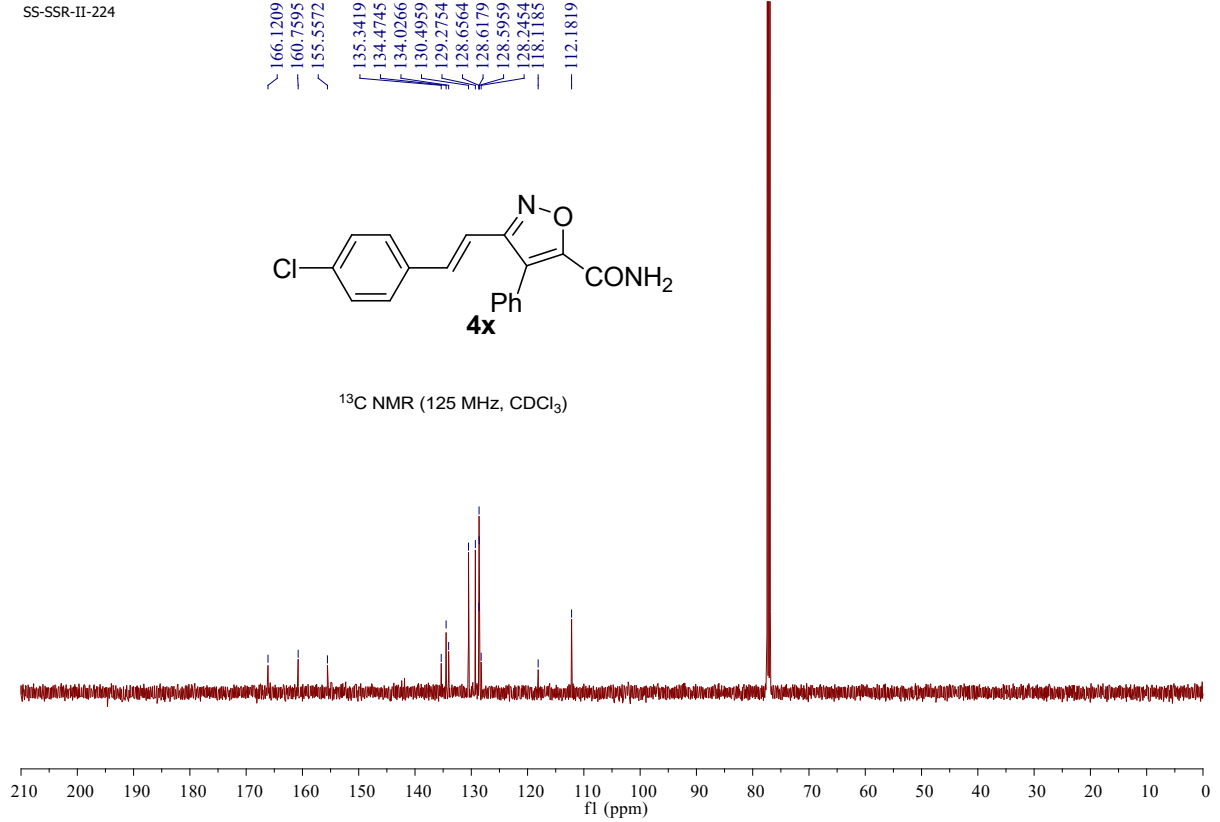

SS-SSR-II-244

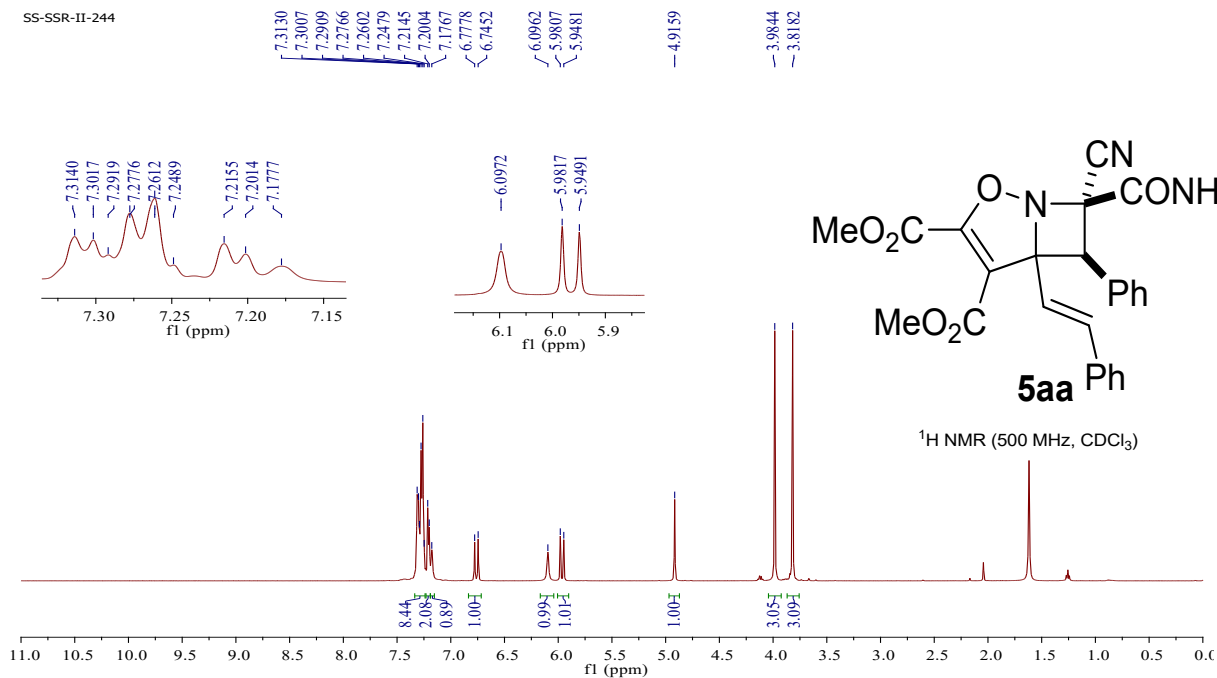

SS-SSR-II-244

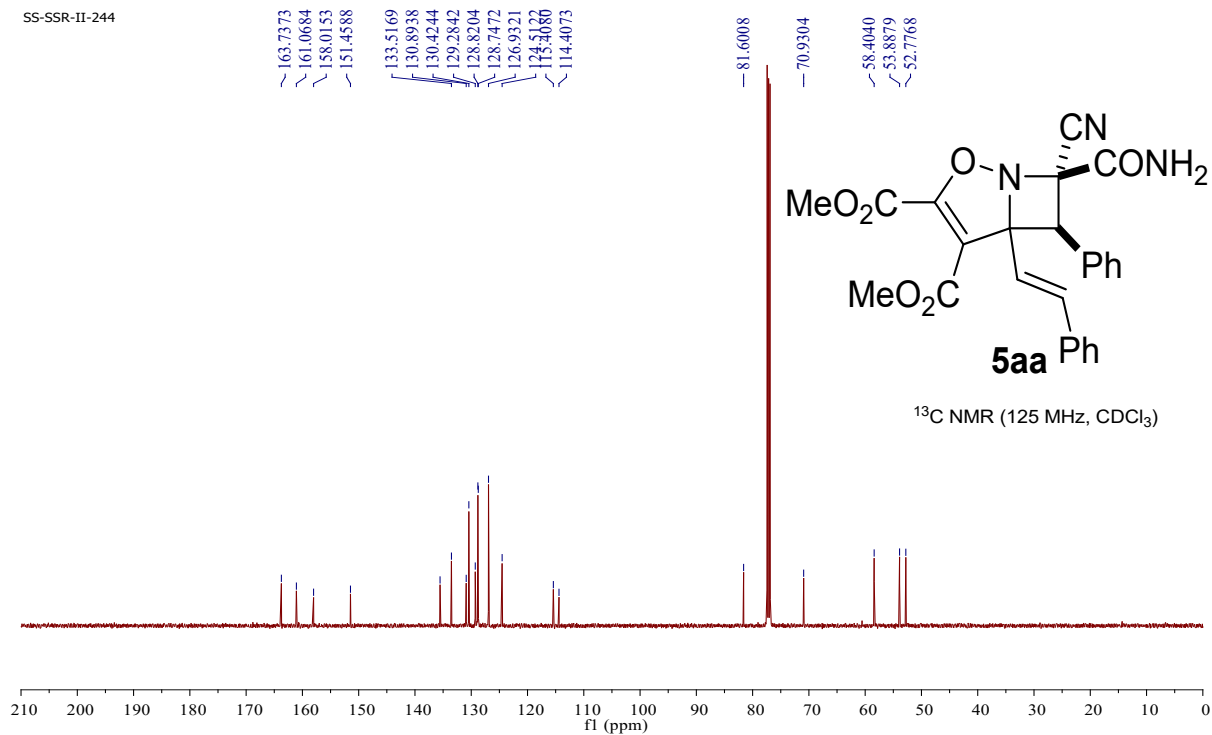

SS-SSR-II-HYD

7.3334  
7.3291  
7.2597  
7.2465  
7.2311  
7.2094  
7.1953  
7.1808  
6.6054  
5.9768

3.0513  
3.0478  
3.0385  
3.0270  
3.0140  
3.0026  
2.9918

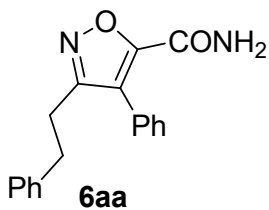

<sup>1</sup>H NMR (500 MHz, CDCl<sub>3</sub>)

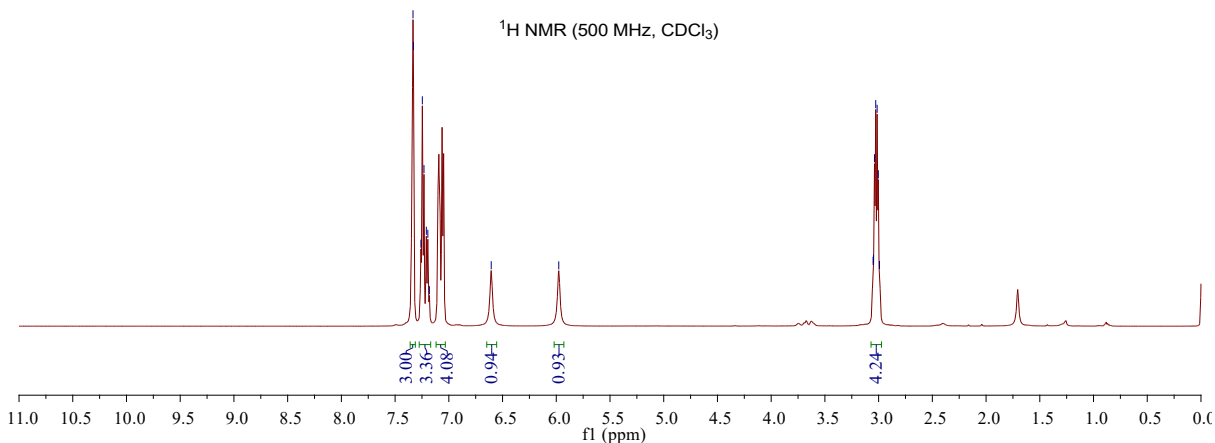

SS-SSR-II-HYD

170.8410  
161.2371  
155.1930  
139.7792  
130.0066  
128.7135  
128.4322  
128.3653  
127.6105

33.7205  
27.7387

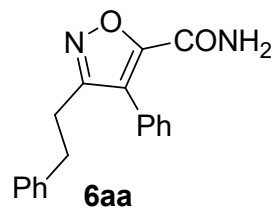

<sup>13</sup>C NMR (125 MHz, CDCl<sub>3</sub>)

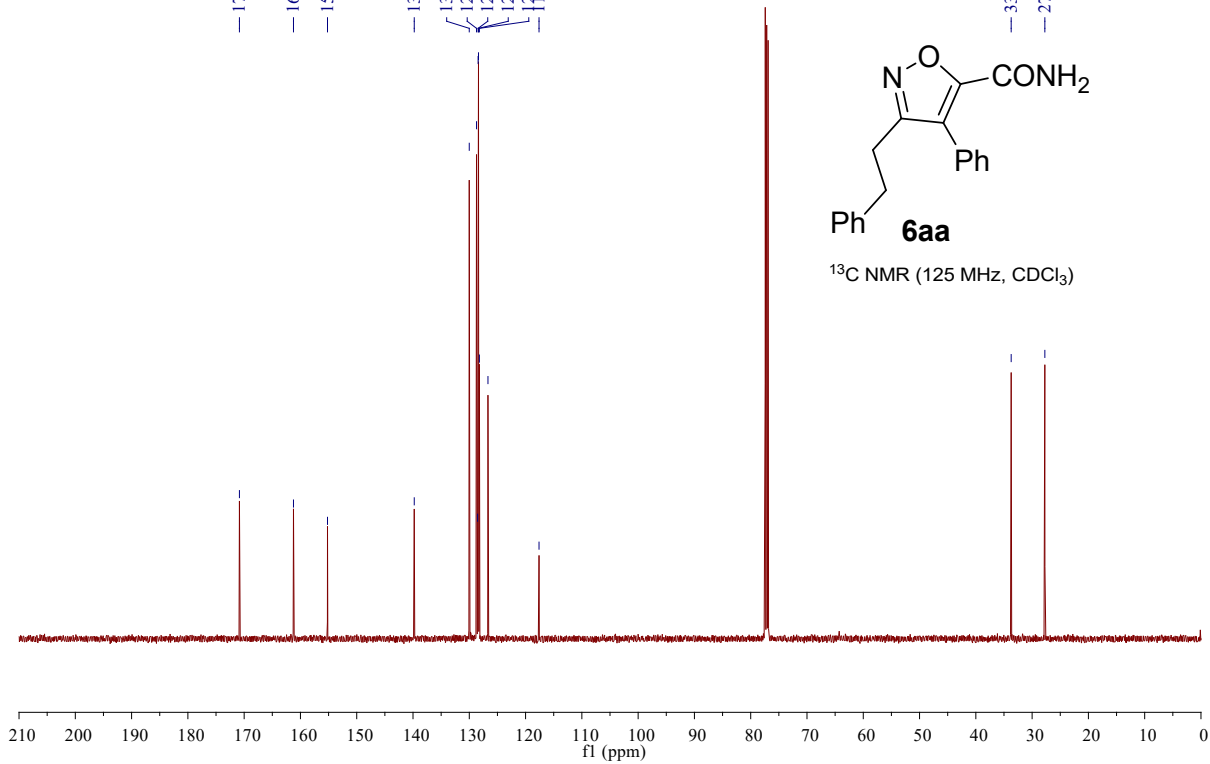

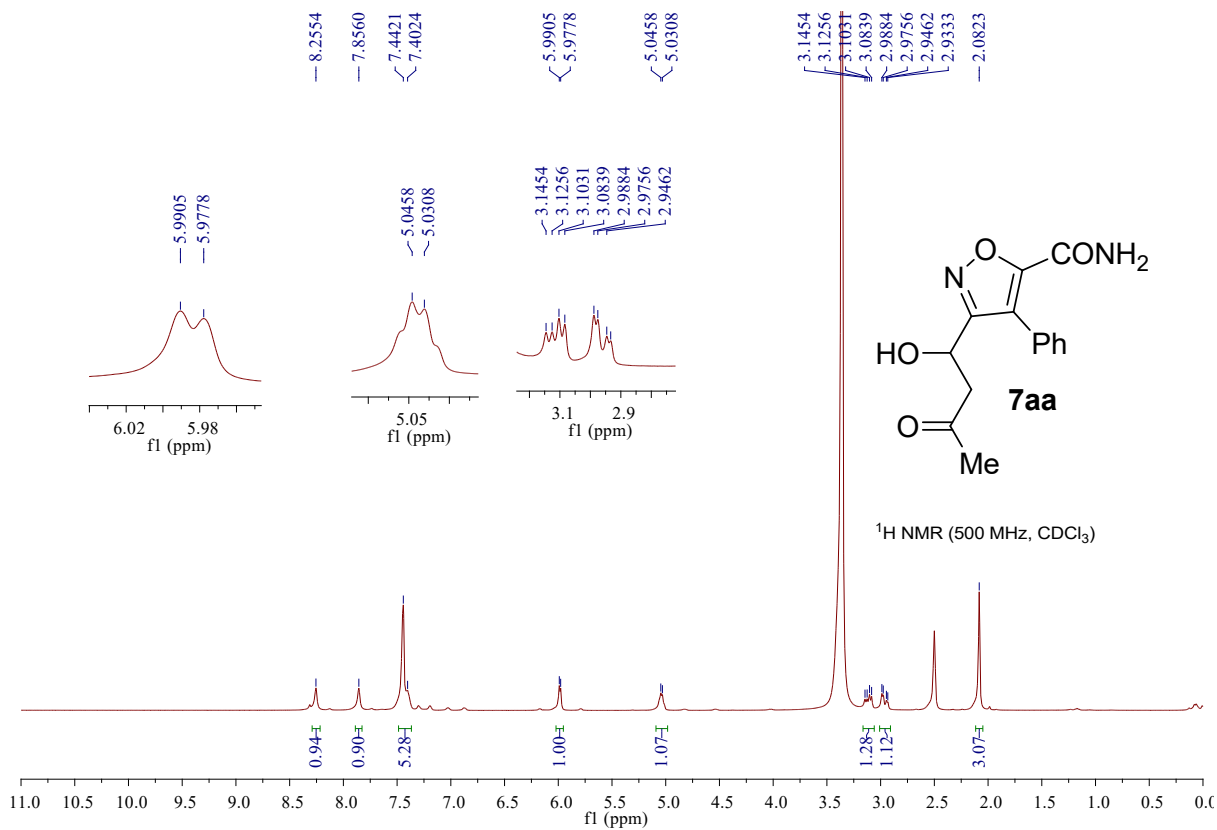

SS-SSR-1120X-A

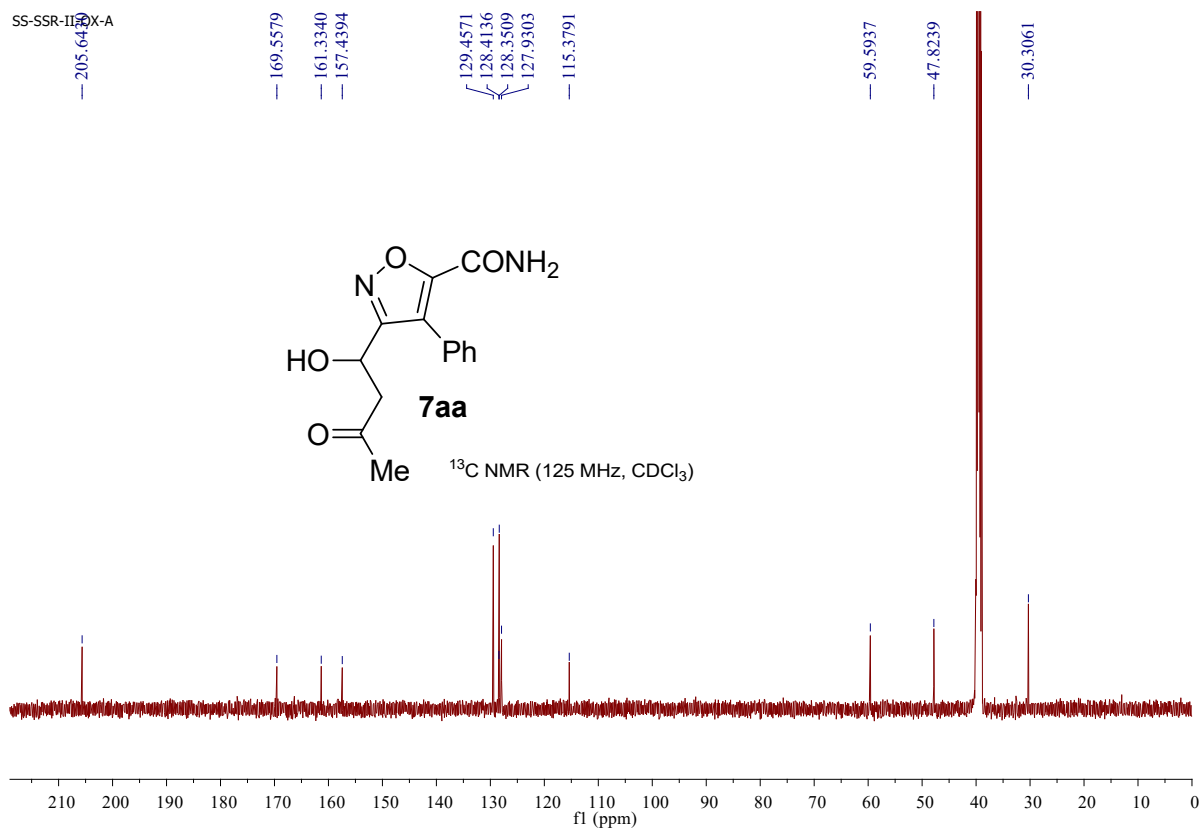

SS-SSR-II-226-LOW

7.4756  
7.4756  
7.4682  
7.4682  
7.4545  
7.4552  
7.4464  
7.4384  
7.4347  
7.4286  
7.4111  
7.4085  
7.3946  
7.3918  
7.3795  
7.3583  
7.3484  
7.3439  
7.3291  
7.2292  
7.2148  
7.2080  
7.2052  
7.1928  
7.1892  
5.3662  
5.3635  
5.3545  
5.3518  
5.3384  
4.5303  
4.5123  
3.7158  
3.7044  
3.6979  
3.6865  
3.3798  
3.3635  
3.3508  
3.3345  
3.1195  
3.1060  
3.0905  
3.0770  
3.0770  
3.0905  
3.1060  
3.1195  
3.3345  
3.3508  
3.3635  
3.3798  
3.6865  
3.6979  
3.7044  
3.7158

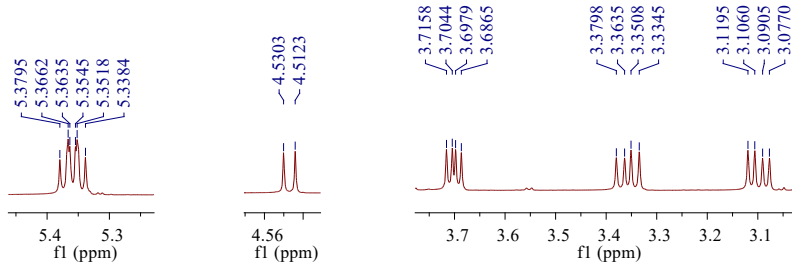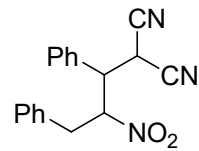

Compound **8** (minor)

<sup>1</sup>H NMR (500 MHz, CDCl<sub>3</sub>)

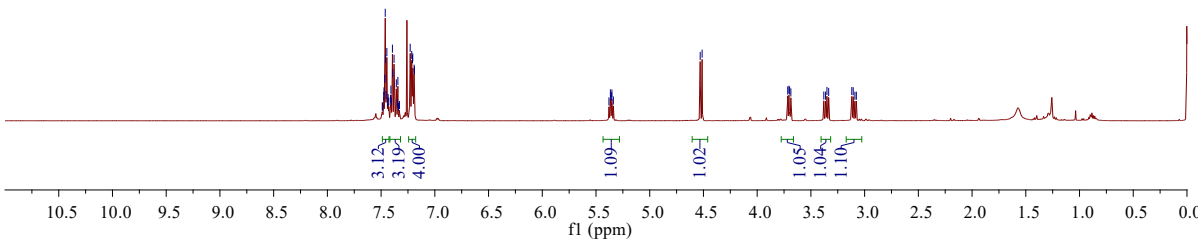

SS-SSR-II-226-LOW

133.6606  
131.0002  
130.6576  
129.9970  
129.5942  
128.9593  
128.3863  
128.1723  
111.1968  
110.9485  
88.0384  
48.5172  
36.9661  
27.2273

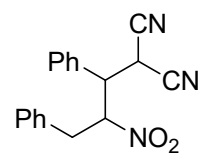

Compound **8** (minor)

<sup>13</sup>C NMR (125 MHz, CDCl<sub>3</sub>)

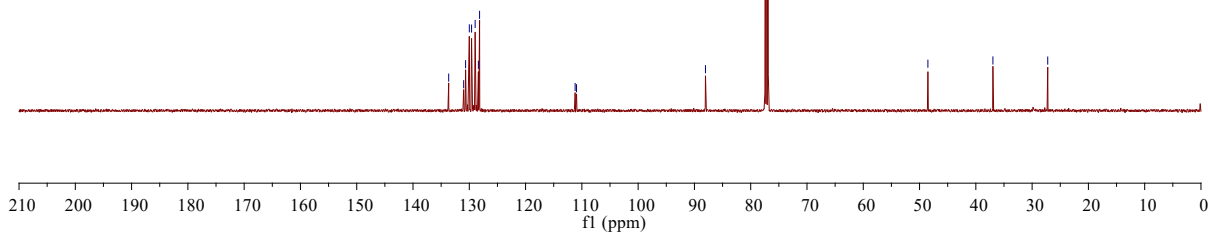

SS-SSR-2-226A-UP

PROTONRO CDCI3 {H:\OneDrive - IIT Indore\Sampak} NMR-400 19

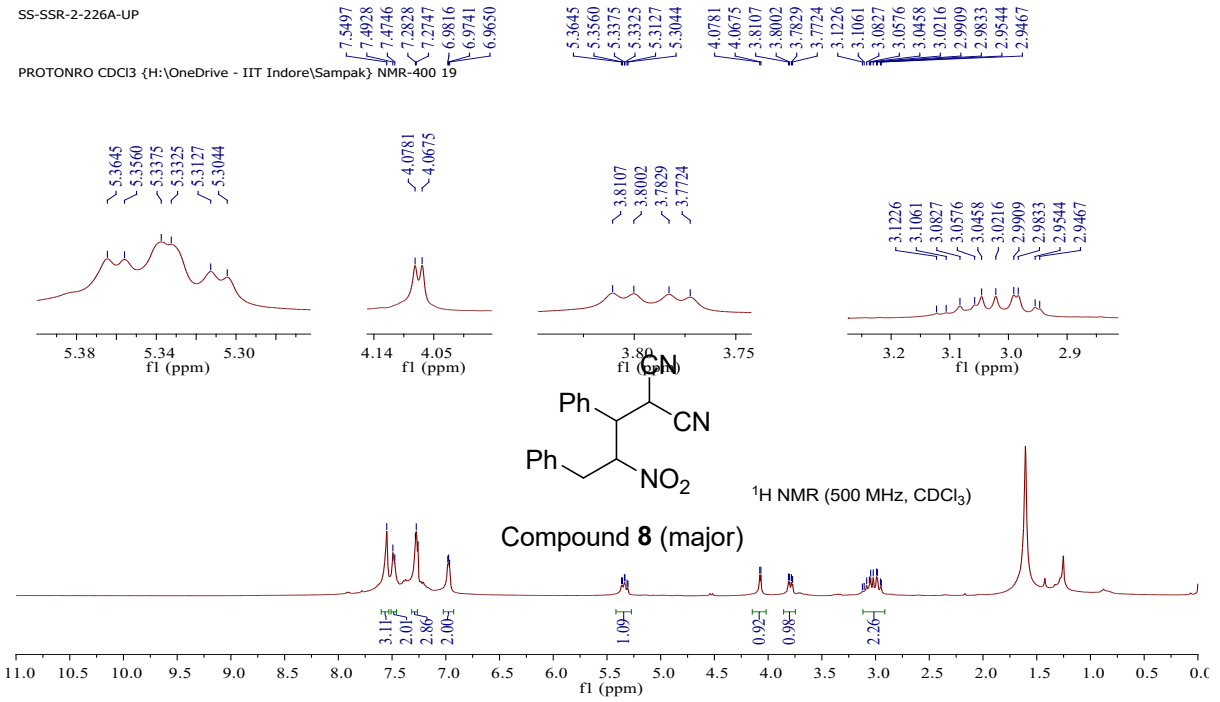

SS-SSR-II-226A-UP

SS-SSR-II-226A-UP

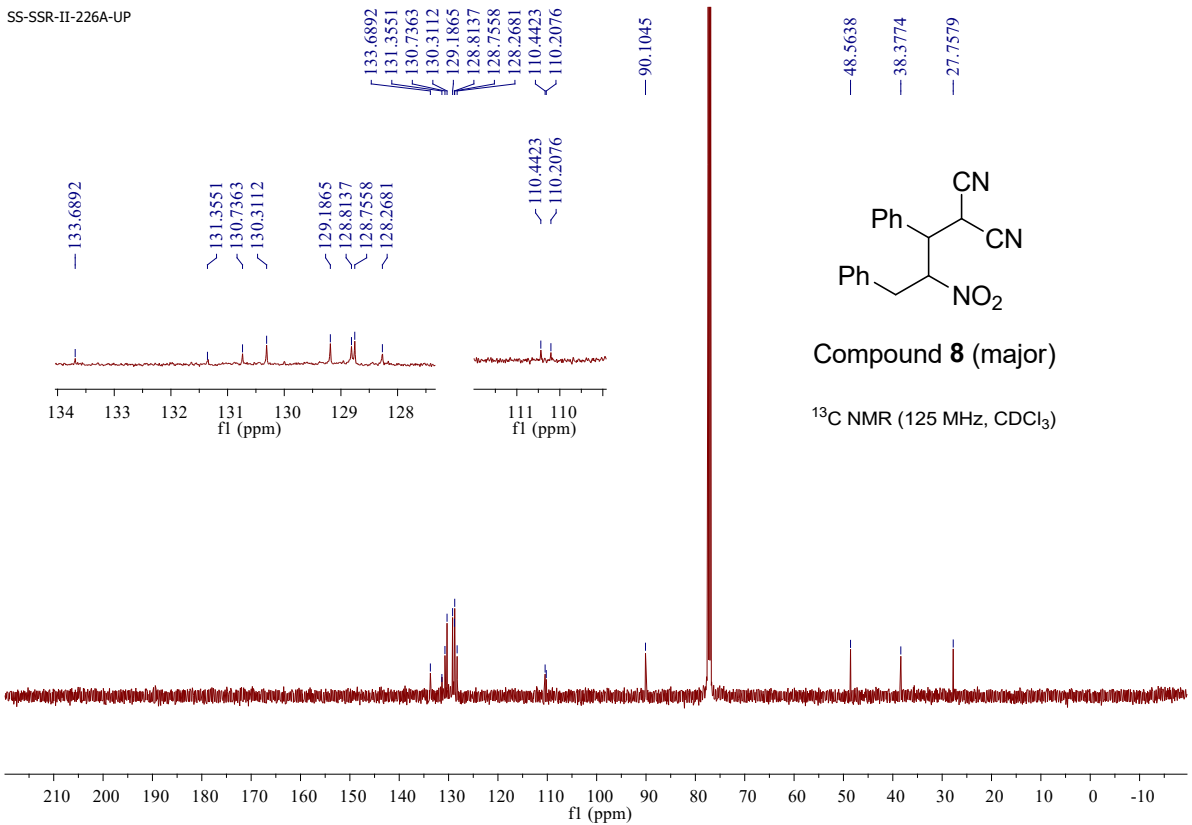

SS-SSR-II-228UP

PROTONRO CDCI3 {H:\OneDrive - IIT Indore\Sampak} NMR-400 42

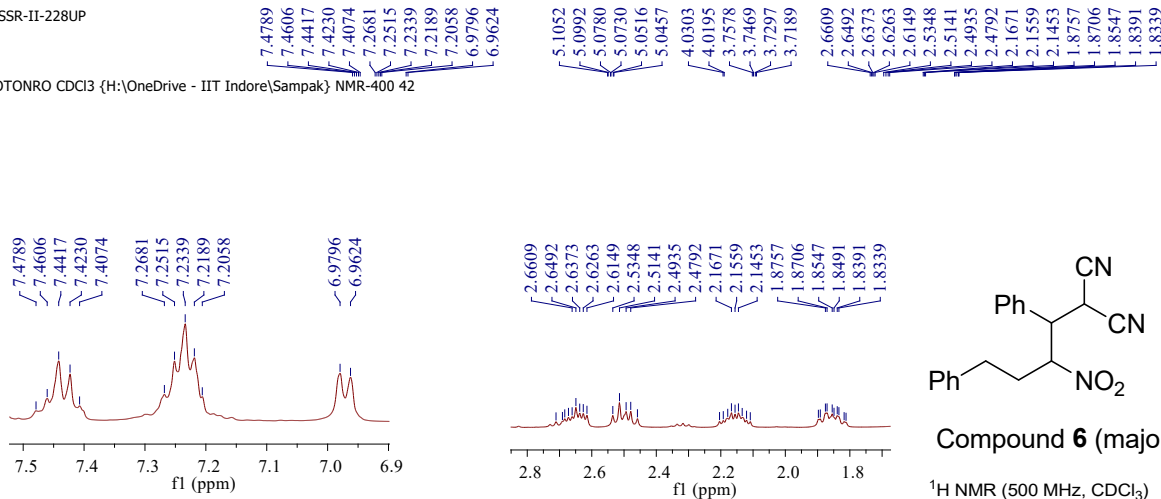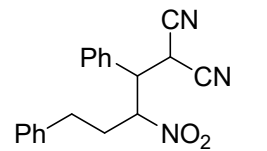

Compound 6 (major)

<sup>1</sup>H NMR (500 MHz, CDCl<sub>3</sub>)

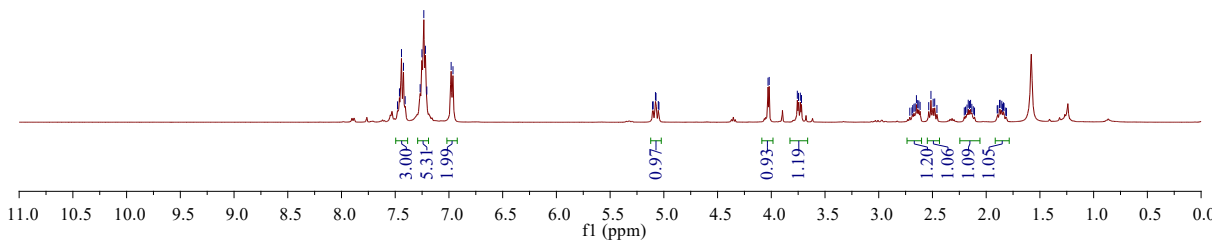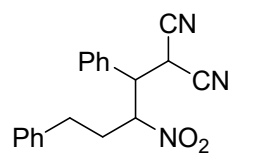

Compound 6 (major)

<sup>13</sup>C NMR (125 MHz, CDCl<sub>3</sub>)

SS-SSR-II-228UP

C13CPD CDCI3 {H:\OneDrive - IIT Indore\Sampak} NMR-400 42

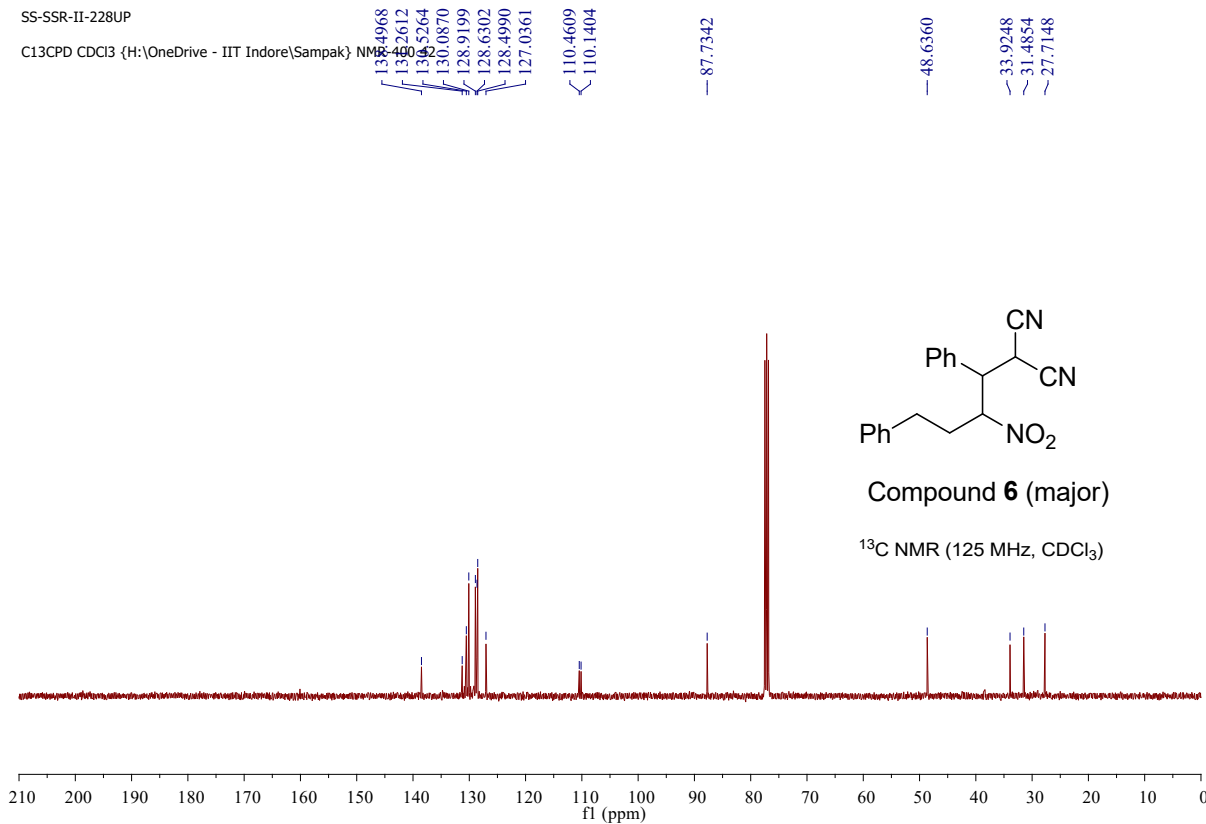



SS-SSR-II-228A-LOW

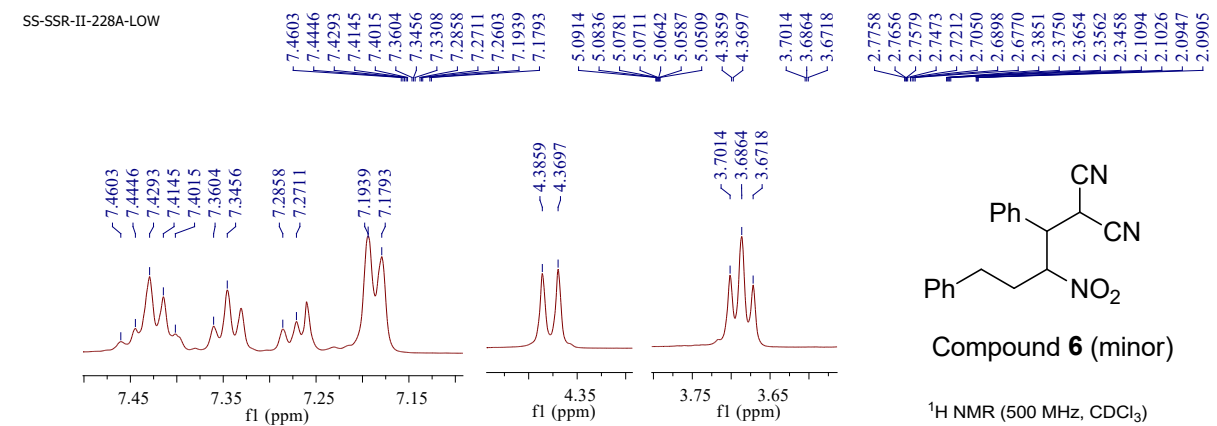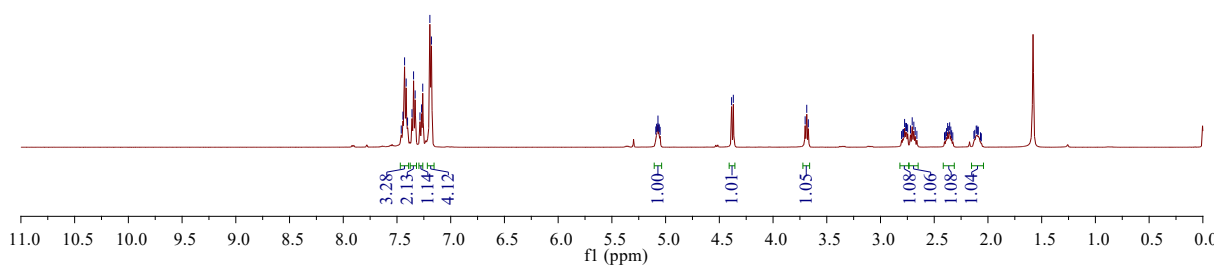

Supplement: d3qo01979a1.pdf [file d3qo01979a1.pdf]
